# Supplementary material for: Early DNA methylation changes in children developing beta cell autoimmunity at a young age
Source: PubMed Central journal article supplement (PMC8960578; doi:10.1007/s00125-022-05657-x), 2022-02-10
Supplement: 125_2022_5657_MOESM1_ESM.pdf [file 125_2022_5657_MOESM1_ESM.pdf]

## **ELECTRONIC SUPPLEMENTARY MATERIAL (ESM)**

### **ESM METHODS**

#### **RRBS data analysis**

First, the sequenced reads (fastq files) were trimmed using TrimGalore ([https://www.bioinformatics.babraham.ac.uk/projects/trim\\_galore/](https://www.bioinformatics.babraham.ac.uk/projects/trim_galore/)) version 0.4.1 in paired end RRBS mode. Quality control was done by examining the fastQC version 0.11.4. Reads were aligned using Genome Reference Consortium Human Build 37 (GRCh37/hg19) (and the lambda phage genome simultaneously with Bowtie2 within Bismark version 0.21.0 [1] with Bismark's default parameters in paired end mode. End repair biases were trimmed at the methylation extraction call step. The detailed methodologies of methylation call extraction, conversion efficiency calculation, removal of M-biases, SNP removal, and other steps were as described [2]. To remove most PCR duplication biases, extremely high coverages (>99th percentile) were replaced by NA. Then, pairs of technical replicates were merged by summing their methylated and total numbers of reads. Further, a minimum coverage 10 was required in at least two matching time points in at least five (out of seven) case-control pairs. The coverage filtering was carried out separately for CD4<sup>+</sup>, CD8<sup>+</sup> T cells, and CD4<sup>-</sup> CD8<sup>-</sup> cell fractions. The numbers of CpG sites in the filtered matrices were 1.95, 2.46, and 1.79 million in the CD4<sup>+</sup>, CD8<sup>+</sup> T cells, and CD4<sup>-</sup>CD8<sup>-</sup> cell fractions, respectively. For principal component analysis, missing values at each CpG site were imputed by the median over samples with non-missing values. This was done separately for the CD4<sup>+</sup>, CD8<sup>+</sup> T cells, and CD4<sup>-</sup>CD8<sup>-</sup> cell fractions. Principal component (PC) analysis was performed as described earlier [2], and PC1 and PC2 were included in the differential methylation analysis to account for technical variation in the data. The detection of differentially methylated CpG sites (DMCs) was performed using a readily implemented generalized linear mixed effects model PQLseq [3] version 1.1. within R version 3.6.1 [4]. Class (case/control), age, principal components 1 and 2 and the pair of individuals were included as fixed effect covariates, and each individual was modeled as a random effect. The pairs of individuals had been matched according to sex, age, and place of birth and allocated to the same library preparation batches and sequencing lanes. In CD8<sup>+</sup> T cells and CD4<sup>-</sup>CD8<sup>-</sup> cell fractions, most samples from each pair of individuals were in the same batch and set of lanes, whereas in CD4<sup>+</sup> T

cell data the different time points were mostly on different lanes. However, each pair of samples (such as the 3-month sample of case 1 and 3-month sample of control 1) was always in the same batch and set of lanes. Therefore, the sample pair was included as a covariate for CD4<sup>+</sup> T cell data, instead of age and pair of individuals. The modeling of CD4<sup>+</sup> T cell data was performed in a fully paired way. That is, at each CpG site both samples within a sample pair were excluded (and the sample pair removed from the design matrix) if coverage was 0 in one of them. The penalized quasi likelihood optimization procedure of PQLseq converged for 71.2% and 69.8% of CpG sites in CD8<sup>+</sup> T cell and CD4<sup>-</sup>CD8<sup>-</sup> cell fraction data, respectively, when full data was used, and 44.1% and 50.3% when only pre-seroconversion samples were used. In CD4<sup>+</sup> T cell data the corresponding numbers were 15.7% and 20.5%, owing to the much larger number of binary covariates (sample pairs instead of pairs of individuals). The CpG sites for which the model did not converge were excluded from further analysis. The Wald test  $p$  values computed within PQLseq were false discovery rate (FDR) corrected [5] and CpG sites with FDR < 0.1 and absolute coverage-corrected mean methylation difference > 0.1 were considered as DMCs. Coverage-corrected mean methylation difference is calculated as  $\text{sum}(\text{number of methylated reads in cases}) / \text{sum}(\text{number of total reads in cases}) - \text{sum}(\text{number of methylated reads in controls}) / \text{sum}(\text{number of total reads in controls})$ . To detect differentially methylated regions (DMR), we utilized the adjust-function implemented in package RADMeth [6] within Methpipe version 3.4.3. on the uncorrected Wald test  $p$  values after sorting the CpG sites by chromosome and location. This function uses a weighted Z-test to combine spatially correlated  $p$  values and then performs a Benjamini-Hochberg correction. These spatially adjusted FDR-corrected  $p$  values were not used to determine the significance but only as one criterion to detect CpG sites that belong to the same DMR around a DMC. A DMR was defined as a genomic region of maximum length 2 kb, including two or more CpG sites, at least one of which had to be a DMC (FDR < 0.1 before any spatial adjustment), with spatially adjusted FDR-corrected  $P$  value < 0.05 and absolute coverage-corrected mean methylation difference > 0.1, at least 90% of which had to have the same direction of methylation difference.

## References

1. Krueger F, Andrews SR (2011) Bismark: a flexible aligner and methylation caller for Bisulfite-Seq applications. *Bioinformatics* 27(11):1571–1572. <https://doi.org/10.1093/bioinformatics/btr167>
2. Laajala E, Halla-aho V, Grönroos T, et al (2021) Permutation-based significance analysis reduces the type 1 error rate in bisulfite sequencing data analysis of human umbilical cord blood samples. *bioRxiv* 2021.05.18.444359. (Preprint). 3 July 2021. Available from: <https://doi.org/10.1101/2021.05.18.444359> (accessed 9 Dec 2021)
3. Sun S, Zhu J, Mozaffari S, Ober C, Chen M, Zhou X (2019) Heritability estimation and differential analysis of count data with generalized linear mixed models in genomic sequencing studies. *Bioinformatics* 35(3):487–496. <https://doi.org/10.1093/bioinformatics/bty644>
4. R Core Team (2020) R: A language and environment for statistical computing. R Foundation for Statistical Computing, Vienna, Austria.
5. Benjamini Y, Hochberg Y (1995) Controlling the False Discovery Rate: A Practical and Powerful Approach to Multiple Testing. *Journal of the Royal Statistical Society Series B (Methodological)* 57(1):289–300
6. Dolzhenko E, Smith AD (2014) Using beta-binomial regression for high-precision differential methylation analysis in multifactor whole-genome bisulfite sequencing experiments. *BMC Bioinformatics* 15(1):215. <https://doi.org/10.1186/1471-2105-15-215>

**ESM Table 1. The information on the available samples for each participant, cell fraction and timepoint**

| Fraction     | CD4+ | CD8+ | CD4-CD8- | CD4+ | CD8+ | CD4-CD8- | CD4+ | CD8+ | CD4-CD8- | CD4+ | CD8+ | CD4-CD8- | CD4+ | CD8+ | CD4-CD8- | CD4+ | CD8+ | CD4-CD8- |
|--------------|------|------|----------|------|------|----------|------|------|----------|------|------|----------|------|------|----------|------|------|----------|
| Timepoint    | 3    | 3    | 3        | 6    | 6    | 6        | 12   | 12   | 12       | 18   | 18   | 18       | 24   | 24   | 24       | 36   | 36   | 36       |
| Case 1       |      |      |          |      |      |          |      |      |          |      |      |          |      |      |          |      |      |          |
| Case 2       |      |      |          |      |      |          |      |      |          | X    |      |          |      |      |          |      |      |          |
| Case 3       |      |      |          |      |      |          | X    |      |          | X    |      | X        | X    | X    | X        |      |      |          |
| Case 5       |      |      |          |      |      |          |      |      |          |      |      | X        |      |      |          |      |      |          |
| Case 9       |      |      |          |      |      |          |      |      |          |      |      |          |      |      |          |      |      |          |
| Case 10      | X    | X    | X        |      |      |          |      |      |          |      |      |          | X    | X    | X        |      |      |          |
| Case 11      |      |      |          | X    | X    | X        |      |      |          |      |      |          |      |      |          |      |      |          |
| Control 1-1  |      |      |          |      |      |          |      |      |          |      |      |          |      |      |          |      |      |          |
| Control 2-1  |      |      |          |      |      |          |      |      |          | X    |      |          |      |      |          |      |      |          |
| Control 3-2  |      |      |          |      |      |          | X    |      |          | X    |      | X        | X    | X    | X        |      |      |          |
| Control 5-2  |      |      |          |      |      |          |      |      |          |      |      |          |      |      |          |      |      |          |
| Control 9-2  |      |      |          |      |      |          |      |      |          |      |      |          |      |      |          |      |      |          |
| Control 10-1 | X    | X    | X        |      |      |          | X    | X    | X        |      |      |          | X    | X    | X        |      |      |          |
| Control 10-2 | X    | X    | X        |      |      |          |      |      |          |      | X    |          | X    | X    | X        |      | X    |          |
| Control 11-2 |      |      |          | X    | X    | X        |      |      |          |      |      |          |      |      |          |      |      |          |

Gray color indicates samples which were analysed. X indicates missing samples.

ESM Table 2. Description of the study participants.

| Case/Control | Study site  | Sex           | T1D Diagnosis     | Diagnosis age | HLA risk category    | Family T1D diagnosis history | Sampling month | IAA (> 2.80 RU) | GADA (> 5.36 RU) | IA-2A (> 0.77 RU) | ZnT8A (> 0.61 RU) | ICA (> 2.5 JDFU) |
|--------------|-------------|---------------|-------------------|---------------|----------------------|------------------------------|----------------|-----------------|------------------|-------------------|-------------------|------------------|
| Case 1       | FINLAND     | Female        | Yes               | 3,2           | Moderately increased | Father age 9                 | 0              | 0,32            | 0,18             | 0,06              | 0,07              | 3                |
|              |             |               |                   |               |                      |                              | 3              | 0,01            | 0                | 0,08              | 0,06              | 0                |
|              |             |               |                   |               |                      |                              | 6              | 0,45            | 0                | 0,16              | 0,08              | 0                |
|              |             |               |                   |               |                      |                              | 12             | <b>14,08</b>    | <b>21,75</b>     | 0,08              | 0,3               | 0                |
|              |             |               |                   |               |                      |                              | 18             | <b>53,07</b>    | <b>1933,3</b>    | <b>88,23</b>      | <b>6,37</b>       | 374              |
|              |             |               |                   |               |                      |                              | 24             | <b>14,44</b>    | <b>305,98</b>    | <b>510,62</b>     | <b>12,89</b>      | 747              |
| 36           | 2,3         | <b>119,94</b> | <b>678,3</b>      | <b>22,46</b>  | 512                  |                              |                |                 |                  |                   |                   |                  |
| Case 2       | FINLAND     | Male          | No                |               | Moderately increased | Father age 27                | 0              | 0               | 0                | 0,13              | 0,05              | 0                |
|              |             |               |                   |               |                      |                              | 3              | 0               | 0                | 0,14              | 0,06              | 0                |
|              |             |               |                   |               |                      |                              | 6              | 0               | 0                | 0,15              | 0,06              | 0                |
|              |             |               |                   |               |                      |                              | 12             | <b>13,46</b>    | 0                | 0,15              | 0,02              | 0                |
|              |             |               |                   |               |                      |                              | 18             | <b>12,75</b>    | 3,46             | 0,07              | 0,1               | 6                |
|              |             |               |                   |               |                      |                              | 24             | <b>7,28</b>     | <b>22,16</b>     | 0,11              | 0,15              | 0                |
| 36           | <b>5,96</b> | <b>173,27</b> | 0,15              | <b>7,53</b>   | 512                  |                              |                |                 |                  |                   |                   |                  |
| Case 3       | FINLAND     | Male          | Yes               | 3,67          | Moderately increased | Maternal uncle age 12        | 0              | 0               | 0                | 0,07              | 0,12              | 0                |
|              |             |               |                   |               |                      |                              | 3              | 0               | 0                | 0,09              | 0,04              | 0                |
|              |             |               |                   |               |                      |                              | 6              | 0,42            | 0                | 0,08              | 0,03              | 0                |
|              |             |               |                   |               |                      |                              | 12             | 0,7             | 0,07             | 0,1               | 0,05              | 0                |
|              |             |               |                   |               |                      |                              | 18             | <b>8,93</b>     | 0,71             | 0,08              | 0,14              | 6                |
|              |             |               |                   |               |                      |                              | 24             | <b>30,08</b>    | <b>195,49</b>    | <b>1013,95</b>    | <b>13,67</b>      | 1024             |
| 36           | <b>11,9</b> | <b>64,38</b>  | <b>894,54</b>     | <b>36,06</b>  | 2048                 |                              |                |                 |                  |                   |                   |                  |
| Case 5       | FINLAND     | Female        | Yes               | 2,63          | High                 | Maternal grandmother age 15  | 0              | 0,06            | 0                | 0,04              | 0,05              | 0                |
|              |             |               |                   |               |                      |                              | 3              | 0               | 0                | 0,05              | 0,06              | 0                |
|              |             |               |                   |               |                      |                              | 6              | 0,22            | 0                | 0,07              | 0,06              | 0                |
|              |             |               |                   |               |                      |                              | 12             | 0,09            | 1,1              | 0,1               | 0,03              | 0                |
|              |             |               |                   |               |                      |                              | 18             | 2,42            | 0                | 0,17              | 0,07              | 0                |
|              |             |               |                   |               |                      |                              | 24             | <b>6,49</b>     | 2,64             | <b>19,82</b>      | <b>3,58</b>       | 47               |
| 36           | <b>3,97</b> | <b>0,32</b>   | <b>74,61</b>      | 0,5           | 256                  |                              |                |                 |                  |                   |                   |                  |
| Case 9       | FINLAND     | Male          | No, transient abs |               | Moderately increased |                              | 0              | 0               | 0                | 0,14              | 0,06              | 0                |
|              |             |               |                   |               |                      |                              | 3              | 0               | 0                | 0,08              | 0,13              | 0                |
|              |             |               |                   |               |                      |                              | 6              | 1,36            | 0                | 0,07              | 0,07              | 0                |
|              |             |               |                   |               |                      |                              | 12             | 0,39            | 1,43             | 0,08              | 0,06              | 0                |
|              |             |               |                   |               |                      |                              | 18             | <b>12,28</b>    | <b>11,57</b>     | 0,11              | 0,1               | 4                |
|              |             |               |                   |               |                      |                              | 24             | 1,55            | 0,99             | 0,16              | 0,1               | 0                |
| 36           | <b>4,7</b>  | 0             | <b>0,09</b>       | <b>0,13</b>   | 0                    |                              |                |                 |                  |                   |                   |                  |
| Case 10      | ESTONIA     | Female        | No, transient abs |               | Slightly increased   |                              | 0              | 0               | 0                | 0,13              | 0,15              | 0                |
|              |             |               |                   |               |                      |                              | 6              | 0,04            | 0                | 0,05              | 0,05              | 0                |
|              |             |               |                   |               |                      |                              | 12             | <b>21,78</b>    | <b>18,46</b>     | 0,07              | 0,09              | 0                |
|              |             |               |                   |               |                      |                              | 18             | <b>34,01</b>    | 1,94             | 0,08              | 0,12              | 0                |
|              |             |               |                   |               |                      |                              | 36             | <b>8,09</b>     | 0                | 0,14              | 0,1               | 0                |
| Case 11      | ESTONIA     | Female        | Yes               | 2,41          | Moderately increased | Father age 5                 | 0              | 0,53            | 0                | 0,09              | 0,04              | 0                |
|              |             |               |                   |               |                      |                              | 3              | 0,05            | 0                | 0,08              | 0,03              | 0                |
|              |             |               |                   |               |                      |                              | 12             | 0,98            | 3,95             | 0,09              | 0,11              | 0                |
|              |             |               |                   |               |                      |                              | 18             | 0,54            | <b>131,68</b>    | 0,19              | 0,17              | 0                |
|              |             |               |                   |               |                      |                              | 24             | <b>8,59</b>     | <b>189,7</b>     | 0,39              | 0,13              | 512              |
|              |             |               |                   |               |                      |                              | 36             | <b>32,98</b>    | <b>26,36</b>     | <b>3,48</b>       | 0,15              | 16               |
| Control 1    | FINLAND     | Female        | No                |               | Moderately increased |                              | 0              | 0,19            | 0,26             | 0,08              | 0,06              | -                |
|              |             |               |                   |               |                      |                              | 3              | 0               | 0                | 0,06              | 0,04              | -                |
|              |             |               |                   |               |                      |                              | 6              | 0               | 0                | 0,08              | 0,06              | -                |
|              |             |               |                   |               |                      |                              | 12             | 0,28            | 0,07             | 0,09              | 0,07              | -                |

|              |         |        |    |                      |              |    |      |      |      |      |   |
|--------------|---------|--------|----|----------------------|--------------|----|------|------|------|------|---|
|              |         |        |    |                      |              | 18 | 0    | 0    | 0,07 | 0,07 | - |
|              |         |        |    |                      |              | 24 | 0,28 | 1,56 | 0,09 | 0,13 | - |
|              |         |        |    |                      |              | 36 | 0,92 | 0,71 | 0,11 | 0,09 | - |
| Control 2    | FINLAND | Male   | No | Moderately increased |              | 0  | 0,31 | 0    | 0,02 | 0,18 | - |
|              |         |        |    |                      |              | 3  | 0,14 | 0    | 0,02 | 0,1  | - |
|              |         |        |    |                      |              | 6  | 0,63 | 0    | 0    | 0,07 | - |
|              |         |        |    |                      |              | 12 | 0,2  | 0    | 0,06 | 0,06 | - |
|              |         |        |    |                      |              | 18 | 0    | 0    | 0,16 | 0,1  | - |
|              |         |        |    |                      |              | 24 | 0    | 0,93 | 0,1  | 0,05 | - |
|              |         |        |    |                      |              | 36 | 0,14 | 0    | 0,1  | 0,09 | - |
| Control 3    | FINLAND | Male   | No | Moderately increased |              | 0  | 0,62 | 0    | 0,09 | 0,02 | - |
|              |         |        |    |                      |              | 3  | 0    | 0    | 0,13 | 0,03 | - |
|              |         |        |    |                      |              | 6  | 0,53 | 0    | 0,11 | 0,03 | - |
|              |         |        |    |                      |              | 12 | 0    | 0    | 0,12 | 0,05 | - |
|              |         |        |    |                      |              | 18 | 0    | 0    | 0,09 | 0,07 | - |
|              |         |        |    |                      |              | 36 | 0,23 | 0    | 0,14 | 0,11 | - |
| Control 5    | FINLAND | Female | No | High                 | Father age 6 | 3  | 0,36 | 0    | 0,1  | 0,09 | - |
|              |         |        |    |                      |              | 6  | 0,34 | 0    | 0,07 | 0,07 | - |
|              |         |        |    |                      |              | 12 | 0,02 | 1,62 | 0,08 | 0,07 | - |
|              |         |        |    |                      |              | 18 | 0,46 | 1,57 | 0,07 | 0,15 | - |
|              |         |        |    |                      |              | 24 | 0,86 | 0,39 | 0,07 | 0,11 | - |
|              |         |        |    |                      |              | 36 | 0    | 0    | 0,07 | 0,07 | - |
| Control 9    | FINLAND | Male   | No | Moderately increased |              | 0  | 0    | 0    | 0,12 | 0,07 | - |
|              |         |        |    |                      |              | 3  | 0,77 | 0    | 0,32 | 0,1  | - |
|              |         |        |    |                      |              | 6  | 1,03 | 0    | 0,09 | 0,08 | - |
|              |         |        |    |                      |              | 12 | 1,41 | 0,21 | 0,06 | 0,1  | - |
|              |         |        |    |                      |              | 18 | 0,28 | 0,72 | 0,11 | 0,09 | - |
|              |         |        |    |                      |              | 24 | 0,38 | 0    | 0,11 | 0,09 | - |
|              |         |        |    |                      |              | 36 | 0    | 0    | 0,07 | 0,1  | - |
| Control 10.1 | ESTONIA | Female | No | Slightly increased   |              | 0  | 0    | 0,24 | 0,08 | 0,05 | - |
|              |         |        |    |                      |              | 18 | 0,49 | 1,14 | 0,1  | 0,14 | - |
|              |         |        |    |                      |              | 36 | 0,68 | 0    | 0,12 | 0,1  | - |
| Control 10.2 | ESTONIA | Female | No | Slightly increased   |              | 0  | 0    | 0    | 0,15 | 0,08 | - |
|              |         |        |    |                      |              | 6  | 0,17 | 0,09 | 0,08 | 0,09 | - |
|              |         |        |    |                      |              | 12 | 0,56 | 0,21 | 0,13 | 0,07 | - |
|              |         |        |    |                      |              | 18 | 0,39 | 0    | 0,08 | 0,12 | - |
|              |         |        |    |                      |              | 36 | 0,62 | 0    | 0,09 | 0,09 | - |
| Control 11   | ESTONIA | Female | No | Moderately increased |              | 0  | 0,7  | 0    | 0,12 | 0,03 | - |
|              |         |        |    |                      |              | 3  | 0,35 | 0    | 0,06 | 0,05 | - |
|              |         |        |    |                      |              | 12 | 0,95 | 0,05 | 0,11 | 0,1  | - |
|              |         |        |    |                      |              | 18 | 0,12 | 0    | 0,13 | 0,08 | - |
|              |         |        |    |                      |              | 24 | 0,75 | 0    | 0,12 | 0,1  | - |
|              |         |        |    |                      |              | 36 | 0,53 | 0    | 0,13 | 0,11 | - |

The columns 9-12 contain information about autoantibodies values against insulin (IAA), glutamic acid decarboxylase (GADA), islet antigen-2 (IA-2A), zinc transporter 8 (ZnT8). A sample was considered seropositive (in bold) when any of the autoantibodies exceeded the thresholds (indicated in the column header). The column 13 contains information about islet cell antibodies measured in autoantibody-positive subjects. The detection limit in the assay was 2.5 JDFU. T1D, type 1 diabetes; RU, relative units; ICA, islet cell antibodies; JDFU, juvenile diabetes foundation unit.

**ESM Table 3. Differentially methylated CpGs identified in the CD4<sup>+</sup> T cell fraction between cases and controls in all longitudinal samples**

| Methylation difference |          |          |                        | Nearest gene        |                          |              | Methylation-expression correlation analysis |                                                |                     | eQTM analysis |           |                 |                   | GeneHancer database |                                             |
|------------------------|----------|----------|------------------------|---------------------|--------------------------|--------------|---------------------------------------------|------------------------------------------------|---------------------|---------------|-----------|-----------------|-------------------|---------------------|---------------------------------------------|
| CpG site               | P value  | FDR      | Methylation difference | Nearest gene        | Distance to nearest gene | Genomic part | Nearest gene correlation, Spearman rho      | The highest observed correlation, Spearman rho | Correlating gene    | CpG name      | eQTM, FDR | Overall Z Score | CpG found on 450K | GeneHancer          | Genes possibly regulated by standalone DMCs |
| chr2:113192477         | 8,45E-13 | 1,25E-07 | 0.13                   | <i>RGPD8</i>        | -416                     | promoter     | -0.293                                      | -0.293                                         | <i>RGPD8</i>        | NA            | NA        | NA              | FALSE             |                     |                                             |
| <b>chr11:42897003</b>  | 1,42E-12 | 1,40E-07 | 0.456                  | <i>HNRNPKP3</i>     | 393917                   | intergenic   | NA                                          | NA                                             | NA                  | NA            | NA        | NA              | FALSE             |                     |                                             |
| chr7:22861070          | 2,61E-12 | 1,93E-07 | -0.16                  | <i>TOMM7</i>        | 1402                     | intron       | 0.183                                       | -0.28                                          | <i>FAM126A</i>      | NA            | NA        | NA              | FALSE             |                     |                                             |
| <b>chr1:44878291</b>   | 4,46E-12 | 2,64E-07 | -0.104                 | <i>RNF220</i>       | 7243                     | exon         | -0.061                                      | -0.277                                         | <i>DMAP1</i>        | NA            | NA        | NA              | FALSE             |                     |                                             |
| chr11:118842572        | 1,25E-10 | 3,71E-06 | 0.101                  | <i>FOXR1</i>        | 157                      | promoter     | NA                                          | 0.291                                          | <i>RPS25</i>        | NA            | NA        | NA              | FALSE             |                     |                                             |
| chr14:103227394        | 5,86E-10 | 1,24E-05 | -0.15                  | <i>TRAF3</i>        | -16422                   | intergenic   | 0.307                                       | 0.307                                          | <i>TRAF3</i>        | NA            | NA        | NA              | FALSE             |                     |                                             |
| chr6:121069653         | 6,88E-10 | 1,34E-05 | -0.124                 | <i>C6orf170</i>     | 488556                   | intergenic   | NA                                          | NA                                             | NA                  | NA            | NA        | NA              | FALSE             |                     |                                             |
| chr9:137674085         | 7,25E-10 | 1,34E-05 | -0.113                 | <i>MIR3689C</i>     | 67131                    | intron       | NA                                          | 0.221                                          | <i>FCN1</i>         | NA            | NA        | NA              | FALSE             |                     |                                             |
| chr19:18118304         | 1,11E-09 | 1,94E-05 | -0.174                 | <i>ARRDC2</i>       | -673                     | promoter     | -0.087                                      | 0.297                                          | <i>JAK3</i>         | NA            | NA        | NA              | FALSE             |                     |                                             |
| chr22:39633525         | 1,77E-09 | 2,61E-05 | 0.189                  | <i>PDGFB</i>        | 3390                     | intron       | NA                                          | -0.167                                         | <i>APOBEC3D</i>     | NA            | NA        | NA              | FALSE             |                     |                                             |
| <b>chr7:157225446</b>  | 3,31E-09 | 4,08E-05 | -0.11                  | <i>DNAB6</i>        | 21533                    | intergenic   | 0.122                                       | 0.18                                           | <i>RP4-814D15.1</i> | NA            | NA        | NA              | FALSE             |                     |                                             |
| <b>chr20:25847039</b>  | 6,97E-09 | 7,11E-05 | 0.122                  | <i>FAM182B</i>      | 1748                     | intron       | NA                                          | 0.007                                          | <i>ZNF337</i>       | NA            | NA        | NA              | FALSE             |                     |                                             |
| chr9:137673996         | 7,32E-09 | 7,22E-05 | -0.173                 | <i>MIR3689C</i>     | 67220                    | intron       | NA                                          | 0.276                                          | <i>FCN1</i>         | NA            | NA        | NA              | FALSE             |                     |                                             |
| chr20:47013333         | 8,16E-09 | 7,79E-05 | -0.181                 | <i>LINC00494</i>    | 18945                    | intergenic   | NA                                          | NA                                             | NA                  | NA            | NA        | NA              | FALSE             |                     |                                             |
| <b>chr11:42894941</b>  | 1,46E-08 | 1,23E-04 | 0.426                  | <i>HNRNPKP3</i>     | 395979                   | intergenic   | NA                                          | NA                                             | NA                  | NA            | NA        | NA              | FALSE             |                     |                                             |
| chr19:1336301          | 1,94E-08 | 1,59E-04 | 0.143                  | <i>MUM1</i>         | -18675                   | intergenic   | -0.016                                      | 0.301                                          | <i>REEP6</i>        | NA            | NA        | NA              | FALSE             |                     |                                             |
| chr17:72916077         | 3,45E-08 | 2,55E-04 | 0.23                   | <i>USH1G</i>        | 3275                     | exon         | NA                                          | 0.414                                          | <i>KCTD2</i>        | NA            | NA        | NA              | FALSE             |                     |                                             |
| chr6:142623625         | 6,26E-08 | 4,52E-04 | -0.125                 | <i>GPR126</i>       | 571                      | promoter     | NA                                          | -0.024                                         | <i>VTA1</i>         | NA            | NA        | NA              | FALSE             |                     |                                             |
| <b>chr19:46909138</b>  | 7,53E-08 | 5,18E-04 | 0.121                  | <i>CCDC8</i>        | 7782                     | intergenic   | NA                                          | 0.236                                          | <i>CALM3</i>        | NA            | NA        | NA              | FALSE             |                     |                                             |
| <b>chr7:48686394</b>   | 1,02E-07 | 6,57E-04 | 0.129                  | <i>ABCA13</i>       | 191762                   | exon         | NA                                          | NA                                             | NA                  | NA            | NA        | NA              | FALSE             |                     |                                             |
| chr18:77398359         | 2,46E-07 | 1,26E-03 | 0.144                  | <i>CTDP1</i>        | -41442                   | intergenic   | -0.036                                      | -0.084                                         | <i>NFATC1</i>       | NA            | NA        | NA              | FALSE             |                     |                                             |
| chr2:27038408          | 2,75E-07 | 1,34E-03 | -0.157                 | <i>CENPA</i>        | 29528                    | intergenic   | NA                                          | -0.248                                         | <i>TMEM214</i>      | NA            | NA        | NA              | FALSE             |                     |                                             |
| chr9:46355235          | 2,74E-07 | 1,34E-03 | -0.148                 | <i>Y_RNA</i>        | -7370                    | intergenic   | NA                                          | NA                                             | NA                  | NA            | NA        | NA              | FALSE             |                     |                                             |
| chr20:47013383         | 4,17E-07 | 1,89E-03 | -0.166                 | <i>LINC00494</i>    | 18995                    | intergenic   | NA                                          | NA                                             | NA                  | NA            | NA        | NA              | FALSE             |                     |                                             |
| chr21:45565981         | 5,53E-07 | 2,34E-03 | 0.134                  | <i>C21orf33</i>     | 12489                    | intergenic   | -0.185                                      | -0.44                                          | <i>PFKL</i>         | NA            | NA        | NA              | FALSE             |                     |                                             |
| <b>chr7:75280121</b>   | 5,79E-07 | 2,38E-03 | -0.131                 | <i>HIP1</i>         | 88163                    | intron       | NA                                          | 0.255                                          | <i>RHBDD2</i>       | NA            | NA        | NA              | FALSE             | enhancer            | <i>HIP1</i>                                 |
| chr7:154585741         | 7,44E-07 | 2,82E-03 | -0.187                 | <i>LOC100132707</i> | -134486                  | intron       | NA                                          | -0.198                                         | <i>RP11-5C23.1</i>  | NA            | NA        | NA              | FALSE             |                     |                                             |
| chr1:43814484          | 7,64E-07 | 2,86E-03 | -0.132                 | <i>CDC20</i>        | -10142                   | intron       | NA                                          | 0.274                                          | <i>MED8</i>         | NA            | NA        | NA              | FALSE             |                     |                                             |
| chr16:88453881         | 7,87E-07 | 2,91E-03 | 0.144                  | <i>ZNF469</i>       | -39998                   | intergenic   | NA                                          | -0.175                                         | <i>ZC3H18</i>       | NA            | NA        | NA              | FALSE             |                     |                                             |
| chr19:18118337         | 1,09E-06 | 3,77E-03 | -0.124                 | <i>ARRDC2</i>       | -640                     | promoter     | -0.074                                      | -0.283                                         | <i>IFI30</i>        | NA            | NA        | NA              | FALSE             |                     |                                             |
| <b>chr3:71804881</b>   | 1,06E-06 | 3,77E-03 | 0.112                  | <i>EIF4E3</i>       | -958                     | promoter     | 0.129                                       | 0.129                                          | <i>EIF4E3</i>       | NA            | NA        | NA              | FALSE             |                     |                                             |
| chr6:163570410         | 1,15E-06 | 3,87E-03 | -0.16                  | <i>AK296276</i>     | 42431                    | intron       | NA                                          | NA                                             | NA                  | NA            | NA        | NA              | FALSE             |                     |                                             |
| chr7:155832938         | 1,18E-06 | 3,92E-03 | -0.112                 | <i>Mir_598</i>      | -106265                  | intergenic   | NA                                          | NA                                             | NA                  | NA            | NA        | NA              | TRUE              |                     |                                             |
| chr16:2848681          | 1,25E-06 | 4,07E-03 | 0.102                  | <i>PRSS41</i>       | 197                      | promoter     | NA                                          | 0.431                                          | <i>PRSS21</i>       | NA            | NA        | NA              | FALSE             |                     |                                             |
| chr21:46714732         | 1,25E-06 | 4,07E-03 | -0.108                 | <i>LOC642852</i>    | 6753                     | exon         | NA                                          | -0.44                                          | <i>POFUT2</i>       | NA            | NA        | NA              | FALSE             |                     |                                             |
| chr7:155832817         | 1,32E-06 | 4,26E-03 | -0.115                 | <i>Mir_598</i>      | -106144                  | intergenic   | NA                                          | NA                                             | NA                  | NA            | NA        | NA              | FALSE             |                     |                                             |
| chr9:137674072         | 1,44E-06 | 4,55E-03 | -0.137                 | <i>MIR3689C</i>     | 67144                    | intron       | NA                                          | 0.183                                          | <i>FCN1</i>         | NA            | NA        | NA              | FALSE             |                     |                                             |
| chr2:27038313          | 1,62E-06 | 4,98E-03 | -0.163                 | <i>CENPA</i>        | 29433                    | intergenic   | NA                                          | -0.212                                         | <i>TMEM214</i>      | NA            | NA        | NA              | TRUE              |                     |                                             |
| chr2:27038339          | 1,98E-06 | 5,73E-03 | -0.177                 | <i>CENPA</i>        | 29459                    | intergenic   | NA                                          | 0.191                                          | <i>AGBL5</i>        | NA            | NA        | NA              | FALSE             |                     |                                             |
| chr8:49309214          | 2,44E-06 | 6,40E-03 | 0.157                  | <i>EFCAB1</i>       | 338657                   | intergenic   | NA                                          | NA                                             | NA                  | NA            | NA        | NA              | FALSE             |                     |                                             |
| <b>chr4:39569133</b>   | 2,50E-06 | 6,47E-03 | -0.434                 | <i>SMIM14</i>       | 16446                    | intron       | NA                                          | -0.238                                         | <i>LIAS</i>         | NA            | NA        | NA              | FALSE             |                     |                                             |
| chr21:46714810         | 2,66E-06 | 6,57E-03 | -0.109                 | <i>LOC642852</i>    | 6831                     | exon         | NA                                          | -0.561                                         | <i>POFUT2</i>       | NA            | NA        | NA              | FALSE             |                     |                                             |
| chr7:22860983          | 2,88E-06 | 6,98E-03 | -0.191                 | <i>TOMM7</i>        | 1489                     | intron       | 0.24                                        | 0.24                                           | <i>TOMM7</i>        | NA            | NA        | NA              | FALSE             |                     |                                             |
| chr7:22860985          | 3,22E-06 | 7,30E-03 | -0.231                 | <i>TOMM7</i>        | 1487                     | intron       | 0.189                                       | -0.24                                          | <i>FAM126A</i>      | NA            | NA        | NA              | FALSE             |                     |                                             |
| <b>chr7:3169658</b>    | 3,13E-06 | 7,30E-03 | 0.296                  | <i>BC038729</i>     | 44630                    | intergenic   | NA                                          | 0.075                                          | <i>CARD11</i>       | NA            | NA        | NA              | FALSE             |                     |                                             |
| chr7:64540960          | 3,23E-06 | 7,30E-03 | -0.147                 | <i>BC044608</i>     | 679                      | promoter     | NA                                          | 0.2                                            | <i>ZNF273</i>       | NA            | NA        | NA              | FALSE             |                     |                                             |

|                 |          |          |        |              |        |            |        |        |               |            |             |          |       |          |                |
|-----------------|----------|----------|--------|--------------|--------|------------|--------|--------|---------------|------------|-------------|----------|-------|----------|----------------|
| chr18:60278521  | 3,46E-06 | 7,58E-03 | 0.105  | DKFZp451A185 | 29485  | intergenic | NA     | 0.295  | ZCCHC2        | NA         | NA          | NA       | FALSE |          |                |
| chr21:47308422  | 3,80E-06 | 7,98E-03 | -0.208 | PCBP3        | -7700  | intron     | -0.517 | -0.517 | PCBP3         | NA         | NA          | NA       | FALSE |          |                |
| chr19:48000364  | 3,89E-06 | 7,99E-03 | -0.109 | NAPA-AS1     | 12827  | intron     | -0.141 | -0.141 | NAPA-AS1      | NA         | NA          | NA       | TRUE  |          |                |
| chr16:88453824  | 4,23E-06 | 8,34E-03 | 0.152  | ZNF469       | -40055 | intergenic | NA     | -0.07  | ZC3H18        | NA         | NA          | NA       | TRUE  |          |                |
| chr2:27038406   | 4,22E-06 | 8,34E-03 | -0.155 | CENPA        | 29526  | intergenic | NA     | -0.229 | TMEM214       | NA         | NA          | NA       | FALSE |          |                |
| chr4:186318341  | 4,31E-06 | 8,41E-03 | -0.168 | ANKRD37      | 503    | promoter   | 0.151  | 0.304  | SNX25         | NA         | NA          | NA       | FALSE |          |                |
| chr2:198768428  | 4,56E-06 | 8,77E-03 | 0.382  | PLCL1        | 99004  | intron     | 0.139  | 0.139  | PLCL1         | NA         | NA          | NA       | FALSE |          |                |
| chr2:27038368   | 4,65E-06 | 8,88E-03 | -0.166 | CENPA        | 29488  | intergenic | NA     | 0.17   | AGBL5         | NA         | NA          | NA       | FALSE |          |                |
| chr4:81128398   | 4,71E-06 | 8,92E-03 | -0.143 | PRDM8        | 9743   | intergenic | 0.101  | 0.101  | PRDM8         | cg05474265 | 0.0471994   | 3.63078  | TRUE  |          |                |
| chr4:186318348  | 5,16E-06 | 9,49E-03 | -0.18  | ANKRD37      | 510    | promoter   | 0.059  | 0.311  | SNX25         | NA         | NA          | NA       | FALSE |          |                |
| chr4:6107710    | 5,62E-06 | 1,00E-02 | -0.14  | JAKMIP1      | 88637  | intron     | NA     | NA     | NA            | NA         | NA          | NA       | FALSE |          |                |
| chr18:77397978  | 6,34E-06 | 1,05E-02 | 0.107  | CTDP1        | -41823 | intergenic | -0.357 | -0.357 | CTDP1         | NA         | NA          | NA       | FALSE |          |                |
| chr1:228659024  | 6,42E-06 | 1,06E-02 | 0.166  | Histone3     | -7134  | intergenic | NA     | 0.269  | RNF187        | NA         | NA          | NA       | FALSE |          |                |
| chr2:129160452  | 6,93E-06 | 1,11E-02 | -0.244 | HS6ST1       | -84282 | intergenic | -0.153 | -0.153 | HS6ST1        | NA         | NA          | NA       | FALSE |          |                |
| chr1:43814660   | 7,37E-06 | 1,13E-02 | -0.18  | CDC20        | -9966  | exon       | NA     | 0.345  | MED8          | NA         | NA          | NA       | FALSE |          |                |
| chr1:54869222   | 7,44E-06 | 1,13E-02 | 0.156  | SSBP3        | 2847   | intron     | 0.121  | 0.154  | SSBP3-AS1     | NA         | NA          | NA       | FALSE | promoter | SSBP3          |
| chr7:98029163   | 7,37E-06 | 1,13E-02 | -0.105 | BAIAP2L1     | 1265   | intron     | NA     | 0.453  | BR13          | NA         | NA          | NA       | FALSE | promoter | BR13, BAIAP2L1 |
| chr9:103238980  | 9,02E-06 | 1,30E-02 | -0.123 | TMEFF1       | 3462   | intron     | NA     | -0.217 | TEX10         | NA         | NA          | NA       | FALSE |          |                |
| chr16:8960728   | 9,71E-06 | 1,36E-02 | -0.109 | CARHSP1      | 558    | promoter   | -0.125 | 0.365  | C16orf72      | NA         | NA          | NA       | FALSE | promoter | PMM2, CARHSP1  |
| chr11:134709660 | 1,02E-05 | 1,40E-02 | 0.166  | AK125040     | 103823 | intergenic | NA     | NA     | NA            | NA         | NA          | NA       | FALSE |          |                |
| chr2:27038448   | 1,05E-05 | 1,42E-02 | -0.102 | CENPA        | 29568  | intergenic | NA     | -0.342 | MAPRE3        | NA         | NA          | NA       | FALSE |          |                |
| chr16:33039660  | 1,13E-05 | 1,47E-02 | -0.135 | IGH          | 19009  | intron     | NA     | NA     | NA            | NA         | NA          | NA       | FALSE |          |                |
| chr19:1336307   | 1,14E-05 | 1,48E-02 | 0.112  | MUM1         | -18669 | intergenic | -0.078 | -0.216 | GPX4          | NA         | NA          | NA       | FALSE |          |                |
| chr11:75993457  | 1,15E-05 | 1,48E-02 | 0.168  | TRNA_Pro     | -46518 | intergenic | NA     | 0.206  | PRKRIR        | NA         | NA          | NA       | FALSE |          |                |
| chr12:9892305   | 1,15E-05 | 1,48E-02 | -0.108 | CLECL1       | -6411  | intergenic | 0.063  | -0.465 | CLEC2D        | NA         | NA          | NA       | FALSE |          |                |
| chr14:65690537  | 1,16E-05 | 1,48E-02 | 0.116  | BX161428     | -1473  | intergenic | NA     | 0.44   | MAX           | NA         | NA          | NA       | FALSE |          |                |
| chr3:193693011  | 1,16E-05 | 1,48E-02 | -0.118 | DPPA2P3      | 19017  | intron     | NA     | 0.168  | HES1          | NA         | NA          | NA       | FALSE |          |                |
| chr2:27038396   | 1,18E-05 | 1,50E-02 | -0.163 | CENPA        | 29516  | intergenic | NA     | 0.205  | AGBL5         | NA         | NA          | NA       | FALSE |          |                |
| chr1:43814666   | 1,20E-05 | 1,51E-02 | -0.175 | CDC20        | -9960  | exon       | NA     | 0.28   | MED8          | NA         | NA          | NA       | FALSE |          |                |
| chr8:144808965  | 1,24E-05 | 1,55E-02 | 0.151  | FAM83H       | 4106   | exon       | NA     | NA     | FAM83H        | cg09380067 | 0.012695273 | 4.020182 | TRUE  |          |                |
| chr5:131607611  | 1,28E-05 | 1,58E-02 | 0.154  | PDLIM4       | 14262  | intron     | NA     | -0.326 | C5orf56       | NA         | NA          | NA       | FALSE |          |                |
| chr7:22861068   | 1,28E-05 | 1,58E-02 | -0.143 | TOMM7        | 1404   | intron     | 0.142  | -0.27  | FAM126A       | NA         | NA          | NA       | FALSE |          |                |
| chr21:47307692  | 1,33E-05 | 1,59E-02 | -0.171 | PCBP3        | -8430  | intron     | -0.591 | -0.591 | PCBP3         | NA         | NA          | NA       | FALSE |          |                |
| chr9:2211535    | 1,33E-05 | 1,59E-02 | -0.564 | SMARCA2      | 51273  | intergenic | 0.001  | 0.206  | RP11-264I13.2 | NA         | NA          | NA       | FALSE |          |                |
| chr19:46915445  | 1,55E-05 | 1,74E-02 | 0.143  | CCDC8        | 1475   | exon       | NA     | -0.253 | GNG8          | NA         | NA          | NA       | FALSE |          |                |
| chr21:46714738  | 1,57E-05 | 1,74E-02 | -0.125 | LOC642852    | 6759   | exon       | NA     | -0.475 | POFUT2        | NA         | NA          | NA       | FALSE |          |                |
| chr19:1336246   | 1,68E-05 | 1,82E-02 | 0.11   | MUM1         | -18730 | intergenic | 0.08   | 0.214  | REEP6         | NA         | NA          | NA       | FALSE |          |                |
| chr10:71801791  | 1,74E-05 | 1,83E-02 | -0.122 | H2AFY2       | -10566 | intergenic | -0.06  | 0.32   | PPA1          | NA         | NA          | NA       | FALSE |          |                |
| chr14:65542789  | 1,76E-05 | 1,83E-02 | -0.488 | LOC100506321 | -13847 | exon       | NA     | 0.315  | RP11-840I19.3 | NA         | NA          | NA       | FALSE |          |                |
| chr19:58571189  | 1,75E-05 | 1,83E-02 | 0.105  | ZNF135       | 584    | promoter   | NA     | 0.334  | ZNF587B       | NA         | NA          | NA       | FALSE |          |                |
| chr2:27038329   | 1,76E-05 | 1,83E-02 | -0.177 | CENPA        | 29449  | intergenic | NA     | -0.189 | MAPRE3        | NA         | NA          | NA       | FALSE |          |                |
| chr20:3218611   | 1,78E-05 | 1,83E-02 | -0.108 | SLC4A11      | 225    | promoter   | NA     | 0.159  | UBOX5         | NA         | NA          | NA       | FALSE |          |                |
| chr1:43814473   | 1,83E-05 | 1,87E-02 | -0.112 | CDC20        | -10153 | intron     | NA     | 0.333  | MED8          | NA         | NA          | NA       | FALSE |          |                |
| chr22:45099111  | 1,82E-05 | 1,87E-02 | -0.102 | PRR5-ARHGAP8 | 741    | promoter   | NA     | 0.218  | PRR5          | NA         | NA          | NA       | FALSE | promoter | PRR5           |
| chr3:96495772   | 1,86E-05 | 1,87E-02 | -0.167 | EPHA6        | -37653 | intergenic | NA     | NA     | NA            | NA         | NA          | NA       | FALSE |          |                |
| chr10:79395265  | 1,90E-05 | 1,88E-02 | 0.108  | KCNMA1       | 2313   | intron     | NA     | NA     | NA            | NA         | NA          | NA       | FALSE |          |                |
| chr7:22860953   | 1,92E-05 | 1,89E-02 | -0.153 | TOMM7        | 1519   | intron     | 0.133  | -0.262 | FAM126A       | NA         | NA          | NA       | FALSE |          |                |
| chr11:67351944  | 1,97E-05 | 1,90E-02 | -0.103 | GSTP1        | 880    | promoter   | -0.302 | -0.302 | GSTP1         | NA         | NA          | NA       | FALSE |          |                |
| chr1:43814462   | 2,02E-05 | 1,92E-02 | -0.159 | CDC20        | -10164 | intron     | NA     | 0.258  | MED8          | NA         | NA          | NA       | FALSE |          |                |
| chr8:6884591    | 2,04E-05 | 1,94E-02 | -0.111 | DEFA11P      | 2421   | intergenic | NA     | NA     | NA            | NA         | NA          | NA       | FALSE |          |                |
| chr1:43814638   | 2,06E-05 | 1,95E-02 | -0.19  | CDC20        | -9988  | exon       | NA     | 0.295  | MED8          | NA         | NA          | NA       | FALSE |          |                |
| chr16:88453894  | 2,25E-05 | 2,05E-02 | 0.153  | ZNF469       | -39985 | intergenic | NA     | -0.198 | ZC3H18        | NA         | NA          | NA       | FALSE |          |                |



|                 |          |          |        |              |         |            |        |        |              |    |    |       |       |          |
|-----------------|----------|----------|--------|--------------|---------|------------|--------|--------|--------------|----|----|-------|-------|----------|
| chr6:163570230  | 2,32E-05 | 2,09E-02 | -0.158 | AK296276     | 42611   | intron     | NA     | NA     | NA           | NA | NA | FALSE |       |          |
| chr9:137673998  | 2,32E-05 | 2,09E-02 | -0.16  | MIR3689C     | 67218   | intron     | NA     | 0.219  | FCN1         | NA | NA | NA    | FALSE |          |
| chr19:10736170  | 2,36E-05 | 2,12E-02 | -0.145 | SLC44A2      | 0       | promoter   | -0.081 | 0.226  | PDE4A        | NA | NA | NA    | FALSE |          |
| chr6:163570371  | 2,39E-05 | 2,14E-02 | -0.141 | AK296276     | 42470   | intron     | NA     | NA     | NA           | NA | NA | NA    | TRUE  |          |
| chr4:961400     | 2,45E-05 | 2,18E-02 | 0.221  | DGKQ         | 5949    | exon       | 0.342  | 0.342  | DGKQ         | NA | NA | NA    | FALSE |          |
| chr20:55787524  | 2,78E-05 | 2,43E-02 | -0.112 | BMP7         | 54184   | intron     | NA     | 0.185  | RBM38        | NA | NA | NA    | FALSE | enhancer |
| chr3:118892496  | 2,85E-05 | 2,47E-02 | 0.166  | UPK1B        | 73      | promoter   | NA     | -0.033 | B4GALT4      | NA | NA | NA    | FALSE |          |
| chr11:67351952  | 2,88E-05 | 2,49E-02 | -0.102 | GSTP1        | 888     | promoter   | -0.433 | -0.433 | GSTP1        | NA | NA | NA    | FALSE |          |
| chr22:31032485  | 2,98E-05 | 2,53E-02 | 0.143  | SLC35E4      | 694     | promoter   | NA     | -0.199 | PES1         | NA | NA | NA    | FALSE |          |
| chr3:196694100  | 2,99E-05 | 2,53E-02 | -0.101 | PIGZ         | 1605    | intron     | NA     | 0.408  | NCBP2-AS2    | NA | NA | NA    | FALSE |          |
| chr9:137674025  | 3,04E-05 | 2,55E-02 | -0.153 | MIR3689C     | 67191   | intron     | NA     | 0.319  | FCN1         | NA | NA | NA    | FALSE |          |
| chr1:2989648    | 3,14E-05 | 2,61E-02 | -0.105 | PRDM16       | 3908    | intron     | NA     | NA     | NA           | NA | NA | NA    | FALSE | promoter |
| chr6:26305203   | 3,17E-05 | 2,63E-02 | 0.11   | TRNA_Ser     | 599     | promoter   | NA     | 0.253  | BTN3A3       | NA | NA | NA    | FALSE | enhancer |
| chr19:46915553  | 3,21E-05 | 2,63E-02 | 0.152  | CCDC8        | 1367    | exon       | NA     | -0.179 | PPPS5        | NA | NA | NA    | FALSE |          |
| chr8:60032942   | 3,20E-05 | 2,63E-02 | 0.113  | TOX          | -1176   | intergenic | 0.011  | -0.314 | RP11-25K19.1 | NA | NA | NA    | FALSE |          |
| chr14:19889020  | 3,37E-05 | 2,68E-02 | -0.119 | LINC00516    | -5349   | intron     | NA     | NA     | NA           | NA | NA | NA    | FALSE |          |
| chr19:46774424  | 3,36E-05 | 2,68E-02 | 0.16   | HIF3A        | -25879  | intron     | NA     | -0.166 | PPPS5        | NA | NA | NA    | FALSE | enhancer |
| chr19:37807939  | 3,74E-05 | 2,79E-02 | 0.163  | HKR1         | -874    | promoter   | -0.32  | -0.387 | ZNF540       | NA | NA | NA    | FALSE |          |
| chr10:126475023 | 3,75E-05 | 2,79E-02 | 0.129  | FAM53B       | 3885    | intron     | 0.285  | 0.285  | FAM53B       | NA | NA | NA    | FALSE |          |
| chr8:60032900   | 3,94E-05 | 2,88E-02 | 0.103  | TOX          | -1134   | intergenic | -0.157 | -0.434 | RP11-25K19.1 | NA | NA | NA    | FALSE |          |
| chr20:62570570  | 4,02E-05 | 2,92E-02 | 0.151  | MIR1914      | 2328    | intergenic | NA     | 0.271  | RGS19        | NA | NA | NA    | FALSE |          |
| chr4:132897079  | 4,15E-05 | 3,00E-02 | -0.103 | BC131768     | 247828  | intergenic | NA     | NA     | NA           | NA | NA | NA    | FALSE |          |
| chr9:137673894  | 4,31E-05 | 3,07E-02 | -0.18  | MIR3689C     | 67322   | intron     | NA     | 0.378  | FCN1         | NA | NA | NA    | TRUE  |          |
| chr17:72916021  | 4,45E-05 | 3,13E-02 | 0.174  | USH1G        | 3331    | exon       | NA     | 0.367  | ATP5H        | NA | NA | NA    | FALSE |          |
| chr4:962384     | 4,66E-05 | 3,25E-02 | 0.136  | DGKQ         | 4965    | intron     | 0.508  | 0.508  | DGKQ         | NA | NA | NA    | FALSE |          |
| chr16:2848679   | 4,69E-05 | 3,26E-02 | 0.144  | PRSS41       | 195     | promoter   | NA     | 0.457  | PRSS21       | NA | NA | NA    | FALSE |          |
| chr6:8436263    | 4,79E-05 | 3,30E-02 | 0.175  | LOC100506207 | 409     | promoter   | NA     | -0.035 | SLC35B3      | NA | NA | NA    | TRUE  |          |
| chr19:37807753  | 5,14E-05 | 3,48E-02 | 0.181  | HKR1         | -1060   | intron     | -0.278 | -0.345 | ZNF383       | NA | NA | NA    | FALSE |          |
| chr6:13860701   | 5,17E-05 | 3,48E-02 | -0.171 | Mir_548      | 45070   | intergenic | NA     | -0.204 | NA           | NA | NA | NA    | FALSE |          |
| chr15:20374137  | 5,31E-05 | 3,54E-02 | -0.158 | BC107108     | 11451   | intergenic | NA     | NA     | NA           | NA | NA | NA    | FALSE |          |
| chr10:79395468  | 5,34E-05 | 3,55E-02 | 0.108  | KCNMA1       | 2110    | intron     | NA     | NA     | NA           | NA | NA | NA    | FALSE |          |
| chr15:98195837  | 5,62E-05 | 3,68E-02 | 0.113  | BC024169     | -114382 | intergenic | NA     | NA     | NA           | NA | NA | NA    | FALSE |          |
| chr22:39633541  | 5,73E-05 | 3,72E-02 | 0.147  | PDGFB        | 3374    | intron     | NA     | -0.225 | APOBEC3D     | NA | NA | NA    | FALSE |          |
| chr22:26323710  | 5,99E-05 | 3,79E-02 | -0.273 | MYO18B       | -27435  | intron     | NA     | NA     | NA           | NA | NA | NA    | FALSE |          |
| chr1:43814632   | 6,11E-05 | 3,82E-02 | -0.19  | CDC20        | -9994   | exon       | NA     | 0.319  | MED8         | NA | NA | NA    | FALSE |          |
| chr17:135302    | 6,17E-05 | 3,85E-02 | 0.118  | RPH3AL       | 42069   | intron     | NA     | -0.077 | FAM101B      | NA | NA | NA    | FALSE |          |
| chr8:145733678  | 6,30E-05 | 3,90E-02 | 0.109  | MFSD3        | -874    | promoter   | 0.156  | 0.201  | RECQL4       | NA | NA | NA    | FALSE | promoter |
| chr12:92029279  | 6,33E-05 | 3,91E-02 | -0.132 | DCN          | -452474 | intergenic | NA     | NA     | NA           | NA | NA | NA    | FALSE |          |
| chr4:160303530  | 7,08E-05 | 4,17E-02 | 0.133  | RAPGEF2      | 114534  | intergenic | -0.055 | NA     | NA           | NA | NA | NA    | FALSE |          |
| chr14:101195081 | 7,23E-05 | 4,18E-02 | 0.172  | DLK1         | 1881    | intron     | NA     | NA     | NA           | NA | NA | NA    | FALSE |          |
| chr4:961599     | 7,29E-05 | 4,18E-02 | 0.127  | DGKQ         | 5750    | intron     | 0.619  | 0.619  | DGKQ         | NA | NA | NA    | FALSE |          |
| chr7:22861019   | 7,40E-05 | 4,22E-02 | -0.134 | TOMM7        | 1453    | intron     | 0.174  | -0.325 | FAM126A      | NA | NA | NA    | FALSE |          |
| chr18:60278825  | 7,44E-05 | 4,23E-02 | 0.123  | DKFZp451A185 | 29789   | intergenic | NA     | 0.228  | ZCCHC2       | NA | NA | NA    | FALSE |          |
| chr18:77398374  | 7,44E-05 | 4,23E-02 | 0.121  | CTDP1        | -41427  | intergenic | 0.056  | 0.095  | NFATC1       | NA | NA | NA    | FALSE |          |
| chr22:49447830  | 7,62E-05 | 4,30E-02 | 0.244  | LOC100128946 | 185250  | intergenic | NA     | NA     | NA           | NA | NA | NA    | FALSE |          |
| chr7:154585853  | 7,74E-05 | 4,36E-02 | -0.164 | LOC100132707 | -134374 | exon       | NA     | -0.313 | RP11-5C23.1  | NA | NA | NA    | FALSE |          |
| chr14:103227458 | 7,89E-05 | 4,41E-02 | -0.134 | TRAF3        | -16358  | intergenic | 0.335  | 0.335  | TRAF3        | NA | NA | NA    | FALSE |          |
| chr20:47013321  | 8,38E-05 | 4,58E-02 | -0.173 | LINC00494    | 18933   | intergenic | NA     | NA     | NA           | NA | NA | NA    | FALSE |          |
| chr19:37807898  | 8,62E-05 | 4,66E-02 | 0.138  | HKR1         | -915    | promoter   | -0.237 | -0.408 | ZNF383       | NA | NA | NA    | FALSE |          |
| chr8:42052734   | 8,74E-05 | 4,71E-02 | -0.156 | PLAT         | -2006   | intron     | NA     | 0.288  | KAT6A        | NA | NA | NA    | FALSE |          |
| chr1:178456076  | 8,93E-05 | 4,76E-02 | 0.112  | TEX35        | -26136  | intergenic | NA     | -0.027 | RP11-428K3.1 | NA | NA | NA    | FALSE |          |
| chr18:60278823  | 8,92E-05 | 4,76E-02 | 0.127  | DKFZp451A185 | 29787   | intergenic | NA     | 0.233  | ZCCHC2       | NA | NA | NA    | FALSE |          |

|                        |          |          |        |                     |         |            |        |        |                   |    |    |    |       |
|------------------------|----------|----------|--------|---------------------|---------|------------|--------|--------|-------------------|----|----|----|-------|
| chr21:45565995         | 8,95E-05 | 4,76E-02 | 0.146  | <i>C21orf33</i>     | 12503   | intergenic | -0.056 | -0.375 | <i>PFKL</i>       | NA | NA | NA | FALSE |
| <b>chr22:25174843</b>  | 9,08E-05 | 4,79E-02 | -0.121 | <i>PIWIL3</i>       | -4157   | intergenic | NA     | -0.443 | <i>GGT1</i>       | NA | NA | NA | FALSE |
| chr21:46677404         | 9,13E-05 | 4,79E-02 | 0.231  | <i>POFUT2</i>       | 19922   | intron     | 0.013  | -0.167 | <i>ADARB1</i>     | NA | NA | NA | FALSE |
| chr12:32626644         | 9,79E-05 | 4,94E-02 | -0.28  | <i>FGD4</i>         | -12262  | intergenic | NA     | -0.325 | <i>DNM1L</i>      | NA | NA | NA | FALSE |
| chr16:89150862         | 9,85E-05 | 4,94E-02 | -0.16  | <i>ACSF3</i>        | -9355   | intergenic | -0.054 | 0.188  | <i>AC137932.5</i> | NA | NA | NA | FALSE |
| chr19:37807937         | 9,93E-05 | 4,95E-02 | 0.176  | <i>HKR1</i>         | -876    | promoter   | -0.228 | -0.404 | <i>ZNF570</i>     | NA | NA | NA | FALSE |
| chr1:178456064         | 1,08E-04 | 5,18E-02 | 0.103  | <i>TEX35</i>        | -26148  | intergenic | NA     | -0.039 | <i>RALGPS2</i>    | NA | NA | NA | FALSE |
| chr13:20711574         | 1,08E-04 | 5,18E-02 | 0.137  | <i>GJA3</i>         | 5854    | intergenic | NA     | 0.224  | <i>GJB6</i>       | NA | NA | NA | TRUE  |
| chr8:144809551         | 1,09E-04 | 5,19E-02 | 0.202  | <i>FAM83H</i>       | 3520    | exon       | NA     | -0.467 | <i>NAPRT1</i>     | NA | NA | NA | FALSE |
| chr4:132897000         | 1,11E-04 | 5,24E-02 | -0.139 | <i>BC131768</i>     | 247749  | intergenic | NA     | NA     | <i>NA</i>         | NA | NA | NA | FALSE |
| chr7:22861114          | 1,12E-04 | 5,24E-02 | -0.19  | <i>TOMM7</i>        | 1358    | intron     | 0.217  | -0.337 | <i>FAM126A</i>    | NA | NA | NA | FALSE |
| chr16:89050592         | 1,15E-04 | 5,34E-02 | 0.162  | <i>CBFA2T3</i>      | -7089   | intergenic | NA     | 0.221  | <i>CDT1</i>       | NA | NA | NA | FALSE |
| chr22:49447896         | 1,16E-04 | 5,34E-02 | 0.257  | <i>LOC100128946</i> | 185316  | intergenic | NA     | NA     | <i>NA</i>         | NA | NA | NA | FALSE |
| chr19:37807945         | 1,18E-04 | 5,38E-02 | 0.121  | <i>HKR1</i>         | -868    | promoter   | -0.241 | -0.437 | <i>ZNF383</i>     | NA | NA | NA | FALSE |
| chr16:32290350         | 1,21E-04 | 5,46E-02 | -0.108 | <i>LOC390705</i>    | 10953   | intergenic | NA     | NA     | <i>NA</i>         | NA | NA | NA | FALSE |
| chr20:47013360         | 1,21E-04 | 5,46E-02 | -0.119 | <i>LINC00494</i>    | 18972   | intergenic | NA     | NA     | <i>NA</i>         | NA | NA | NA | FALSE |
| chr4:962204            | 1,22E-04 | 5,46E-02 | 0.226  | <i>DGKQ</i>         | 5145    | intron     | 0.43   | 0.43   | <i>DGKQ</i>       | NA | NA | NA | FALSE |
| chr6:163570381         | 1,22E-04 | 5,46E-02 | -0.161 | <i>AK296276</i>     | 42460   | intron     | NA     | NA     | <i>NA</i>         | NA | NA | NA | FALSE |
| chr12:133414426        | 1,26E-04 | 5,56E-02 | 0.16   | <i>GOLGA3</i>       | -9001   | intergenic | -0.098 | -0.302 | <i>CHFR</i>       | NA | NA | NA | FALSE |
| chr18:60278889         | 1,25E-04 | 5,56E-02 | 0.144  | <i>DKFZp451A185</i> | 29853   | intergenic | NA     | 0.209  | <i>ZCCHC2</i>     | NA | NA | NA | FALSE |
| chr16:89150998         | 1,29E-04 | 5,64E-02 | -0.143 | <i>ACSF3</i>        | -9219   | intergenic | -0.238 | 0.326  | <i>TRAPPC2L</i>   | NA | NA | NA | FALSE |
| chr7:76129434          | 1,29E-04 | 5,64E-02 | -0.165 | <i>DTX2</i>         | 317     | promoter   | -0.471 | -0.539 | <i>UPK3B</i>      | NA | NA | NA | FALSE |
| <b>chr17:15517405</b>  | 1,38E-04 | 5,86E-02 | 0.298  | <i>CDRT1</i>        | 5614    | intron     | NA     | 0.318  | <i>ZNF286A</i>    | NA | NA | NA | FALSE |
| chr21:46714776         | 1,42E-04 | 5,88E-02 | -0.123 | <i>LOC642852</i>    | 6797    | exon       | NA     | -0.497 | <i>POFUT2</i>     | NA | NA | NA | FALSE |
| chr17:72916084         | 1,45E-04 | 5,96E-02 | 0.173  | <i>USH1G</i>        | 3268    | exon       | NA     | 0.378  | <i>ATP5H</i>      | NA | NA | NA | FALSE |
| chr9:136075442         | 1,47E-04 | 6,01E-02 | 0.111  | <i>OBP2B</i>        | 9187    | intergenic | NA     | -0.308 | <i>CACFD1</i>     | NA | NA | NA | FALSE |
| chr6:163570616         | 1,48E-04 | 6,05E-02 | -0.117 | <i>AK296276</i>     | 42225   | intron     | NA     | NA     | <i>NA</i>         | NA | NA | NA | FALSE |
| chr21:46714693         | 1,53E-04 | 6,19E-02 | -0.104 | <i>LOC642852</i>    | 6714    | exon       | NA     | -0.414 | <i>POFUT2</i>     | NA | NA | NA | FALSE |
| <b>chr7:128561507</b>  | 1,61E-04 | 6,37E-02 | 0.107  | <i>KCP</i>          | -10735  | intergenic | NA     | 0.374  | <i>CALU</i>       | NA | NA | NA | FALSE |
| chr2:113192585         | 1,72E-04 | 6,65E-02 | 0.11   | <i>RGPD8</i>        | -524    | promoter   | 0.164  | 0.311  | <i>SLC20A1</i>    | NA | NA | NA | FALSE |
| chr4:961427            | 1,72E-04 | 6,66E-02 | 0.185  | <i>DGKQ</i>         | 5922    | exon       | 0.259  | 0.259  | <i>DGKQ</i>       | NA | NA | NA | FALSE |
| chr22:49447907         | 1,83E-04 | 6,96E-02 | 0.288  | <i>LOC100128946</i> | 185327  | intergenic | NA     | NA     | <i>NA</i>         | NA | NA | NA | FALSE |
| chr16:32289963         | 1,84E-04 | 6,96E-02 | -0.108 | <i>LOC390705</i>    | 11340   | intergenic | NA     | NA     | <i>NA</i>         | NA | NA | NA | FALSE |
| chr4:8890133           | 1,89E-04 | 7,06E-02 | 0.151  | <i>HMX1</i>         | -16591  | intergenic | NA     | NA     | <i>NA</i>         | NA | NA | NA | FALSE |
| <b>chr12:125242855</b> | 2,03E-04 | 7,39E-02 | 0.494  | <i>JB074994</i>     | -39454  | intergenic | NA     | -0.214 | <i>DHX37</i>      | NA | NA | NA | FALSE |
| chr22:49442398         | 2,03E-04 | 7,40E-02 | -0.109 | <i>LOC100128946</i> | 179818  | intergenic | NA     | NA     | <i>NA</i>         | NA | NA | NA | FALSE |
| <b>chr10:79376361</b>  | 2,11E-04 | 7,56E-02 | -0.319 | <i>JB149426</i>     | 2204    | intron     | NA     | NA     | <i>NA</i>         | NA | NA | NA | FALSE |
| chr19:1466099          | 2,13E-04 | 7,59E-02 | 0.176  | <i>C19orf25</i>     | 13130   | exon       | 0.132  | 0.287  | <i>ATP5D</i>      | NA | NA | NA | FALSE |
| chr5:3606057           | 2,14E-04 | 7,61E-02 | 0.101  | <i>IRX1</i>         | 9891    | intergenic | NA     | NA     | <i>NA</i>         | NA | NA | NA | FALSE |
| chr18:60278808         | 2,15E-04 | 7,61E-02 | 0.11   | <i>DKFZp451A185</i> | 29772   | intergenic | NA     | 0.406  | <i>ZCCHC2</i>     | NA | NA | NA | FALSE |
| chr19:58571386         | 2,16E-04 | 7,64E-02 | 0.107  | <i>ZNF135</i>       | 781     | promoter   | NA     | -0.327 | <i>ZNF417</i>     | NA | NA | NA | FALSE |
| chr19:37807657         | 2,23E-04 | 7,76E-02 | 0.136  | <i>HKR1</i>         | -1156   | intron     | -0.089 | -0.267 | <i>ZNF570</i>     | NA | NA | NA | FALSE |
| chr21:47307758         | 2,25E-04 | 7,82E-02 | -0.21  | <i>PCBP3</i>        | -8364   | intron     | -0.537 | -0.537 | <i>PCBP3</i>      | NA | NA | NA | FALSE |
| chr1:149287263         | 2,30E-04 | 7,91E-02 | -0.115 | <i>BC023516</i>     | -188    | promoter   | NA     | 0.15   | <i>NA</i>         | NA | NA | NA | FALSE |
| chr12:92029135         | 2,33E-04 | 7,93E-02 | -0.138 | <i>DCN</i>          | -452330 | intergenic | NA     | NA     | <i>NA</i>         | NA | NA | NA | FALSE |
| <b>chr13:99803949</b>  | 2,37E-04 | 8,00E-02 | 0.149  | <i>UBAC2</i>        | -48730  | intergenic | 0.015  | -0.271 | <i>GPR18</i>      | NA | NA | NA | FALSE |
| chr2:113192407         | 2,38E-04 | 8,02E-02 | 0.104  | <i>RGPD8</i>        | -346    | promoter   | -0.079 | 0.264  | <i>TTL</i>        | NA | NA | NA | FALSE |
| chr4:81128366          | 2,54E-04 | 8,32E-02 | -0.109 | <i>PRDM8</i>        | 9711    | intergenic | 0.093  | -0.159 | <i>AMTXR2</i>     | NA | NA | NA | FALSE |
| chr3:194705981         | 2,55E-04 | 8,33E-02 | -0.102 | <i>XXYL1</i>        | 136944  | intergenic | 0.043  | NA     | <i>NA</i>         | NA | NA | NA | FALSE |
| chr7:158111329         | 2,57E-04 | 8,36E-02 | 0.128  | <i>MIR595</i>       | 214177  | intron     | NA     | NA     | <i>NA</i>         | NA | NA | NA | TRUE  |
| chr22:26323697         | 2,64E-04 | 8,48E-02 | -0.113 | <i>MYO18B</i>       | -27448  | intron     | NA     | NA     | <i>NA</i>         | NA | NA | NA | FALSE |
| chr17:72916093         | 2,67E-04 | 8,51E-02 | 0.181  | <i>USH1G</i>        | 3259    | exon       | NA     | 0.455  | <i>KCTD2</i>      | NA | NA | NA | FALSE |

|                        |          |          |        |                  |         |            |        |        |                      |    |    |    |       |          |                               |          |                          |
|------------------------|----------|----------|--------|------------------|---------|------------|--------|--------|----------------------|----|----|----|-------|----------|-------------------------------|----------|--------------------------|
| <b>chr22:19751804</b>  | 2,70E-04 | 8,56E-02 | 0.115  | <i>TBX1</i>      | 7580    | exon       | NA     | 0.085  | <i>COMT</i>          | NA | NA | NA | FALSE | enhancer | <i>RPL7AP70, TBX1, RPL8P5</i> |          |                          |
| chr6:163570442         | 2,71E-04 | 8,56E-02 | -0.169 | <i>AK296276</i>  | 42399   | intron     | NA     | NA     | <i>NA</i>            | NA | NA | NA | FALSE |          |                               |          |                          |
| chr16:89050558         | 2,74E-04 | 8,60E-02 | 0.14   | <i>CBFA2T3</i>   | -7055   | intergenic | NA     | 0.119  | <i>CDT1</i>          | NA | NA | NA | FALSE |          |                               |          |                          |
| chr22:17199120         | 2,78E-04 | 8,69E-02 | -0.187 | <i>BC038197</i>  | 30209   | intergenic | NA     | -0.088 | <i>TPTEP1</i>        | NA | NA | NA | FALSE |          |                               |          |                          |
| chr19:37807762         | 2,79E-04 | 8,70E-02 | 0.139  | <i>HKR1</i>      | -1051   | intron     | -0.182 | -0.344 | <i>ZNF540</i>        | NA | NA | NA | FALSE |          |                               |          |                          |
| chr21:47307812         | 2,83E-04 | 8,77E-02 | -0.273 | <i>PCBP3</i>     | -8310   | intron     | -0.49  | -0.49  | <i>PCBP3</i>         | NA | NA | NA | FALSE |          |                               |          |                          |
| chr21:47307815         | 2,83E-04 | 8,77E-02 | -0.203 | <i>PCBP3</i>     | -8307   | intron     | -0.495 | -0.495 | <i>PCBP3</i>         | NA | NA | NA | FALSE |          |                               |          |                          |
| <b>chr8:2670073</b>    | 2,84E-04 | 8,77E-02 | -0.116 | <i>AK128880</i>  | -84117  | intergenic | NA     | NA     | <i>NA</i>            | NA | NA | NA | FALSE |          |                               |          |                          |
| <b>chr12:116978050</b> | 2,87E-04 | 8,80E-02 | -0.238 | <i>LINC00173</i> | 6812    | intergenic | NA     | -0.11  | <i>C12orf49</i>      | NA | NA | NA | FALSE |          |                               | enhancer | <i>MED13L, LINC00173</i> |
| chr4:81128495          | 2,93E-04 | 8,95E-02 | -0.126 | <i>PRDM8</i>     | 9840    | intergenic | 0.024  | -0.037 | <i>ANTXR2</i>        | NA | NA | NA | FALSE |          |                               |          |                          |
| chr22:44530074         | 2,93E-04 | 8,95E-02 | 0.16   | <i>TRNA_SeC</i>  | -16463  | intron     | NA     | 0.064  | <i>PARVB</i>         | NA | NA | NA | FALSE |          |                               |          |                          |
| <b>chr6:110904825</b>  | 3,00E-04 | 9,07E-02 | 0.452  | <i>CDK19</i>     | 59697   | intergenic | 0.158  | 0.158  | <i>CDK19</i>         | NA | NA | NA | FALSE |          |                               |          |                          |
| chr21:46714714         | 3,09E-04 | 9,18E-02 | -0.103 | <i>LOC642852</i> | 6735    | exon       | NA     | -0.365 | <i>POFUT2</i>        | NA | NA | NA | FALSE |          |                               |          |                          |
| chr15:98195852         | 3,21E-04 | 9,36E-02 | 0.114  | <i>BC024169</i>  | -114397 | intergenic | NA     | NA     | <i>NA</i>            | NA | NA | NA | FALSE |          |                               |          |                          |
| chr19:46915556         | 3,22E-04 | 9,37E-02 | 0.146  | <i>CCDC8</i>     | 1364    | exon       | NA     | 0.289  | <i>CALM3</i>         | NA | NA | NA | FALSE |          |                               |          |                          |
| chr21:47307753         | 3,25E-04 | 9,44E-02 | -0.227 | <i>PCBP3</i>     | -8369   | intron     | -0.489 | -0.489 | <i>PCBP3</i>         | NA | NA | NA | FALSE |          |                               |          |                          |
| chr8:144788642         | 3,32E-04 | 9,52E-02 | 0.227  | <i>CCDC166</i>   | 1638    | intron     | NA     | -0.238 | <i>RP11-661A12.7</i> | NA | NA | NA | FALSE |          |                               |          |                          |
| chr5:131607542         | 3,33E-04 | 9,56E-02 | 0.142  | <i>PDLIM4</i>    | 14193   | exon       | NA     | -0.41  | <i>C5orf56</i>       | NA | NA | NA | FALSE |          |                               |          |                          |
| chr7:76129418          | 3,35E-04 | 9,59E-02 | -0.164 | <i>DTX2</i>      | 301     | promoter   | -0.416 | -0.466 | <i>UPK3B</i>         | NA | NA | NA | FALSE |          |                               |          |                          |
| chr21:47307737         | 3,42E-04 | 9,71E-02 | -0.223 | <i>PCBP3</i>     | -8385   | intron     | -0.476 | -0.476 | <i>PCBP3</i>         | NA | NA | NA | FALSE |          |                               |          |                          |
| chr21:47308375         | 3,46E-04 | 9,76E-02 | -0.244 | <i>PCBP3</i>     | -7747   | intron     | -0.537 | -0.537 | <i>PCBP3</i>         | NA | NA | NA | FALSE |          |                               |          |                          |
| chr1:228659210         | 3,49E-04 | 9,79E-02 | 0.109  | <i>Histone3</i>  | -7320   | intergenic | NA     | 0.154  | <i>RHO</i>           | NA | NA | NA | FALSE |          |                               |          |                          |
| <b>chr1:55246878</b>   | 3,54E-04 | 9,87E-02 | 0.123  | <i>PARS2</i>     | -16653  | exon       | NA     | 0.196  | <i>TTC22</i>         | NA | NA | NA | FALSE |          |                               |          |                          |

Standalone differentially methylated CpGs, which are not part of differentially methylated regions, are marked with red color.

**ESM Table 4. Differentially methylated CpGs identified in the CD8<sup>+</sup>T cell fraction between cases and controls in all longitudinal samples**

| Methylation difference |          |          |                        | Nearest gene        |                          |              | Methylation-expression correlation analysis |                                                |                      | eQTM analysis |           |                 |                   | GeneHancer database |                                             |
|------------------------|----------|----------|------------------------|---------------------|--------------------------|--------------|---------------------------------------------|------------------------------------------------|----------------------|---------------|-----------|-----------------|-------------------|---------------------|---------------------------------------------|
| CpG site               | P value  | FDR      | Methylation difference | Nearest gene        | Distance to nearest gene | Genomic part | Nearest gene correlation, Spearman rho      | The highest observed correlation, Spearman rho | Correlating gene     | CpG name      | eQTM, FDR | Overall Z Score | CpG found on 450K | Genehancer          | Genes possibly regulated by standalone DMCS |
| chr16:32289963         | 5,21E-11 | 1,27E-05 | -0.13                  | <i>LOC390705</i>    | 11340                    | intergenic   | NA                                          | NA                                             | <i>NA</i>            | NA            | NA        | NA              | FALSE             |                     |                                             |
| chr2:27038339          | 2,78E-10 | 4,31E-05 | -0.186                 | <i>CENPA</i>        | 29459                    | intergenic   | NA                                          | -0.092                                         | <i>TMEM214</i>       | NA            | NA        | NA              | FALSE             |                     |                                             |
| <b>chr9:79557441</b>   | 5,37E-10 | 7,04E-05 | 0.154                  | <i>PRUNE2</i>       | -36439                   | intergenic   | NA                                          | -0.066                                         | <i>VPS13A</i>        | NA            | NA        | NA              | FALSE             |                     |                                             |
| chr14:45343058         | 8,55E-10 | 9,11E-05 | -0.207                 | <i>C14orf28</i>     | -23449                   | intergenic   | 0.085                                       | -0.259                                         | <i>FAM179B</i>       | NA            | NA        | NA              | FALSE             |                     |                                             |
| chr16:433855           | 1,14E-09 | 1,08E-04 | -0.13                  | <i>LOC100134368</i> | 1616                     | intron       | NA                                          | -0.538                                         | <i>TMEM8A</i>        | NA            | NA        | NA              | FALSE             |                     |                                             |
| chr22:39633525         | 1,14E-09 | 1,08E-04 | 0.152                  | <i>PDGFB</i>        | 3390                     | intron       | NA                                          | -0.222                                         | <i>CBX7</i>          | NA            | NA        | NA              | FALSE             |                     |                                             |
| chr7:3169658           | 3,27E-09 | 2,65E-04 | 0.191                  | <i>BC038729</i>     | 44630                    | intergenic   | NA                                          | 0.018                                          | <i>CARD11</i>        | NA            | NA        | NA              | FALSE             |                     |                                             |
| chr16:58534501         | 6,77E-09 | 4,44E-04 | 0.121                  | <i>NDRG4</i>        | 456                      | promoter     | NA                                          | -0.229                                         | <i>GOT2</i>          | NA            | NA        | NA              | FALSE             |                     |                                             |
| chr1:145385334         | 1,02E-08 | 5,82E-04 | 0.165                  | <i>TRNA_Asn</i>     | -395                     | promoter     | NA                                          | -0.419                                         | <i>PIAS3</i>         | NA            | NA        | NA              | TRUE              |                     |                                             |
| chr16:8960779          | 1,59E-08 | 8,76E-04 | -0.118                 | <i>CARHSP1</i>      | 507                      | promoter     | 0.128                                       | 0.146                                          | <i>TMEM186</i>       | NA            | NA        | NA              | FALSE             |                     |                                             |
| chr14:101194894        | 1,69E-08 | 8,85E-04 | 0.258                  | <i>DLX1</i>         | 1694                     | intron       | NA                                          | NA                                             | <i>NA</i>            | NA            | NA        | NA              | FALSE             |                     |                                             |
| <b>chr17:16649246</b>  | 1,82E-08 | 8,85E-04 | -0.136                 | <i>USP32P1</i>      | 34255                    | intron       | NA                                          | -0.121                                         | <i>ZNF624</i>        | NA            | NA        | NA              | TRUE              |                     |                                             |
| chr3:196694364         | 1,81E-08 | 8,85E-04 | -0.191                 | <i>PIGZ</i>         | 1341                     | intron       | NA                                          | -0.183                                         | <i>AC127904.2</i>    | NA            | NA        | NA              | FALSE             |                     |                                             |
| <b>chr21:10597321</b>  | 2,41E-08 | 1,05E-03 | -0.16                  | <i>AK311573</i>     | 122                      | promoter     | NA                                          | NA                                             | <i>NA</i>            | NA            | NA        | NA              | FALSE             |                     |                                             |
| chr8:144788642         | 3,95E-08 | 1,38E-03 | 0.267                  | <i>CCDC166</i>      | 1638                     | intron       | NA                                          | 0.216                                          | <i>GSDMD</i>         | NA            | NA        | NA              | FALSE             |                     |                                             |
| <b>chr2:129160452</b>  | 4,46E-08 | 1,52E-03 | -0.213                 | <i>HS6ST1</i>       | -84282                   | intergenic   | -0.08                                       | -0.08                                          | <i>HS6ST1</i>        | NA            | NA        | NA              | FALSE             |                     |                                             |
| chr2:27038368          | 7,85E-08 | 2,35E-03 | -0.171                 | <i>CENPA</i>        | 29488                    | intergenic   | NA                                          | -0.105                                         | <i>TMEM214</i>       | NA            | NA        | NA              | FALSE             |                     |                                             |
| <b>chr15:20374137</b>  | 1,12E-07 | 2,99E-03 | -0.105                 | <i>BC107108</i>     | 11451                    | intergenic   | NA                                          | NA                                             | <i>NA</i>            | NA            | NA        | NA              | FALSE             |                     |                                             |
| <b>chr10:35102729</b>  | 1,19E-07 | 3,13E-03 | -0.109                 | <i>PARD3</i>        | 1525                     | intron       | NA                                          | NA                                             | <i>NA</i>            | NA            | NA        | NA              | FALSE             | promoter            | <i>PARD3, PARD3-AS1</i>                     |
| <b>chr5:177629492</b>  | 1,23E-07 | 3,14E-03 | -0.15                  | <i>HNRNPAB</i>      | -2016                    | intergenic   | 0.041                                       | 0.267                                          | <i>N4BP3</i>         | NA            | NA        | NA              | FALSE             |                     |                                             |
| chr1:145385336         | 1,35E-07 | 3,40E-03 | 0.135                  | <i>TRNA_Asn</i>     | -393                     | promoter     | NA                                          | -0.43                                          | <i>PIAS3</i>         | NA            | NA        | NA              | FALSE             |                     |                                             |
| chr12:116978050        | 1,43E-07 | 3,47E-03 | -0.229                 | <i>LINC00173</i>    | 6812                     | intergenic   | NA                                          | 0.063                                          | <i>C12orf49</i>      | NA            | NA        | NA              | FALSE             |                     |                                             |
| chr16:3116115          | 1,68E-07 | 3,82E-03 | -0.141                 | <i>IL32</i>         | 332                      | promoter     | -0.117                                      | 0.285                                          | <i>ZNF200</i>        | NA            | NA        | NA              | FALSE             |                     |                                             |
| chr5:3605712           | 2,16E-07 | 4,67E-03 | 0.139                  | <i>IRX1</i>         | 9546                     | intergenic   | NA                                          | NA                                             | <i>NA</i>            | NA            | NA        | NA              | FALSE             |                     |                                             |
| chr3:196694286         | 2,94E-07 | 5,90E-03 | -0.183                 | <i>PIGZ</i>         | 1419                     | intron       | NA                                          | -0.218                                         | <i>AC127904.2</i>    | NA            | NA        | NA              | FALSE             |                     |                                             |
| chr18:844167           | 3,13E-07 | 6,14E-03 | -0.134                 | <i>YES1</i>         | -31626                   | intergenic   | 0.206                                       | -0.394                                         | <i>ENOSF1</i>        | NA            | NA        | NA              | FALSE             |                     |                                             |
| chr16:3116143          | 3,26E-07 | 6,25E-03 | -0.13                  | <i>IL32</i>         | 360                      | promoter     | -0.101                                      | -0.334                                         | <i>ZNF213-AS1</i>    | NA            | NA        | NA              | FALSE             |                     |                                             |
| chr2:27038313          | 3,31E-07 | 6,27E-03 | -0.178                 | <i>CENPA</i>        | 29433                    | intergenic   | NA                                          | -0.074                                         | <i>TMEM214</i>       | NA            | NA        | NA              | TRUE              |                     |                                             |
| chr3:196694318         | 3,38E-07 | 6,33E-03 | -0.166                 | <i>PIGZ</i>         | 1387                     | intron       | NA                                          | -0.235                                         | <i>AC127904.2</i>    | NA            | NA        | NA              | FALSE             |                     |                                             |
| chr7:2060040           | 4,39E-07 | 7,92E-03 | 0.13                   | <i>MAD1L1</i>       | -79856                   | intron       | 0.071                                       | -0.116                                         | <i>FTSJ2</i>         | NA            | NA        | NA              | TRUE              |                     |                                             |
| chr1:145385315         | 4,68E-07 | 8,23E-03 | 0.206                  | <i>TRNA_Asn</i>     | -414                     | promoter     | NA                                          | -0.427                                         | <i>PIAS3</i>         | NA            | NA        | NA              | FALSE             |                     |                                             |
| <b>chr16:121845</b>    | 5,11E-07 | 8,81E-03 | -0.162                 | <i>RHBDF1</i>       | 785                      | promoter     | NA                                          | -0.271                                         | <i>LUC7L</i>         | NA            | NA        | NA              | FALSE             | promoter            | <i>PRL3, MPG, RHBDF1</i>                    |
| chr10:1416953          | 6,03E-07 | 1,00E-02 | -0.147                 | <i>ADARB2-AS1</i>   | -151872                  | intron       | NA                                          | NA                                             | <i>NA</i>            | NA            | NA        | NA              | FALSE             |                     |                                             |
| <b>chr20:2280332</b>   | 6,05E-07 | 1,00E-02 | 0.117                  | <i>TGM3</i>         | 3721                     | intron       | NA                                          | 0.229                                          | <i>STK35</i>         | NA            | NA        | NA              | FALSE             |                     |                                             |
| chr6:158631165         | 6,72E-07 | 1,06E-02 | -0.161                 | <i>GTF2H5</i>       | 41788                    | intergenic   | -0.083                                      | -0.21                                          | <i>SYNJ2</i>         | NA            | NA        | NA              | FALSE             |                     |                                             |
| <b>chr20:2690396</b>   | 8,53E-07 | 1,26E-02 | -0.15                  | <i>EBF4</i>         | 16874                    | intron       | 0.034                                       | 0.233                                          | <i>VPS16</i>         | NA            | NA        | NA              | FALSE             |                     |                                             |
| chr22:49447718         | 8,76E-07 | 1,28E-02 | 0.118                  | <i>LOC100128946</i> | 185138                   | intergenic   | NA                                          | NA                                             | <i>NA</i>            | NA            | NA        | NA              | FALSE             |                     |                                             |
| chr10:118885566        | 9,29E-07 | 1,34E-02 | -0.144                 | <i>KIAA1598</i>     | 532                      | promoter     | NA                                          | -0.143                                         | <i>SLC18A2</i>       | NA            | NA        | NA              | FALSE             |                     |                                             |
| chr11:118842764        | 9,67E-07 | 1,37E-02 | 0.118                  | <i>FOXR1</i>        | 349                      | promoter     | NA                                          | 0.316                                          | <i>RPS25</i>         | NA            | NA        | NA              | FALSE             |                     |                                             |
| chr2:113192534         | 1,08E-06 | 1,50E-02 | 0.128                  | <i>RGPD8</i>        | -473                     | promoter     | -0.127                                      | -0.127                                         | <i>RGPD8</i>         | NA            | NA        | NA              | FALSE             |                     |                                             |
| <b>chr17:42733527</b>  | 1,11E-06 | 1,54E-02 | -0.166                 | <i>C17orf104</i>    | -235                     | promoter     | NA                                          | -0.109                                         | <i>DBF4B</i>         | NA            | NA        | NA              | TRUE              |                     |                                             |
| <b>chr7:128708938</b>  | 1,25E-06 | 1,62E-02 | 0.236                  | <i>TP1P2</i>        | 13663                    | intergenic   | NA                                          | -0.281                                         | <i>ODCP</i>          | NA            | NA        | NA              | FALSE             |                     |                                             |
| <b>chr9:139427025</b>  | 1,36E-06 | 1,71E-02 | 0.173                  | <i>MIR4673</i>      | -12948                   | intron       | NA                                          | 0.33                                           | <i>RP11-611D20.2</i> | NA            | NA        | NA              | FALSE             | enhancer            | <i>SEC16A, NOTCH1</i>                       |
| chr17:80057621         | 1,39E-06 | 1,73E-02 | 0.179                  | <i>FASN</i>         | -1516                    | intergenic   | 0.053                                       | -0.332                                         | <i>ARHGDI1A</i>      | NA            | NA        | NA              | FALSE             |                     |                                             |
| chr4:123286282         | 1,54E-06 | 1,87E-02 | -0.123                 | <i>ADAD1</i>        | -13839                   | intergenic   | NA                                          | -0.037                                         | <i>KIAA1109</i>      | NA            | NA        | NA              | FALSE             |                     |                                             |
| chr7:2903150           | 1,63E-06 | 1,95E-02 | 0.191                  | <i>GNA12</i>        | -19192                   | intergenic   | 0.052                                       | -0.11                                          | <i>CARD11</i>        | NA            | NA        | NA              | FALSE             |                     |                                             |
| chr6:158631123         | 1,83E-06 | 2,06E-02 | -0.163                 | <i>GTF2H5</i>       | 41746                    | intergenic   | -0.04                                       | -0.219                                         | <i>SYNJ2</i>         | NA            | NA        | NA              | FALSE             |                     |                                             |
| chr5:178156736         | 1,91E-06 | 2,10E-02 | -0.131                 | <i>ZNF354A</i>      | 968                      | promoter     | 0.091                                       | -0.136                                         | <i>ZNF354B</i>       | NA            | NA        | NA              | FALSE             |                     |                                             |
| chr7:2903323           | 2,06E-06 | 2,20E-02 | 0.164                  | <i>GNA12</i>        | -19365                   | intergenic   | -0.28                                       | -0.28                                          | <i>GNA12</i>         | NA            | NA        | NA              | FALSE             |                     |                                             |

|                 |          |          |        |              |         |            |        |        |            |    |    |    |       |          |                  |
|-----------------|----------|----------|--------|--------------|---------|------------|--------|--------|------------|----|----|----|-------|----------|------------------|
| chr9:70937458   | 2,14E-06 | 2,24E-02 | -0.156 | FOXD4L3      | 19677   | intergenic | NA     | NA     | NA         | NA | NA | NA | FALSE |          |                  |
| chr19:56019597  | 2,18E-06 | 2,27E-02 | -0.576 | SSC5D        | 19729   | intron     | NA     | 0.233  | ZNF579     | NA | NA | NA | FALSE |          |                  |
| chr4:184602729  | 2,56E-06 | 2,56E-02 | 0.37   | TRAPP11      | -2273   | intron     | 0.092  | -0.403 | RWDD4      | NA | NA | NA | FALSE |          |                  |
| chr6:158631168  | 2,62E-06 | 2,58E-02 | -0.155 | GTF2H5       | 41791   | intergenic | -0.006 | -0.199 | SYNJ2      | NA | NA | NA | FALSE |          |                  |
| chr19:4058128   | 2,74E-06 | 2,66E-02 | 0.156  | ZBTB7A       | 7360    | intron     | -0.238 | -0.245 | DAPK3      | NA | NA | NA | FALSE | promoter | ZBTB7A           |
| chr8:11352019   | 3,07E-06 | 2,84E-02 | -0.117 | BLK          | 500     | promoter   | -0.429 | -0.429 | BLK        | NA | NA | NA | FALSE | promoter | FAM167A          |
| chr3:96495764   | 3,56E-06 | 3,13E-02 | -0.156 | EPHA6        | -37661  | intergenic | NA     | NA     | NA         | NA | NA | NA | FALSE |          |                  |
| chr2:2923622    | 3,74E-06 | 3,23E-02 | -0.152 | AKO95310     | 206177  | intron     | NA     | NA     | NA         | NA | NA | NA | FALSE |          |                  |
| chr13:19183653  | 3,91E-06 | 3,34E-02 | -0.179 | LINC00417    | 130587  | intergenic | NA     | NA     | NA         | NA | NA | NA | FALSE |          |                  |
| chr19:54677584  | 4,45E-06 | 3,67E-02 | 0.128  | TMC4         | -641    | promoter   | NA     | -0.231 | TSEN34     | NA | NA | NA | FALSE |          |                  |
| chr19:1466187   | 5,02E-06 | 3,94E-02 | 0.104  | C19orf25     | 13042   | exon       | 0.081  | 0.172  | REEP6      | NA | NA | NA | FALSE |          |                  |
| chr17:956622    | 5,07E-06 | 3,95E-02 | -0.171 | Metazoa_SRP  | 9015    | intron     | NA     | 0.103  | ABR        | NA | NA | NA | FALSE |          |                  |
| chr10:135092506 | 5,12E-06 | 3,96E-02 | 0.179  | ADAM8        | -2100   | exon       | -0.52  | -0.52  | ADAM8      | NA | NA | NA | FALSE |          |                  |
| chr2:27038329   | 5,35E-06 | 4,09E-02 | -0.184 | CENPA        | 29449   | intergenic | NA     | -0.077 | TMEM214    | NA | NA | NA | FALSE |          |                  |
| chr16:8960607   | 5,46E-06 | 4,16E-02 | -0.113 | CARHSP1      | 679     | promoter   | 0.047  | 0.287  | C16orf72   | NA | NA | NA | FALSE |          |                  |
| chr14:57019261  | 6,27E-06 | 4,44E-02 | -0.159 | TMEM260      | -27077  | intergenic | 0.072  | 0.072  | TMEM260    | NA | NA | NA | FALSE |          |                  |
| chr17:80272875  | 6,23E-06 | 4,44E-02 | 0.143  | CD7          | 2606    | exon       | -0.202 | -0.228 | FASN       | NA | NA | NA | FALSE |          |                  |
| chr14:101195081 | 6,54E-06 | 4,55E-02 | 0.136  | DLK1         | 1881    | intron     | NA     | NA     | NA         | NA | NA | NA | FALSE |          |                  |
| chr21:46654292  | 7,23E-06 | 4,88E-02 | -0.105 | C21orf89     | 27      | promoter   | NA     | -0.263 | POFUT2     | NA | NA | NA | FALSE |          |                  |
| chr21:10990482  | 7,39E-06 | 4,96E-02 | -0.156 | TPTE         | 439     | promoter   | NA     | NA     | NA         | NA | NA | NA | FALSE |          |                  |
| chr8:11813054   | 7,81E-06 | 5,16E-02 | 0.131  | DEFB136      | 19055   | intergenic | NA     | 0.404  | FAM85A     | NA | NA | NA | FALSE |          |                  |
| chr12:128827635 | 8,25E-06 | 5,35E-02 | -0.134 | MIR3612      | 49000   | intron     | NA     | NA     | NA         | NA | NA | NA | FALSE |          |                  |
| chr2:27038406   | 8,32E-06 | 5,38E-02 | -0.179 | CENPA        | 29526   | intergenic | NA     | -0.102 | TMEM214    | NA | NA | NA | FALSE |          |                  |
| chr19:37807788  | 8,56E-06 | 5,49E-02 | 0.169  | HKR1         | -1025   | intron     | -0.039 | 0.256  | ZNF569     | NA | NA | NA | FALSE |          |                  |
| chr3:196694243  | 9,15E-06 | 5,76E-02 | -0.173 | PIGZ         | 1462    | intron     | NA     | -0.247 | AC127904.2 | NA | NA | NA | FALSE |          |                  |
| chr14:65839593  | 9,59E-06 | 5,85E-02 | 0.113  | MIR4708      | -37693  | intergenic | NA     | -0.16  | FUT8       | NA | NA | NA | FALSE |          |                  |
| chr17:25979102  | 9,47E-06 | 5,85E-02 | -0.157 | DQ586005     | -15202  | intergenic | NA     | -0.167 | LGALS9     | NA | NA | NA | FALSE |          |                  |
| chr9:139426336  | 9,53E-06 | 5,85E-02 | 0.142  | MIR4673      | -12259  | intron     | NA     | 0.154  | SEC16A     | NA | NA | NA | FALSE | enhancer | SEC16A, NOTCH1   |
| chr18:40176497  | 9,80E-06 | 5,93E-02 | -0.136 | Mir_544      | -203586 | intron     | NA     | NA     | NA         | NA | NA | NA | FALSE |          |                  |
| chr2:27038408   | 9,96E-06 | 5,98E-02 | -0.176 | CENPA        | 29528   | intergenic | NA     | -0.074 | TMEM214    | NA | NA | NA | FALSE |          |                  |
| chr5:131822736  | 1,03E-05 | 6,07E-02 | 0.193  | IRF1         | 2440    | exon       | -0.318 | -0.325 | AC116366.6 | NA | NA | NA | FALSE |          |                  |
| chr3:118892467  | 1,04E-05 | 6,08E-02 | 0.196  | UPK1B        | 44      | promoter   | NA     | 0.125  | B4GALT4    | NA | NA | NA | FALSE |          |                  |
| chr4:39569133   | 1,10E-05 | 6,28E-02 | -0.429 | SMIM14       | 16446   | intron     | NA     | 0.188  | UBE2K      | NA | NA | NA | FALSE |          |                  |
| chr5:83928      | 1,12E-05 | 6,29E-02 | 0.317  | PLEKHG4B     | -56445  | intergenic | NA     | -0.175 | SDHA       | NA | NA | NA | FALSE |          |                  |
| chr4:184602661  | 1,12E-05 | 6,31E-02 | 0.371  | TRAPP11      | -2341   | intron     | 0.104  | -0.386 | RWDD4      | NA | NA | NA | FALSE |          |                  |
| chr10:135092554 | 1,15E-05 | 6,41E-02 | 0.137  | ADAM8        | -2148   | exon       | -0.425 | -0.425 | ADAM8      | NA | NA | NA | FALSE |          |                  |
| chr10:55458783  | 1,24E-05 | 6,67E-02 | 0.15   | MBL2         | -927324 | intergenic | NA     | NA     | NA         | NA | NA | NA | FALSE |          |                  |
| chr7:331219     | 1,25E-05 | 6,70E-02 | 0.106  | LOC100288524 | 1085    | exon       | NA     | -0.111 | PDGFA      | NA | NA | NA | FALSE |          |                  |
| chr20:44451904  | 1,31E-05 | 6,77E-02 | 0.15   | TNNC2        | 4050    | exon       | -0.383 | -0.383 | TNNC2      | NA | NA | NA | FALSE | enhancer | WFDC3, PLTP      |
| chr4:1522024    | 1,32E-05 | 6,77E-02 | 0.211  | AX748388     | 55943   | intergenic | NA     | -0.403 | SLBP       | NA | NA | NA | FALSE |          |                  |
| chr9:46355134   | 1,29E-05 | 6,77E-02 | -0.112 | Y_RNA        | -7471   | intergenic | NA     | NA     | NA         | NA | NA | NA | FALSE |          |                  |
| chr16:433927    | 1,33E-05 | 6,77E-02 | -0.226 | LOC100134368 | 1688    | intron     | NA     | -0.255 | TMEM8A     | NA | NA | NA | FALSE |          |                  |
| chr6:158636092  | 1,33E-05 | 6,77E-02 | -0.209 | GTF2H5       | 46715   | intergenic | -0.147 | -0.298 | SYNJ2      | NA | NA | NA | FALSE |          |                  |
| chr2:37382150   | 1,34E-05 | 6,78E-02 | 0.149  | EIF2AK2      | 2041    | intron     | -0.243 | -0.335 | PRKD3      | NA | NA | NA | FALSE | promoter | EIF2AK2, NDUFAF7 |
| chr18:74118259  | 1,43E-05 | 6,95E-02 | -0.156 | ZNF516       | -26001  | intron     | 0.101  | 0.101  | ZNF516     | NA | NA | NA | FALSE |          |                  |
| chr10:118885541 | 1,47E-05 | 7,07E-02 | -0.137 | KIAA1598     | 557     | promoter   | NA     | 0.178  | PDZD8      | NA | NA | NA | FALSE |          |                  |
| chr3:118892305  | 1,50E-05 | 7,15E-02 | 0.204  | UPK1B        | -120    | promoter   | NA     | 0.28   | B4GALT4    | NA | NA | NA | TRUE  |          |                  |
| chr15:27139216  | 1,53E-05 | 7,22E-02 | 0.146  | GABRA5       | 26945   | intron     | NA     | NA     | NA         | NA | NA | NA | FALSE |          |                  |
| chr16:3116120   | 1,54E-05 | 7,22E-02 | -0.137 | IL32         | 337     | promoter   | -0.154 | -0.297 | ZNF213-AS1 | NA | NA | NA | FALSE |          |                  |
| chr16:21200438  | 1,67E-05 | 7,58E-02 | 0.228  | ZP2          | 22630   | intergenic | NA     | 0.392  | NPIP3      | NA | NA | NA | FALSE |          |                  |
| chr1:145385344  | 1,70E-05 | 7,66E-02 | 0.119  | TRNA_Asn     | -385    | promoter   | NA     | -0.46  | PIAS3      | NA | NA | NA | FALSE |          |                  |
| chr2:113192585  | 1,70E-05 | 7,66E-02 | 0.177  | RGPD8        | -524    | promoter   | -0.193 | 0.213  | TTL        | NA | NA | NA | FALSE |          |                  |
| chr9:129262301  | 1,75E-05 | 7,74E-02 | 0.121  | Mir_1302     | 30948   | intron     | NA     | -0.133 | MVB12B     | NA | NA | NA | FALSE | enhancer | MVB12B           |
| chr7:52341721   | 1,85E-05 | 8,07E-02 | -0.156 | POM121L12    | -761628 | intergenic | NA     | NA     | NA         | NA | NA | NA | FALSE |          |                  |
| chr19:575524    | 1,92E-05 | 8,31E-02 | -0.132 | BSG          | 3072    | intron     | -0.223 | -0.223 | BSG        | NA | NA | NA | FALSE |          |                  |

|                 |          |          |        |                     |        |            |        |        |                   |    |    |    |       |          |                      |
|-----------------|----------|----------|--------|---------------------|--------|------------|--------|--------|-------------------|----|----|----|-------|----------|----------------------|
| chr10:134597567 | 1,94E-05 | 8,34E-02 | 0.142  | <i>NKX6-2</i>       | 1971   | intergenic | NA     | -0.009 | <i>INPP5A</i>     | NA | NA | NA | FALSE |          |                      |
| chr8:128891631  | 1,96E-05 | 8,42E-02 | -0.103 | <i>PVT1</i>         | -11204 | intron     | 0      | -0.151 | <i>MYC</i>        | NA | NA | NA | FALSE | enhancer | <i>MIR1204, PVT1</i> |
| chr2:113192563  | 2,18E-05 | 9,03E-02 | 0.108  | <i>RGPD8</i>        | -502   | promoter   | -0.145 | -0.145 | <i>RGPD8</i>      | NA | NA | NA | FALSE |          |                      |
| chr4:190906058  | 2,46E-05 | 9,67E-02 | -0.137 | <i>TUBB4Q</i>       | -31    | promoter   | NA     | 0.184  | <i>FRG1</i>       | NA | NA | NA | FALSE |          |                      |
| chr9:137675433  | 2,54E-05 | 9,78E-02 | -0.136 | <i>MIR3689C</i>     | 65783  | intron     | NA     | -0.052 | <i>FCN1</i>       | NA | NA | NA | FALSE |          |                      |
| chr17:5026771   | 2,61E-05 | 9,83E-02 | 0.134  | <i>ZNF232</i>       | -375   | promoter   | 0.245  | 0.296  | <i>RABEP1</i>     | NA | NA | NA | FALSE |          |                      |
| chr2:49448436   | 2,59E-05 | 9,83E-02 | 0.267  | <i>LOC100128946</i> | 185856 | intergenic | NA     | NA     | <i>NA</i>         | NA | NA | NA | FALSE |          |                      |
| chr4:56023764   | 2,67E-05 | 9,91E-02 | 0.152  | <i>KDR</i>          | -32003 | intergenic | NA     | -0.086 | <i>TMEM165</i>    | NA | NA | NA | FALSE |          |                      |
| chr7:154683942  | 2,70E-05 | 9,96E-02 | -0.124 | <i>LOC100132707</i> | -36285 | intron     | NA     | -0.151 | <i>PAXIP1-AS1</i> | NA | NA | NA | FALSE |          |                      |
| chr4:81128426   | 2,73E-05 | 9,97E-02 | -0.11  | <i>PRDM8</i>        | 9771   | intergenic | 0.152  | 0.152  | <i>PRDM8</i>      | NA | NA | NA | FALSE |          |                      |

Standalone differentially methylated CpGs, which are not part of differentially methylated regions, are marked with red color.

**ESM Table 5. Differentially methylated CpGs identified in the CD4<sup>+</sup>CD8<sup>+</sup> cell fraction between cases and controls in all longitudinal samples**

| Methylation difference |          |          |                        | Nearest gene |                          |              | Methylation-expression correlation analysis |                                                |                  | eQTM analysis |           |                 |                   | GeneHancer database |                                             |
|------------------------|----------|----------|------------------------|--------------|--------------------------|--------------|---------------------------------------------|------------------------------------------------|------------------|---------------|-----------|-----------------|-------------------|---------------------|---------------------------------------------|
| CpG site               | P value  | FDR      | Methylation difference | Nearest gene | Distance to nearest gene | Genomic part | Nearest gene correlation, Spearman rho      | The highest observed correlation, Spearman rho | Correlating gene | CpG name      | eQTM, FDR | Overall Z Score | CpG found on 450K | Genehancer          | Genes possibly regulated by standalone DMCs |
| chr18:54333583         | 1,26E-17 | 7,62E-12 | 0.131                  | WDR7         | 14969                    | intron       | 0.259                                       | 0.259                                          | WDR7             | NA            | NA        | NA              | FALSE             |                     |                                             |
| chr14:57523325         | 5,17E-13 | 1,25E-07 | -0.299                 | EXOC5        | 175766                   | intergenic   | -0.17                                       | -0.188                                         | AP5M1            | NA            | NA        | NA              | FALSE             |                     |                                             |
| chr3:194706028         | 1,24E-12 | 2,51E-07 | -0.132                 | XXYL1        | 136897                   | intergenic   | -0.036                                      | NA                                             | NA               | NA            | NA        | NA              | FALSE             |                     |                                             |
| chr5:173991159         | 7,59E-12 | 1,32E-06 | 0.143                  | MSX2         | -160416                  | intergenic   | NA                                          | NA                                             | NA               | NA            | NA        | NA              | FALSE             |                     |                                             |
| chr19:38346420         | 1,14E-11 | 1,72E-06 | 0.115                  | LOC100631378 | -585                     | promoter     | NA                                          | -0.19                                          | ZFP30            | NA            | NA        | NA              | FALSE             |                     |                                             |
| chr3:194705954         | 3,75E-11 | 5,06E-06 | -0.138                 | XXYL1        | 136971                   | intergenic   | -0.012                                      | NA                                             | NA               | NA            | NA        | NA              | TRUE              |                     |                                             |
| chr6:166419166         | 5,30E-11 | 6,44E-06 | 0.104                  | LINC00473    | -17640                   | intergenic   | NA                                          | NA                                             | NA               | NA            | NA        | NA              | FALSE             |                     |                                             |
| chr11:134709660        | 2,73E-10 | 2,55E-05 | 0.215                  | AK125040     | 103823                   | intergenic   | NA                                          | NA                                             | NA               | NA            | NA        | NA              | FALSE             |                     |                                             |
| chr1:161582872         | 7,83E-09 | 5,94E-04 | 0.12                   | TRNA_Glu     | 366                      | promoter     | NA                                          | -0.487                                         | FCGR2C           | NA            | NA        | NA              | FALSE             |                     |                                             |
| chr15:20374137         | 9,67E-09 | 6,90E-04 | -0.122                 | BC107108     | 11451                    | intergenic   | NA                                          | NA                                             | NA               | NA            | NA        | NA              | FALSE             |                     |                                             |
| chr4:1522045           | 3,83E-08 | 1,94E-03 | 0.182                  | AX748388     | 55922                    | intergenic   | NA                                          | 0.218                                          | TMEM129          | NA            | NA        | NA              | FALSE             |                     |                                             |
| chr22:49448575         | 4,97E-08 | 2,30E-03 | 0.199                  | LOC100128946 | 185995                   | intergenic   | NA                                          | NA                                             | NA               | NA            | NA        | NA              | FALSE             |                     |                                             |
| chr19:38346382         | 1,17E-07 | 3,73E-03 | 0.115                  | LOC100631378 | -547                     | promoter     | NA                                          | -0.188                                         | ZFP30            | NA            | NA        | NA              | FALSE             |                     |                                             |
| chr6:2940740           | 1,16E-07 | 3,73E-03 | -0.107                 | SERPIN6      | 17664                    | intergenic   | 0.148                                       | 0.33                                           | HTATSF1P2        | NA            | NA        | NA              | FALSE             |                     |                                             |
| chr19:46774424         | 1,28E-07 | 3,89E-03 | 0.149                  | HIF3A        | -25879                   | intron       | NA                                          | -0.14                                          | PP5C             | NA            | NA        | NA              | FALSE             | enhancer            | HIF3A                                       |
| chr2:113192477         | 1,45E-07 | 4,18E-03 | 0.129                  | RGPD8        | -416                     | promoter     | -0.041                                      | 0.114                                          | TTL              | NA            | NA        | NA              | FALSE             |                     |                                             |
| chr4:8890133           | 1,45E-07 | 4,18E-03 | 0.141                  | HMX1         | -16591                   | intergenic   | NA                                          | NA                                             | NA               | NA            | NA        | NA              | FALSE             |                     |                                             |
| chr14:96362128         | 2,13E-07 | 5,88E-03 | -0.181                 | LINC00617    | 19021                    | intron       | NA                                          | 0.059                                          | TCL1A            | NA            | NA        | NA              | FALSE             |                     |                                             |
| chr16:32289963         | 2,29E-07 | 6,19E-03 | -0.137                 | LOC390705    | 11340                    | intergenic   | NA                                          | NA                                             | NA               | NA            | NA        | NA              | FALSE             |                     |                                             |
| chr16:8960523          | 3,71E-07 | 8,34E-03 | -0.101                 | CARHSP1      | 763                      | promoter     | 0.026                                       | 0.277                                          | ABAT             | NA            | NA        | NA              | FALSE             |                     |                                             |
| chr3:193678373         | 3,63E-07 | 8,34E-03 | -0.152                 | DPPA2P3      | 33655                    | intron       | NA                                          | 0.156                                          | HES1             | NA            | NA        | NA              | FALSE             |                     |                                             |
| chr5:167285675         | 3,42E-07 | 8,34E-03 | -0.151                 | TENM2        | 103684                   | intron       | NA                                          | NA                                             | NA               | NA            | NA        | NA              | FALSE             |                     |                                             |
| chr7:64540916          | 3,69E-07 | 8,34E-03 | -0.148                 | BC044608     | 723                      | promoter     | NA                                          | 0.276                                          | ERV3-1           | NA            | NA        | NA              | FALSE             |                     |                                             |
| chr19:54677584         | 5,12E-07 | 1,04E-02 | 0.141                  | TMC4         | -641                     | promoter     | NA                                          | 0.342                                          | VSTM1            | NA            | NA        | NA              | FALSE             |                     |                                             |
| chr9:136075222         | 5,51E-07 | 1,08E-02 | 0.138                  | OBP2B        | 9407                     | intergenic   | NA                                          | 0.238                                          | REXO4            | NA            | NA        | NA              | FALSE             |                     |                                             |
| chr9:136075028         | 6,02E-07 | 1,11E-02 | 0.112                  | OBP2B        | 9601                     | intergenic   | NA                                          | 0.229                                          | SURF4            | NA            | NA        | NA              | FALSE             |                     |                                             |
| chr14:19888831         | 6,33E-07 | 1,13E-02 | -0.109                 | LINC00516    | -5538                    | intron       | NA                                          | NA                                             | NA               | NA            | NA        | NA              | FALSE             |                     |                                             |
| chr9:136063981         | 6,82E-07 | 1,18E-02 | -0.165                 | OBP2B        | 20648                    | intergenic   | NA                                          | -0.153                                         | RPL7A            | NA            | NA        | NA              | FALSE             |                     |                                             |
| chr9:136075435         | 7,58E-07 | 1,30E-02 | 0.127                  | OBP2B        | 9194                     | intergenic   | NA                                          | 0.215                                          | GBG71            | NA            | NA        | NA              | FALSE             |                     |                                             |
| chr1:2370993           | 7,83E-07 | 1,31E-02 | 0.106                  | PEX10        | -26984                   | intergenic   | 0.09                                        | 0.163                                          | PANK4            | NA            | NA        | NA              | FALSE             |                     |                                             |
| chr2:205393977         | 9,20E-07 | 1,49E-02 | -0.102                 | PARD3B       | -16539                   | intergenic   | NA                                          | NA                                             | NA               | NA            | NA        | NA              | FALSE             |                     |                                             |
| chr1:43425490          | 9,57E-07 | 1,53E-02 | 0.14                   | SLC2A1       | -644                     | promoter     | -0.148                                      | 0.195                                          | EBNA1BP2         | NA            | NA        | NA              | FALSE             |                     |                                             |
| chr5:177921624         | 1,06E-06 | 1,63E-02 | -0.356                 | COL23A1      | 95933                    | intron       | NA                                          | 0.227                                          | RN7SKP70         | NA            | NA        | NA              | FALSE             |                     |                                             |
| chr5:1004150           | 1,15E-06 | 1,74E-02 | 0.104                  | NKD2         | -4927                    | intergenic   | NA                                          | -0.068                                         | BRD9             | NA            | NA        | NA              | FALSE             |                     |                                             |
| chr10:71801791         | 1,30E-06 | 1,88E-02 | -0.131                 | H2AFY2       | -10566                   | intergenic   | NA                                          | -0.282                                         | TYSND1           | NA            | NA        | NA              | FALSE             |                     |                                             |
| chr9:136075476         | 1,41E-06 | 1,99E-02 | 0.142                  | OBP2B        | 9153                     | intergenic   | NA                                          | 0.274                                          | SURF1            | NA            | NA        | NA              | FALSE             |                     |                                             |
| chr4:961576            | 2,01E-06 | 2,65E-02 | 0.164                  | DGKQ         | 5773                     | exon         | 0.654                                       | 0.654                                          | DGKQ             | NA            | NA        | NA              | FALSE             |                     |                                             |
| chr11:187909           | 2,42E-06 | 2,99E-02 | 0.122                  | SCGB1C1      | -5171                    | intergenic   | NA                                          | 0.412                                          | RP11-326C3.2     | NA            | NA        | NA              | FALSE             |                     |                                             |
| chr19:35758166         | 2,57E-06 | 3,16E-02 | 0.108                  | USF2         | -1730                    | exon         | -0.04                                       | 0.207                                          | FXYD5            | NA            | NA        | NA              | FALSE             | promoter            | LSR                                         |
| chr19:19976235         | 2,71E-06 | 3,29E-02 | 0.138                  | ZNF253       | -479                     | promoter     | 0.056                                       | 0.244                                          | ATP13A1          | NA            | NA        | NA              | FALSE             |                     |                                             |
| chr2:107200953         | 3,13E-06 | 3,52E-02 | -0.205                 | RGPD3        | -116153                  | intergenic   | NA                                          | NA                                             | NA               | NA            | NA        | NA              | FALSE             |                     |                                             |
| chr16:58534501         | 3,33E-06 | 3,61E-02 | 0.13                   | NDRG4        | 456                      | promoter     | NA                                          | -0.311                                         | SETD6            | NA            | NA        | NA              | FALSE             | promoter            | NDRG4                                       |
| chr17:63267120         | 3,30E-06 | 3,61E-02 | -0.121                 | RGS9         | 82300                    | intergenic   | -0.316                                      | -0.316                                         | RGS9             | NA            | NA        | NA              | FALSE             |                     |                                             |
| chr19:519384           | 3,25E-06 | 3,61E-02 | -0.148                 | Mir_324      | 11504                    | exon         | NA                                          | 0.166                                          | BSG              | NA            | NA        | NA              | FALSE             |                     |                                             |
| chr7:155327253         | 3,59E-06 | 3,68E-02 | -0.103                 | CNPY1        | -715                     | promoter     | NA                                          | 0.129                                          | RBM33            | NA            | NA        | NA              | FALSE             |                     |                                             |
| chr7:100304538         | 4,05E-06 | 4,06E-02 | -0.131                 | POP7         | 86                       | promoter     | -0.044                                      | 0.138                                          | SLC12A9          | NA            | NA        | NA              | FALSE             |                     |                                             |
| chr13:106062717        | 4,11E-06 | 4,09E-02 | -0.153                 | DAOA         | -55499                   | intergenic   | NA                                          | NA                                             | NA               | NA            | NA        | NA              | FALSE             |                     |                                             |

|                 |          |          |        |                     |        |            |        |        |                      |            |             |           |       |
|-----------------|----------|----------|--------|---------------------|--------|------------|--------|--------|----------------------|------------|-------------|-----------|-------|
| chr1:151870743  | 4,39E-06 | 4,23E-02 | -0.106 | <i>THEM4</i>        | 11619  | intron     | -0.383 | -0.383 | <i>THEM4</i>         | NA         | NA          | NA        | FALSE |
| chr6:52172154   | 5,00E-06 | 4,67E-02 | 0.219  | <i>MCM3</i>         | -22476 | intergenic | -0.053 | 0.215  | <i>EFHC1</i>         | NA         | NA          | NA        | FALSE |
| chr18:8526512   | 5,45E-06 | 4,86E-02 | -0.106 | <i>Metazoa_SRP</i>  | 54685  | intergenic | NA     | 0.165  | <i>RAB12</i>         | NA         | NA          | NA        | FALSE |
| chr11:118842392 | 6,61E-06 | 5,40E-02 | 0.108  | <i>FOXR1</i>        | -25    | promoter   | NA     | -0.32  | <i>DDX6</i>          | NA         | NA          | NA        | TRUE  |
| chr6:52172175   | 6,63E-06 | 5,40E-02 | 0.187  | <i>MCM3</i>         | -22497 | intergenic | -0.041 | -0.041 | <i>MCM3</i>          | NA         | NA          | NA        | FALSE |
| chr4:8890312    | 7,54E-06 | 5,79E-02 | 0.153  | <i>HMX1</i>         | -16770 | intergenic | NA     | NA     | <i>NA</i>            | NA         | NA          | NA        | FALSE |
| chr10:79395281  | 7,82E-06 | 5,90E-02 | 0.122  | <i>KCNMA1</i>       | 2297   | intron     | NA     | NA     | <i>NA</i>            | NA         | NA          | NA        | FALSE |
| chr3:194706077  | 8,47E-06 | 6,23E-02 | -0.145 | <i>XXYL1</i>        | 136848 | intergenic | 0.046  | NA     | <i>NA</i>            | NA         | NA          | NA        | FALSE |
| chr17:72916077  | 8,85E-06 | 6,35E-02 | 0.152  | <i>USH1G</i>        | 3275   | exon       | NA     | 0.366  | <i>NT5C</i>          | NA         | NA          | NA        | FALSE |
| chr5:172110756  | 8,95E-06 | 6,39E-02 | -0.108 | <i>NEURL1B</i>      | 42482  | exon       | NA     | 0.245  | <i>DUSP1</i>         | NA         | NA          | NA        | FALSE |
| chr10:13341244  | 9,25E-06 | 6,53E-02 | 0.142  | <i>PHYH</i>         | 503    | promoter   | 0.176  | 0.176  | <i>PHYH</i>          | NA         | NA          | NA        | FALSE |
| chr13:106062745 | 1,01E-05 | 6,81E-02 | -0.141 | <i>DAOA</i>         | -55471 | intergenic | NA     | NA     | <i>NA</i>            | NA         | NA          | NA        | FALSE |
| chr3:194705950  | 1,03E-05 | 6,85E-02 | -0.133 | <i>XXYL1</i>        | 136975 | intergenic | 0.09   | NA     | <i>NA</i>            | NA         | NA          | NA        | FALSE |
| chr14:19888820  | 1,14E-05 | 7,07E-02 | -0.103 | <i>LINC00516</i>    | -5549  | intron     | NA     | NA     | <i>NA</i>            | NA         | NA          | NA        | FALSE |
| chr2:176121814  | 1,10E-05 | 7,07E-02 | -0.148 | <i>ATP5G3</i>       | -75325 | intergenic | 0.01   | 0.011  | <i>ATF2</i>          | NA         | NA          | NA        | FALSE |
| chr4:1522024    | 1,13E-05 | 7,07E-02 | 0.193  | <i>AX748388</i>     | 55943  | intergenic | NA     | 0.298  | <i>UVSSA</i>         | NA         | NA          | NA        | FALSE |
| chr4:186318341  | 1,13E-05 | 7,07E-02 | -0.18  | <i>ANKRD37</i>      | 503    | promoter   | 0.102  | -0.243 | <i>KIAA1430</i>      | NA         | NA          | NA        | FALSE |
| chr4:961649     | 1,11E-05 | 7,07E-02 | 0.128  | <i>DGKQ</i>         | 5700   | intron     | 0.44   | 0.44   | <i>DGKQ</i>          | NA         | NA          | NA        | FALSE |
| chr1:145385338  | 1,21E-05 | 7,33E-02 | 0.116  | <i>TRNA_Asn</i>     | -391   | promoter   | NA     | -0.297 | <i>RNVU1-6</i>       | NA         | NA          | NA        | FALSE |
| chr10:118885594 | 1,29E-05 | 7,33E-02 | -0.171 | <i>KIAA1598</i>     | 504    | promoter   | 0.14   | -0.198 | <i>SLC18A2</i>       | NA         | NA          | NA        | FALSE |
| chr10:1974873   | 1,24E-05 | 7,33E-02 | -0.15  | <i>LINC00700</i>    | 81670  | intergenic | NA     | NA     | <i>NA</i>            | NA         | NA          | NA        | FALSE |
| chr14:19889575  | 1,29E-05 | 7,33E-02 | -0.166 | <i>LINC00516</i>    | -4794  | intron     | NA     | NA     | <i>NA</i>            | NA         | NA          | NA        | FALSE |
| chr21:28215532  | 1,25E-05 | 7,33E-02 | -0.139 | <i>ADAMTS1</i>      | 2197   | intron     | NA     | NA     | <i>NA</i>            | NA         | NA          | NA        | FALSE |
| chr22:49447913  | 1,30E-05 | 7,33E-02 | 0.143  | <i>LOC100128946</i> | 185333 | intergenic | NA     | NA     | <i>NA</i>            | NA         | NA          | NA        | FALSE |
| chr19:519572    | 1,37E-05 | 7,64E-02 | -0.154 | <i>Mir_324</i>      | 11692  | exon       | NA     | 0.311  | <i>CDC34</i>         | NA         | NA          | NA        | FALSE |
| chr11:55640124  | 1,42E-05 | 7,75E-02 | -0.105 | <i>TRIM51</i>       | -10649 | intergenic | NA     | NA     | <i>NA</i>            | NA         | NA          | NA        | FALSE |
| chr9:70647363   | 1,47E-05 | 7,90E-02 | -0.219 | <i>AKO56618</i>     | 1312   | exon       | NA     | 0.251  | <i>CBWD5</i>         | NA         | NA          | NA        | FALSE |
| chr13:106062692 | 1,52E-05 | 7,97E-02 | -0.15  | <i>DAOA</i>         | -55524 | intergenic | NA     | NA     | <i>NA</i>            | NA         | NA          | NA        | FALSE |
| chr14:103227458 | 1,82E-05 | 8,61E-02 | -0.154 | <i>TRAF3</i>        | -16358 | intergenic | 0.101  | 0.104  | <i>RCOR1</i>         | NA         | NA          | NA        | FALSE |
| chr5:1004130    | 1,82E-05 | 8,61E-02 | 0.132  | <i>NKD2</i>         | -4947  | intergenic | NA     | 0.158  | <i>SLC12A7</i>       | NA         | NA          | NA        | FALSE |
| chr9:136075525  | 1,82E-05 | 8,61E-02 | 0.107  | <i>OBP2B</i>        | 9104   | intergenic | NA     | -0.198 | <i>SURF6</i>         | NA         | NA          | NA        | FALSE |
| chr20:61642387  | 2,02E-05 | 9,18E-02 | 0.12   | <i>LOC63930</i>     | 1654   | intron     | NA     | 0.333  | <i>COL9A3</i>        | NA         | NA          | NA        | FALSE |
| chr2:73496203   | 2,04E-05 | 9,26E-02 | -0.146 | <i>FBXO41</i>       | 646    | promoter   | -0.096 | -0.096 | <i>FBXO41</i>        | cg21918313 | 0.001179981 | -4.619156 | TRUE  |
| chr4:81119274   | 2,12E-05 | 9,47E-02 | -0.133 | <i>PRDM8</i>        | 619    | promoter   | 0.219  | 0.219  | <i>PRDM8</i>         | NA         | NA          | NA        | FALSE |
| chr6:2940599    | 2,24E-05 | 9,69E-02 | -0.152 | <i>SERPINB6</i>     | 17805  | intergenic | 0.11   | 0.226  | <i>SERPINB1</i>      | NA         | NA          | NA        | FALSE |
| chr9:136075242  | 2,26E-05 | 9,69E-02 | 0.108  | <i>OBP2B</i>        | 9387   | intergenic | NA     | -0.137 | <i>RALGDS</i>        | NA         | NA          | NA        | FALSE |
| chr14:19889577  | 2,39E-05 | 9,88E-02 | -0.198 | <i>LINC00516</i>    | -4792  | intron     | NA     | NA     | <i>NA</i>            | NA         | NA          | NA        | FALSE |
| chr4:961573     | 2,37E-05 | 9,88E-02 | 0.119  | <i>DGKQ</i>         | 5776   | exon       | 0.528  | 0.528  | <i>DGKQ</i>          | NA         | NA          | NA        | FALSE |
| chr2:73496148   | 2,44E-05 | 9,95E-02 | -0.146 | <i>FBXO41</i>       | 701    | promoter   | -0.136 | 0.342  | <i>SMYD5</i>         | NA         | NA          | NA        | FALSE |
| chr5:172110762  | 2,45E-05 | 9,95E-02 | -0.104 | <i>NEURL1B</i>      | 42488  | exon       | NA     | 0.256  | <i>RP11-779O18.1</i> | NA         | NA          | NA        | FALSE |

promoter PHYH

Standalone differentially methylated CpGs, which are not part of differentially methylated regions, are marked with red color.



**ESM Table 6. Differentially methylated regions identified in the CD4<sup>+</sup> T cell fraction between cases and controls in all longitudinal samples**

| Differentially methylated region |               |                            |                         |                         |                         |                     | Nearest gene        |                          |              | GeneHancer analysis |                                                  |
|----------------------------------|---------------|----------------------------|-------------------------|-------------------------|-------------------------|---------------------|---------------------|--------------------------|--------------|---------------------|--------------------------------------------------|
| DMR                              | Area size, bp | Number of significant CpGs | Number of positive CpGs | Number of negative CpGs | Best P value within DMR | Best FDR within FDR | Nearest gene        | Distance to nearest gene | Genomic part | GeneHancer database | Genes possibly regulated by enhancer or promoter |
| chr2:113192161-chr2:113192585    | 424           | 6                          | 6                       | 0                       | 8,45E-13                | 1,25E-07            | <i>RGPD8</i>        | -100                     | promoter     |                     |                                                  |
| chr7:22860953-chr7:22861119      | 166           | 13                         | 0                       | 13                      | 2,61E-12                | 1,93E-07            | <i>TOMM7</i>        | 1487                     | intron       | promoter            | <i>TOMM7</i>                                     |
| chr11:118842572-chr11:118842764  | 192           | 3                          | 3                       | 0                       | 1,25E-10                | 3,71E-06            | <i>FOXR1</i>        | 349                      | promoter     |                     |                                                  |
| chr14:103227394-chr14:103227458  | 64            | 2                          | 0                       | 2                       | 5,86E-10                | 1,24E-05            | <i>TRAF3</i>        | -16422                   | intergenic   |                     |                                                  |
| chr6:121069653-chr6:121069703    | 50            | 4                          | 0                       | 4                       | 6,88E-10                | 1,34E-05            | <i>C6orf170</i>     | 488506                   | intergenic   |                     |                                                  |
| chr9:137673743-chr9:137674085    | 342           | 15                         | 0                       | 15                      | 7,25E-10                | 1,34E-05            | <i>MIR3689C</i>     | 67367                    | intron       |                     |                                                  |
| chr19:18118304-chr19:18118337    | 33            | 2                          | 0                       | 2                       | 1,11E-09                | 1,94E-05            | <i>ARRDC2</i>       | -673                     | promoter     |                     |                                                  |
| chr22:39633525-chr22:39633541    | 16            | 2                          | 2                       | 0                       | 1,77E-09                | 2,61E-05            | <i>PDGFB</i>        | 3390                     | intron       | promoter            | <i>SYNGR1, PDGFB</i>                             |
| chr20:47013292-chr20:47013415    | 123           | 8                          | 0                       | 8                       | 8,16E-09                | 7,79E-05            | <i>LINC00494</i>    | 18945                    | intergenic   |                     |                                                  |
| chr19:1336246-chr19:1336307      | 61            | 3                          | 3                       | 0                       | 1,94E-08                | 1,59E-04            | <i>MUM1</i>         | -18675                   | intergenic   |                     |                                                  |
| chr17:72916000-chr17:72916113    | 113           | 13                         | 13                      | 0                       | 3,45E-08                | 2,55E-04            | <i>USH1G</i>        | 3275                     | exon         |                     |                                                  |
| chr6:142623602-chr6:142623625    | 23            | 2                          | 0                       | 2                       | 6,26E-08                | 4,52E-04            | <i>GPR126</i>       | 571                      | promoter     |                     |                                                  |
| chr18:77397978-chr18:77398380    | 402           | 6                          | 6                       | 0                       | 2,46E-07                | 1,26E-03            | <i>CTDP1</i>        | -41442                   | intergenic   |                     |                                                  |
| chr9:46355235-chr9:46355291      | 56            | 2                          | 0                       | 2                       | 2,74E-07                | 1,34E-03            | <i>Y_RNA</i>        | -7370                    | intergenic   |                     |                                                  |
| chr2:27038313-chr2:27038448      | 135           | 8                          | 0                       | 8                       | 2,75E-07                | 1,34E-03            | <i>CENPA</i>        | 29449                    | intergenic   |                     |                                                  |
| chr21:45565981-chr21:45566008    | 27            | 3                          | 3                       | 0                       | 5,53E-07                | 2,34E-03            | <i>C21orf33</i>     | 12503                    | intergenic   | enhancer            | <i>TRAPPC10, PWP2</i>                            |
| chr7:154585741-chr7:154585853    | 112           | 3                          | 0                       | 3                       | 7,44E-07                | 2,82E-03            | <i>LOC100132707</i> | -134486                  | intron       |                     |                                                  |
| chr1:43814462-chr1:43814672      | 210           | 15                         | 0                       | 15                      | 7,64E-07                | 2,86E-03            | <i>CDC20</i>        | -9994                    | exon         |                     |                                                  |
| chr16:88453817-chr16:88453894    | 77            | 5                          | 5                       | 0                       | 7,87E-07                | 2,91E-03            | <i>ZNF469</i>       | -39985                   | intergenic   | enhancer            | <i>ZNF469</i>                                    |
| chr6:163570179-chr6:163570677    | 498           | 19                         | 0                       | 19                      | 1,15E-06                | 3,87E-03            | <i>AK296276</i>     | 42399                    | intron       |                     |                                                  |
| chr7:155832817-chr7:155832938    | 121           | 2                          | 0                       | 2                       | 1,18E-06                | 3,92E-03            | <i>Mir_598</i>      | -106144                  | intergenic   |                     |                                                  |
| chr21:46714693-chr21:46714810    | 117           | 6                          | 0                       | 6                       | 1,25E-06                | 4,07E-03            | <i>LOC642852</i>    | 6759                     | exon         | enhancer            | <i>LINC00205</i>                                 |
| chr16:2848427-chr16:2848681      | 254           | 11                         | 11                      | 0                       | 1,25E-06                | 4,07E-03            | <i>PRSS41</i>       | 111                      | promoter     |                     |                                                  |
| chr8:49309188-chr8:49309214      | 26            | 2                          | 2                       | 0                       | 2,44E-06                | 6,40E-03            | <i>EFCAB1</i>       | 338657                   | intergenic   | enhancer            | <i>LOC101929268</i>                              |
| chr7:64540896-chr7:64540960      | 64            | 3                          | 0                       | 3                       | 3,23E-06                | 7,30E-03            | <i>BC044608</i>     | 679                      | promoter     | enhancer            | <i>GTF2IP14</i>                                  |
| chr18:60278521-chr18:60278915    | 394           | 10                         | 10                      | 0                       | 3,46E-06                | 7,58E-03            | <i>DKFZp451A185</i> | 29700                    | intergenic   |                     |                                                  |
| chr21:47307634-chr21:47308422    | 788           | 13                         | 0                       | 13                      | 3,80E-06                | 7,98E-03            | <i>PCBP3</i>        | -8310                    | intron       | enhancer            | <i>PCBP3</i>                                     |
| chr19:48000357-chr19:48000450    | 93            | 3                          | 0                       | 3                       | 3,89E-06                | 7,99E-03            | <i>NAPA-AS1</i>     | 12820                    | intron       |                     |                                                  |
| chr4:186318341-chr4:186318348    | 7             | 2                          | 0                       | 2                       | 4,31E-06                | 8,41E-03            | <i>ANKRD37</i>      | 510                      | promoter     | promoter            | <i>LRP2BP, UFSP2, C4orf47</i>                    |
| chr4:81128344-chr4:81128539      | 195           | 5                          | 0                       | 5                       | 4,71E-06                | 8,92E-03            | <i>PRDM8</i>        | 9743                     | intergenic   |                     |                                                  |
| chr4:6107559-chr4:6107719        | 160           | 6                          | 0                       | 6                       | 5,62E-06                | 1,00E-02            | <i>JAKMIP1</i>      | 88637                    | intron       |                     |                                                  |
| chr1:228658815-chr1:228659210    | 395           | 8                          | 8                       | 0                       | 6,42E-06                | 1,06E-02            | <i>Histone3</i>     | -6925                    | intergenic   |                     |                                                  |
| chr11:75993457-chr11:75993521    | 64            | 2                          | 2                       | 0                       | 1,15E-05                | 1,48E-02            | <i>TRNA_Pro</i>     | -46518                   | intergenic   |                     |                                                  |
| chr12:9892250-chr12:9892305      | 55            | 2                          | 0                       | 2                       | 1,15E-05                | 1,48E-02            | <i>CLECL1</i>       | -6411                    | intergenic   | promoter            | <i>CLEC7A, CLECL1, KLRF1</i>                     |
| chr8:144808903-chr8:144809619    | 716           | 8                          | 8                       | 0                       | 1,24E-05                | 1,55E-02            | <i>FAM83H</i>       | 3452                     | exon         |                     |                                                  |
| chr5:131607372-chr5:131607629    | 257           | 16                         | 16                      | 0                       | 1,28E-05                | 1,58E-02            | <i>PDLIM4</i>       | 14262                    | intron       |                     |                                                  |
| chr19:46915417-chr19:46915595    | 178           | 14                         | 14                      | 0                       | 1,55E-05                | 1,74E-02            | <i>CCDC8</i>        | 1369                     | exon         | promoter            | <i>CCDC8</i>                                     |
| chr19:58571181-chr19:58571388    | 207           | 4                          | 4                       | 0                       | 1,75E-05                | 1,83E-02            | <i>ZNF135</i>       | 576                      | promoter     | promoter            | <i>ZNF135</i>                                    |
| chr3:96495764-chr3:96495854      | 90            | 6                          | 0                       | 6                       | 1,86E-05                | 1,87E-02            | <i>EPHA6</i>        | -37653                   | intergenic   |                     |                                                  |
| chr10:79395265-chr10:79395468    | 203           | 2                          | 2                       | 0                       | 1,90E-05                | 1,88E-02            | <i>KCNMA1</i>       | 2313                     | intron       |                     |                                                  |
| chr11:67351944-chr11:67351952    | 8             | 2                          | 0                       | 2                       | 1,97E-05                | 1,90E-02            | <i>GSTP1</i>        | 880                      | promoter     | promoter            | <i>NDUFV1, NUDT8, ENSG00000255119</i>            |
| chr4:961400-chr4:962384          | 984           | 27                         | 27                      | 0                       | 2,45E-05                | 2,18E-02            | <i>DGKQ</i>         | 5944                     | exon         |                     |                                                  |
| chr3:118892305-chr3:118892496    | 191           | 3                          | 3                       | 0                       | 2,85E-05                | 2,47E-02            | <i>UPK1B</i>        | -120                     | promoter     |                     |                                                  |

|                                 |      |    |    |   |            |          |                     |         |            |          |                                                         |
|---------------------------------|------|----|----|---|------------|----------|---------------------|---------|------------|----------|---------------------------------------------------------|
| chr22:31032485-chr22:31032517   | 32   | 2  | 2  | 0 | 2,98E-05   | 2,53E-02 | <i>SLC35E4</i>      | 694     | promoter   | promoter | <i>SLC35E4</i>                                          |
| chr3:196694100-chr3:196694374   | 274  | 8  | 0  | 8 | 2,99E-05   | 2,53E-02 | <i>PIGZ</i>         | 1341    | intron     |          |                                                         |
| chr8:60032900-chr8:60032942     | 42   | 2  | 2  | 0 | 3,20E-05   | 2,63E-02 | <i>TOX</i>          | -1176   | intergenic | promoter | <i>TOX</i>                                              |
| chr14:19888706-chr14:19889020   | 314  | 2  | 0  | 2 | 3,37E-05   | 2,68E-02 | <i>LINC00516</i>    | -5663   | intron     |          |                                                         |
| chr19:37807567-chr19:37807945   | 378  | 19 | 19 | 0 | 3,74E-05   | 2,79E-02 | <i>HKR1</i>         | -907    | promoter   | promoter | <i>ZNF527, ZNF793, LINC01535, HKR1, ENSG00000267682</i> |
| chr20:62570508-chr20:62570635   | 127  | 8  | 8  | 0 | 4,02E-05   | 2,92E-02 | <i>MIR1914</i>      | 2344    | intergenic | enhancer | <i>UCKL1</i>                                            |
| chr4:132897000-chr4:132897079   | 79   | 2  | 0  | 2 | 4,15E-05   | 3,00E-02 | <i>BC131768</i>     | 247749  | intergenic |          |                                                         |
| chr6:8436218-chr6:8436273       | 55   | 3  | 3  | 0 | 4,79E-05   | 3,30E-02 | <i>LOC100506207</i> | 409     | promoter   | promoter | <i>SLC35B3</i>                                          |
| chr15:98195837-chr15:98195904   | 67   | 6  | 6  | 0 | 5,62E-05   | 3,68E-02 | <i>BC024169</i>     | -114410 | intergenic |          |                                                         |
| chr22:26323697-chr22:26323710   | 13   | 3  | 0  | 3 | 5,99E-05   | 3,79E-02 | <i>MYO18B</i>       | -27435  | intron     |          |                                                         |
| chr17:135245-chr17:135302       | 57   | 4  | 4  | 0 | 6,17E-05   | 3,85E-02 | <i>RPH3AL</i>       | 42126   | intron     |          |                                                         |
| chr12:92029135-chr12:92029279   | 144  | 5  | 0  | 5 | 6,33E-05   | 3,91E-02 | <i>DCN</i>          | -452362 | intergenic |          |                                                         |
| chr4:160303481-chr4:160303611   | 130  | 8  | 8  | 0 | 7,08E-05   | 4,17E-02 | <i>RAPGEF2</i>      | 114485  | intergenic |          |                                                         |
| chr14:101194894-chr14:101195081 | 187  | 5  | 5  | 0 | 7,23E-05   | 4,18E-02 | <i>DLK1</i>         | 1694    | intron     | promoter | <i>DLK1</i>                                             |
| chr22:49447601-chr22:49448575   | 974  | 22 | 22 | 0 | 7,62E-05   | 4,30E-02 | <i>LOC100128946</i> | 185265  | intergenic |          |                                                         |
| chr8:42052604-chr8:42052870     | 266  | 7  | 0  | 7 | 8,74E-05   | 4,71E-02 | <i>PLAT</i>         | -2081   | intron     |          |                                                         |
| chr1:178456064-chr1:178456108   | 44   | 4  | 4  | 0 | 8,93E-05   | 4,76E-02 | <i>TEX35</i>        | -26134  | intergenic |          |                                                         |
| chr21:46677404-chr21:46677632   | 228  | 9  | 9  | 0 | 9,13E-05   | 4,79E-02 | <i>POFUT2</i>       | 19846   | intron     |          |                                                         |
| chr12:32626634-chr12:32626743   | 109  | 3  | 0  | 3 | 9,79E-05   | 4,94E-02 | <i>FGD4</i>         | -12272  | intergenic |          |                                                         |
| chr16:89150862-chr16:89151029   | 167  | 3  | 0  | 3 | 9,85E-05   | 4,94E-02 | <i>ACSF3</i>        | -9355   | intergenic |          |                                                         |
| chr13:20711574-chr13:20711584   | 10   | 2  | 2  | 0 | 0,00010818 | 5,18E-02 | <i>GJA3</i>         | 5854    | intergenic |          |                                                         |
| chr16:89050538-chr16:89050592   | 54   | 5  | 5  | 0 | 0,00011464 | 5,34E-02 | <i>CBFA2T3</i>      | -7043   | intergenic | enhancer | <i>CBFA2T3</i>                                          |
| chr16:32289963-chr16:32290350   | 387  | 3  | 0  | 3 | 0,0001208  | 5,46E-02 | <i>LOC390705</i>    | 11238   | intergenic |          |                                                         |
| chr12:133414368-chr12:133414497 | 129  | 9  | 9  | 0 | 0,00012569 | 5,56E-02 | <i>GOLGA3</i>       | -9001   | intergenic | enhancer | <i>CHFR</i>                                             |
| chr7:76129266-chr7:76129434     | 168  | 8  | 0  | 8 | 0,00012915 | 5,64E-02 | <i>DTX2</i>         | 156     | promoter   |          |                                                         |
| chr9:136075242-chr9:136075539   | 297  | 8  | 8  | 0 | 0,00014671 | 6,01E-02 | <i>OBP2B</i>        | 9194    | intergenic |          |                                                         |
| chr4:8890133-chr4:8891755       | 1622 | 3  | 3  | 0 | 0,00018867 | 7,06E-02 | <i>HMX1</i>         | -16591  | intergenic |          |                                                         |
| chr22:49442398-chr22:49442415   | 17   | 2  | 0  | 2 | 0,00020347 | 7,40E-02 | <i>LOC100128946</i> | 179835  | intergenic |          |                                                         |
| chr19:1466099-chr19:1466162     | 63   | 8  | 8  | 0 | 0,00021329 | 7,59E-02 | <i>C19orf25</i>     | 13130   | exon       | enhancer | <i>C19orf25</i>                                         |
| chr5:3605658-chr5:3606057       | 399  | 3  | 3  | 0 | 0,00021449 | 7,61E-02 | <i>IRX1</i>         | 9561    | intergenic |          |                                                         |
| chr1:149287263-chr1:149287303   | 40   | 2  | 0  | 2 | 0,00022958 | 7,91E-02 | <i>BC023516</i>     | -188    | promoter   |          |                                                         |
| chr3:194705981-chr3:194706091   | 110  | 2  | 0  | 2 | 0,0002553  | 8,33E-02 | <i>XXYL1</i>        | 136834  | intergenic |          |                                                         |
| chr7:158111329-chr7:158111331   | 2    | 2  | 2  | 0 | 0,00025746 | 8,36E-02 | <i>MIR595</i>       | 214177  | intron     |          |                                                         |
| chr22:17198946-chr22:17199120   | 174  | 8  | 0  | 8 | 0,00027805 | 8,69E-02 | <i>BC038197</i>     | 30355   | intergenic |          |                                                         |
| chr22:44529983-chr22:44530101   | 118  | 5  | 5  | 0 | 0,00029345 | 8,95E-02 | <i>TRNA_SeC</i>     | -16509  | intron     |          |                                                         |
| chr8:144787916-chr8:144788674   | 758  | 9  | 9  | 0 | 0,00033152 | 9,52E-02 | <i>CCDC166</i>      | 1638    | intron     |          |                                                         |

**ESM Table 7. Differentially methylated regions identified in the CD8<sup>+</sup> T cell fraction between cases and controls in all longitudinal samples**

| Differentially methylated region |               |                            |                         |                         |                         |                     | Nearest gene        |                          |              | GeneHancer analysis |                                                         |
|----------------------------------|---------------|----------------------------|-------------------------|-------------------------|-------------------------|---------------------|---------------------|--------------------------|--------------|---------------------|---------------------------------------------------------|
| DMR                              | Area size, bp | Number of significant CpGs | Number of positive CpGs | Number of negative CpGs | Best P value within DMR | Best FDR within FDR | Nearest gene        | Distance to nearest gene | Genomic part | GeneHancer database | Genes possibly regulated by enhancer or promoter        |
| chr16:32289928-chr16:32290543    | 615           | 12                         | 0                       | 12                      | 5,21E-11                | 1,27E-05            | <i>LOC390705</i>    | 11375                    | intergenic   |                     |                                                         |
| chr2:27038313-chr2:27038482      | 169           | 11                         | 1                       | 10                      | 2,78E-10                | 4,31E-05            | <i>CENPA</i>        | 29459                    | intergenic   |                     |                                                         |
| chr14:45343058-chr14:45343116    | 58            | 2                          | 0                       | 2                       | 8,55E-10                | 9,11E-05            | <i>C14orf28</i>     | -23449                   | intergenic   |                     |                                                         |
| chr16:433855-chr16:434103        | 248           | 4                          | 0                       | 4                       | 1,14E-09                | 1,08E-04            | <i>LOC100134368</i> | 1688                     | intron       | Promoter            | <i>TMEM8A, MRPL28</i>                                   |
| chr22:39633525-chr22:39633541    | 16            | 2                          | 2                       | 0                       | 1,14E-09                | 1,08E-04            | <i>PDGFB</i>        | 3390                     | intron       | Promoter            | <i>CBX7, SYNGR1, PDGFB</i>                              |
| chr7:3169658-chr7:3169674        | 16            | 2                          | 2                       | 0                       | 3,27E-09                | 2,65E-04            | <i>BCO38729</i>     | 44630                    | intergenic   |                     |                                                         |
| chr16:58534501-chr16:58534640    | 139           | 2                          | 2                       | 0                       | 6,77E-09                | 4,44E-04            | <i>NDRG4</i>        | 456                      | promoter     | Promoter            | <i>NDRG4</i>                                            |
| chr1:145385266-chr1:145385422    | 156           | 15                         | 14                      | 1                       | 1,02E-08                | 5,82E-04            | <i>TRNA_Asn</i>     | -430                     | promoter     |                     |                                                         |
| chr16:8960454-chr16:8960833      | 379           | 10                         | 0                       | 10                      | 1,59E-08                | 8,76E-04            | <i>CARHSP1</i>      | 772                      | promoter     | Promoter            | <i>PMM2, CARHSP1, ENSG00000260276</i>                   |
| chr14:101194267-chr14:101195081  | 814           | 7                          | 7                       | 0                       | 1,69E-08                | 8,85E-04            | <i>DLK1</i>         | 1694                     | intron       | Promoter            | <i>DLK1</i>                                             |
| chr3:196693993-chr3:196694364    | 371           | 18                         | 0                       | 18                      | 1,81E-08                | 8,85E-04            | <i>PIGZ</i>         | 1341                     | intron       |                     |                                                         |
| chr8:144788607-chr8:144788806    | 199           | 7                          | 7                       | 0                       | 3,95E-08                | 1,38E-03            | <i>CCDC166</i>      | 1638                     | intron       |                     |                                                         |
| chr12:116978050-chr12:116978111  | 61            | 2                          | 0                       | 2                       | 1,43E-07                | 3,47E-03            | <i>LINC00173</i>    | 6812                     | intergenic   | Enhancer            | <i>MED13L, LINC00173</i>                                |
| chr16:3116115-chr16:3116616      | 501           | 11                         | 0                       | 11                      | 1,68E-07                | 3,82E-03            | <i>IL32</i>         | 580                      | promoter     | Promoter            | <i>IL32</i>                                             |
| chr5:3605658-chr5:3605727        | 69            | 4                          | 4                       | 0                       | 2,16E-07                | 4,67E-03            | <i>IRX1</i>         | 9546                     | intergenic   |                     |                                                         |
| chr18:844055-chr18:844167        | 112           | 2                          | 0                       | 2                       | 3,13E-07                | 6,14E-03            | <i>YES1</i>         | -31626                   | intergenic   |                     |                                                         |
| chr7:2060040-chr7:2060130        | 90            | 2                          | 2                       | 0                       | 4,39E-07                | 7,92E-03            | <i>MAD1L1</i>       | -79856                   | intron       |                     |                                                         |
| chr10:1416791-chr10:1416983      | 192           | 17                         | 0                       | 17                      | 6,03E-07                | 1,00E-02            | <i>ADARB2-AS1</i>   | -151997                  | intron       |                     |                                                         |
| chr6:158630758-chr6:158631170    | 412           | 12                         | 0                       | 12                      | 6,72E-07                | 1,06E-02            | <i>GTF2H5</i>       | 41392                    | intergenic   |                     |                                                         |
| chr20:2690382-chr20:2690396      | 14            | 2                          | 0                       | 2                       | 8,53E-07                | 1,26E-02            | <i>EBF4</i>         | 16860                    | intron       |                     |                                                         |
| chr22:49447601-chr22:49448575    | 974           | 26                         | 26                      | 0                       | 8,76E-07                | 1,28E-02            | <i>LOC100128946</i> | 185265                   | intergenic   |                     |                                                         |
| chr10:118885541-chr10:118885760  | 219           | 11                         | 0                       | 11                      | 9,29E-07                | 1,34E-02            | <i>KIAA1598</i>     | 459                      | promoter     |                     |                                                         |
| chr11:118842603-chr11:118842764  | 161           | 2                          | 2                       | 0                       | 9,67E-07                | 1,37E-02            | <i>FOXR1</i>        | 349                      | promoter     |                     |                                                         |
| chr2:113192114-chr2:113192585    | 471           | 9                          | 9                       | 0                       | 1,08E-06                | 1,50E-02            | <i>RGPD8</i>        | -524                     | promoter     |                     |                                                         |
| chr17:80057499-chr17:80057639    | 140           | 6                          | 6                       | 0                       | 1,39E-06                | 1,73E-02            | <i>FASN</i>         | -1526                    | intergenic   | Promoter            | <i>HGS, DCXR, GPS1, FOXK2, HEXDC, CCDC57, FASN</i>      |
| chr4:123286278-chr4:123286282    | 4             | 2                          | 0                       | 2                       | 1,54E-06                | 1,87E-02            | <i>ADAD1</i>        | -13843                   | intergenic   |                     |                                                         |
| chr7:2903150-chr7:2903323        | 173           | 4                          | 4                       | 0                       | 1,63E-06                | 1,95E-02            | <i>GNA12</i>        | -19192                   | intergenic   | Enhancer            | <i>GNA12</i>                                            |
| chr5:178156527-chr5:178156747    | 220           | 7                          | 0                       | 7                       | 1,91E-06                | 2,10E-02            | <i>ZNF354A</i>      | 1052                     | intron       | Promoter            | <i>ZNF354A</i>                                          |
| chr9:70937429-chr9:70937516      | 87            | 4                          | 0                       | 4                       | 2,14E-06                | 2,24E-02            | <i>FOXD4L3</i>      | 19677                    | intergenic   |                     |                                                         |
| chr4:184602661-chr4:184602729    | 68            | 2                          | 2                       | 0                       | 2,56E-06                | 2,56E-02            | <i>TRAPPC11</i>     | -2341                    | intron       |                     |                                                         |
| chr3:96495758-chr3:96495824      | 66            | 6                          | 0                       | 6                       | 3,56E-06                | 3,13E-02            | <i>EPHA6</i>        | -37661                   | intergenic   |                     |                                                         |
| chr2:2923575-chr2:2923622        | 47            | 2                          | 0                       | 2                       | 3,74E-06                | 3,23E-02            | <i>AK095310</i>     | 206177                   | intron       |                     |                                                         |
| chr13:19183634-chr13:19183707    | 73            | 12                         | 0                       | 12                      | 3,91E-06                | 3,34E-02            | <i>LINC00417</i>    | 130533                   | intergenic   |                     |                                                         |
| chr19:1466022-chr19:1466187      | 165           | 5                          | 5                       | 0                       | 5,02E-06                | 3,94E-02            | <i>C19orf25</i>     | 13112                    | exon         | Enhancer            | <i>C19orf25</i>                                         |
| chr10:135092506-chr10:135092612  | 106           | 5                          | 5                       | 0                       | 5,12E-06                | 3,96E-02            | <i>ADAM8</i>        | -2100                    | exon         | Promoter            | <i>TUBGCP2, ADAM8</i>                                   |
| chr17:80272367-chr17:80272875    | 508           | 2                          | 2                       | 0                       | 6,23E-06                | 4,44E-02            | <i>CD7</i>          | 2606                     | exon         |                     |                                                         |
| chr21:10989990-chr21:10990928    | 938           | 4                          | 0                       | 4                       | 7,39E-06                | 4,96E-02            | <i>TPTE</i>         | 439                      | promoter     |                     |                                                         |
| chr8:11812867-chr8:11813054      | 187           | 2                          | 2                       | 0                       | 7,81E-06                | 5,16E-02            | <i>DEFB136</i>      | 19242                    | intergenic   |                     |                                                         |
| chr19:37807633-chr19:37807945    | 312           | 20                         | 20                      | 0                       | 8,56E-06                | 5,49E-02            | <i>HKR1</i>         | -993                     | promoter     | promoter            | <i>ZNF527, LINC01535, ZNF793, HKR1, ENSG00000267682</i> |
| chr18:40176479-chr18:40176497    | 18            | 3                          | 0                       | 3                       | 9,80E-06                | 5,93E-02            | <i>Mir_544</i>      | -203586                  | intron       |                     |                                                         |
| chr5:131822690-chr5:131822736    | 46            | 2                          | 2                       | 0                       | 1,03E-05                | 6,07E-02            | <i>IRF1</i>         | 2440                     | exon         | promoter            | <i>RAD50, IRF1, AFF4, LOC105379175</i>                  |
| chr3:118892305-chr3:118892482    | 177           | 8                          | 8                       | 0                       | 1,04E-05                | 6,08E-02            | <i>UPK1B</i>        | -120                     | promoter     |                     |                                                         |
| chr7:331214-chr7:331219          | 5             | 2                          | 2                       | 0                       | 1,25E-05                | 6,70E-02            | <i>LOC100288524</i> | 1080                     | exon         |                     |                                                         |
| chr4:1521984-chr4:1522395        | 411           | 21                         | 21                      | 0                       | 1,32E-05                | 6,77E-02            | <i>AX748388</i>     | 55928                    | intergenic   |                     |                                                         |
| chr6:158636025-chr6:158636092    | 67            | 2                          | 0                       | 2                       | 1,33E-05                | 6,77E-02            | <i>GTF2H5</i>       | 46715                    | intergenic   |                     |                                                         |

|                               |      |    |    |    |          |          |                     |         |            |          |                          |
|-------------------------------|------|----|----|----|----------|----------|---------------------|---------|------------|----------|--------------------------|
| chr18:74118107-chr18:74118303 | 196  | 8  | 0  | 8  | 1,43E-05 | 6,95E-02 | <i>ZNF516</i>       | -25939  | intron     |          |                          |
| chr15:27139216-chr15:27139242 | 26   | 2  | 2  | 0  | 1,53E-05 | 7,22E-02 | <i>GABRA5</i>       | 26945   | intron     |          |                          |
| chr16:21200414-chr16:21200547 | 133  | 10 | 10 | 0  | 1,67E-05 | 7,58E-02 | <i>ZP2</i>          | 22630   | intergenic | Enhancer | <i>TMEM159</i>           |
| chr7:52341601-chr7:52341729   | 128  | 11 | 0  | 11 | 1,85E-05 | 8,07E-02 | <i>POM121L12</i>    | -761748 | intergenic |          |                          |
| chr19:575488-chr19:575524     | 36   | 2  | 0  | 2  | 1,92E-05 | 8,31E-02 | <i>BSG</i>          | 3072    | intron     | Promoter | <i>LOC105372233, BSG</i> |
| chr4:190906006-chr4:190906084 | 78   | 4  | 0  | 4  | 2,46E-05 | 9,67E-02 | <i>TUBB4Q</i>       | -31     | promoter   |          |                          |
| chr9:137673743-chr9:137675473 | 1730 | 23 | 0  | 23 | 2,54E-05 | 9,78E-02 | <i>MIR3689C</i>     | 67218   | intron     |          |                          |
| chr17:5026743-chr17:5026771   | 28   | 2  | 2  | 0  | 2,61E-05 | 9,83E-02 | <i>ZNF232</i>       | -375    | promoter   |          |                          |
| chr4:56023608-chr4:56023764   | 156  | 4  | 4  | 0  | 2,67E-05 | 9,91E-02 | <i>KDR</i>          | -31990  | intergenic |          |                          |
| chr7:154683942-chr7:154684327 | 385  | 2  | 0  | 2  | 2,70E-05 | 9,96E-02 | <i>LOC100132707</i> | -35900  | exon       |          |                          |
| chr4:81128364-chr4:81128544   | 180  | 6  | 0  | 6  | 2,73E-05 | 9,97E-02 | <i>PRDM8</i>        | 9884    | intergenic |          |                          |

**ESM Table 8. Differentially methylated regions identified in the CD4<sup>+</sup>CD8<sup>+</sup> cell fraction between cases and controls in all longitudinal samples**

| Differentially methylated region |               |                            |                         |                         |                         |                     | Nearest gene        |                          |              | GeneHancer analysis |                                                  |
|----------------------------------|---------------|----------------------------|-------------------------|-------------------------|-------------------------|---------------------|---------------------|--------------------------|--------------|---------------------|--------------------------------------------------|
| DMR                              | Area size, bp | Number of significant CpGs | Number of positive CpGs | Number of negative CpGs | Best P value within DMR | Best FDR within FDR | Nearest gene        | Distance to nearest gene | Genomic part | GeneHancer database | Genes possibly regulated by enhancer or promoter |
| chr3:194705950-chr3:194706097    | 147           | 9                          | 0                       | 9                       | 1,24E-12                | 2,51E-07            | <i>XXYL1</i>        | 136848                   | intergenic   |                     |                                                  |
| chr19:38346382-chr19:38346420    | 38            | 2                          | 2                       | 0                       | 1,14E-11                | 1,72E-06            | <i>LOC100631378</i> | -547                     | promoter     |                     |                                                  |
| chr6:166419049-chr6:166419166    | 117           | 3                          | 3                       | 0                       | 5,30E-11                | 6,44E-06            | <i>LINC00473</i>    | -17530                   | intergenic   |                     |                                                  |
| chr4:1521934-chr4:1522045        | 111           | 7                          | 7                       | 0                       | 3,83E-08                | 1,94E-03            | <i>AX748388</i>     | 55943                    | intergenic   |                     |                                                  |
| chr22:49447601-chr22:49448582    | 981           | 20                         | 20                      | 0                       | 4,97E-08                | 2,30E-03            | <i>LOC100128946</i> | 185265                   | intergenic   |                     |                                                  |
| chr6:2940599-chr6:2940746        | 147           | 8                          | 0                       | 8                       | 1,16E-07                | 3,73E-03            | <i>SERPINB6</i>     | 17805                    | intergenic   | enhancer            | <i>SERPINB9, SERPINB6</i>                        |
| chr4:8890133-chr4:8891755        | 1622          | 5                          | 5                       | 0                       | 1,45E-07                | 4,18E-03            | <i>HMX1</i>         | -16770                   | intergenic   |                     |                                                  |
| chr2:113192477-chr2:113192585    | 108           | 2                          | 2                       | 0                       | 1,45E-07                | 4,18E-03            | <i>RGPD8</i>        | -416                     | promoter     |                     |                                                  |
| chr14:96362128-chr14:96362157    | 29            | 2                          | 0                       | 2                       | 2,13E-07                | 5,88E-03            | <i>LINC00617</i>    | 19021                    | intron       |                     |                                                  |
| chr16:32289963-chr16:32290281    | 318           | 8                          | 0                       | 8                       | 2,29E-07                | 6,19E-03            | <i>LOC390705</i>    | 11107                    | intergenic   |                     |                                                  |
| chr5:167285661-chr5:167285753    | 92            | 14                         | 0                       | 14                      | 3,42E-07                | 8,34E-03            | <i>TENM2</i>        | 103679                   | intron       |                     |                                                  |
| chr3:193678336-chr3:193678373    | 37            | 2                          | 0                       | 2                       | 3,63E-07                | 8,34E-03            | <i>DPPA2P3</i>      | 33655                    | intron       |                     |                                                  |
| chr7:64540916-chr7:64540960      | 44            | 3                          | 0                       | 3                       | 3,69E-07                | 8,34E-03            | <i>BCO44608</i>     | 723                      | promoter     | enhancer            | <i>GTF2IP14</i>                                  |
| chr16:8960514-chr16:8960728      | 214           | 6                          | 0                       | 6                       | 3,71E-07                | 8,34E-03            | <i>CARHSP1</i>      | 587                      | promoter     |                     |                                                  |
| chr9:136074985-chr9:136075525    | 540           | 15                         | 15                      | 0                       | 5,51E-07                | 1,08E-02            | <i>OBP2B</i>        | 9153                     | intergenic   |                     |                                                  |
| chr14:19888706-chr14:19889624    | 918           | 13                         | 0                       | 13                      | 6,33E-07                | 1,13E-02            | <i>LINC00516</i>    | -4792                    | intron       |                     |                                                  |
| chr9:136063893-chr9:136063981    | 88            | 2                          | 0                       | 2                       | 6,82E-07                | 1,18E-02            | <i>OBP2B</i>        | 20648                    | intergenic   |                     |                                                  |
| chr1:43425385-chr1:43425514      | 129           | 7                          | 7                       | 0                       | 9,57E-07                | 1,53E-02            | <i>SLC2A1</i>       | -644                     | promoter     |                     | <i>SVBP, SLC2A1; SLC2A1-AS1</i>                  |
| chr5:1004130-chr5:1004250        | 120           | 6                          | 6                       | 0                       | 1,15E-06                | 1,74E-02            | <i>NKD2</i>         | -4827                    | intergenic   |                     |                                                  |
| chr10:71801559-chr10:71801791    | 232           | 2                          | 0                       | 2                       | 1,30E-06                | 1,88E-02            | <i>H2AFY2</i>       | -10798                   | intergenic   |                     |                                                  |
| chr4:961370-chr4:961649          | 279           | 21                         | 21                      | 0                       | 2,01E-06                | 2,65E-02            | <i>DGKQ</i>         | 5944                     | exon         |                     |                                                  |
| chr11:187771-chr11:187909        | 138           | 3                          | 3                       | 0                       | 2,42E-06                | 2,99E-02            | <i>SCGB1C1</i>      | -5309                    | intergenic   | enhancer            | <i>SCGB1C1, BET1L</i>                            |
| chr19:19976235-chr19:19976265    | 30            | 3                          | 3                       | 0                       | 2,71E-06                | 3,29E-02            | <i>ZNF253</i>       | -479                     | promoter     |                     |                                                  |
| chr2:107200907-chr2:107200963    | 56            | 9                          | 0                       | 9                       | 3,13E-06                | 3,52E-02            | <i>RGPD3</i>        | -116153                  | intergenic   |                     |                                                  |
| chr19:519384-chr19:519572        | 188           | 2                          | 0                       | 2                       | 3,25E-06                | 3,61E-02            | <i>Mir_324</i>      | 11692                    | exon         | enhancer            | <i>TPGS1</i>                                     |
| chr7:155327253-chr7:155327298    | 45            | 2                          | 0                       | 2                       | 3,59E-06                | 3,68E-02            | <i>CNPY1</i>        | -760                     | promoter     |                     |                                                  |
| chr13:106062680-chr13:106062745  | 65            | 6                          | 0                       | 6                       | 4,11E-06                | 4,09E-02            | <i>DAOA</i>         | -55499                   | intergenic   |                     |                                                  |
| chr1:151870613-chr1:151870743    | 130           | 4                          | 0                       | 4                       | 4,39E-06                | 4,23E-02            | <i>THEM4</i>        | 11749                    | intron       | enhancer            | <i>THEM4</i>                                     |
| chr6:52172154-chr6:52172175      | 21            | 2                          | 2                       | 0                       | 5,00E-06                | 4,67E-02            | <i>MCM3</i>         | -22476                   | intergenic   |                     |                                                  |
| chr18:8526512-chr18:8526669      | 157           | 2                          | 0                       | 2                       | 5,45E-06                | 4,86E-02            | <i>Metazoa_SRP</i>  | 54842                    | intergenic   |                     |                                                  |
| chr11:118842392-chr11:118842764  | 372           | 3                          | 3                       | 0                       | 6,61E-06                | 5,40E-02            | <i>FOXR1</i>        | 347                      | promoter     |                     |                                                  |
| chr17:72916021-chr17:72916113    | 92            | 7                          | 7                       | 0                       | 8,85E-06                | 6,35E-02            | <i>USH1G</i>        | 3275                     | exon         |                     |                                                  |
| chr5:172110665-chr5:172110770    | 105           | 7                          | 0                       | 7                       | 8,95E-06                | 6,39E-02            | <i>NEURL1B</i>      | 42391                    | exon         | enhancer            | <i>NEURL1B</i>                                   |
| chr2:176121784-chr2:176121927    | 143           | 6                          | 0                       | 6                       | 1,10E-05                | 7,07E-02            | <i>ATP5G3</i>       | -75360                   | intergenic   |                     |                                                  |
| chr4:186318341-chr4:186318356    | 15            | 3                          | 0                       | 3                       | 1,13E-05                | 7,07E-02            | <i>ANKRD37</i>      | 503                      | promoter     |                     |                                                  |
| chr1:145385315-chr1:145385536    | 221           | 4                          | 4                       | 0                       | 1,21E-05                | 7,33E-02            | <i>TRNA_Asn</i>     | -414                     | promoter     |                     |                                                  |
| chr10:1974873-chr10:1975086      | 213           | 5                          | 0                       | 5                       | 1,24E-05                | 7,33E-02            | <i>LINC00700</i>    | 81670                    | intergenic   |                     |                                                  |
| chr21:28215532-chr21:28215691    | 159           | 3                          | 0                       | 3                       | 1,25E-05                | 7,33E-02            | <i>ADAMTS1</i>      | 2197                     | intron       |                     |                                                  |

|                                 |      |    |   |    |          |          |                 |                   |          |                           |
|---------------------------------|------|----|---|----|----------|----------|-----------------|-------------------|----------|---------------------------|
| chr10:118885541-chr10:118885787 | 246  | 16 | 0 | 16 | 1,29E-05 | 7,33E-02 | <i>KIAA1598</i> | 468 promoter      |          |                           |
| chr11:55640097-chr11:55640479   | 382  | 15 | 0 | 15 | 1,42E-05 | 7,75E-02 | <i>TRIM51</i>   | -10401 intergenic |          |                           |
| chr9:70647209-chr9:70647363     | 154  | 11 | 0 | 11 | 1,47E-05 | 7,90E-02 | <i>AK056618</i> | 1220 exon         |          |                           |
| chr14:103227394-chr14:103227569 | 175  | 7  | 0 | 7  | 1,82E-05 | 8,61E-02 | <i>TRAF3</i>    | -16422 intergenic |          |                           |
| chr20:61642269-chr20:61642401   | 132  | 9  | 9 | 0  | 2,02E-05 | 9,18E-02 | <i>LOC63930</i> | 1626 intron       | enhancer | <i>BHLHE23; LINC01749</i> |
| chr2:73496132-chr2:73496413     | 281  | 21 | 0 | 21 | 2,04E-05 | 9,26E-02 | <i>FBXO41</i>   | 670 promoter      |          |                           |
| chr4:81118267-chr4:81119481     | 1214 | 14 | 0 | 14 | 2,12E-05 | 9,47E-02 | <i>PRDM8</i>    | 826 promoter      |          |                           |

**ESM Table 9. Differentially methylated CpGs identified in the CD4<sup>+</sup> T cell fraction between cases and controls prior to seroconversion**

| Methylation difference |          |          |                        | Nearest gene        |                          |              | Methylation-expression correlation analysis |                                                |                      | eQTM analysis |           |                 |                   |
|------------------------|----------|----------|------------------------|---------------------|--------------------------|--------------|---------------------------------------------|------------------------------------------------|----------------------|---------------|-----------|-----------------|-------------------|
| CpG site               | P value  | FDR      | Methylation difference | Nearest gene        | Distance to nearest gene | Genomic part | Nearest gene correlation, Spearman rho      | The highest observed correlation, Spearman rho | Correlating gene     | CpG name      | eQTM, FDR | Overall Z Score | CpG found on 450K |
| chr19:18118304         | 4,22E-22 | 1,64E-16 | -0.185                 | <i>ARRDC2</i>       | -673                     | promoter     | 0.169                                       | -0.402                                         | <i>IFI30</i>         | NA            | NA        | NA              | FALSE             |
| chr7:3169658           | 4,76E-13 | 4,62E-08 | 0.269                  | <i>BCO38729</i>     | 44630                    | intergenic   | NA                                          | 0.216                                          | <i>CARD11</i>        | NA            | NA        | NA              | FALSE             |
| chr10:99209697         | 1,95E-12 | 1,52E-07 | 0.541                  | <i>ZDHHC16</i>      | 3769                     | intron       | 0.306                                       | 0.484                                          | <i>MMS19</i>         | NA            | NA        | NA              | FALSE             |
| chr14:65542789         | 7,00E-12 | 3,88E-07 | -0.505                 | <i>LOC100506321</i> | -13847                   | intron       | NA                                          | 0.326                                          | <i>RP11-840I19.1</i> | NA            | NA        | NA              | FALSE             |
| chr8:530556            | 1,00E-11 | 4,87E-07 | -0.171                 | <i>TDRP</i>         | -34776                   | intergenic   | NA                                          | 0.283                                          | <i>FBXO25</i>        | NA            | NA        | NA              | FALSE             |
| chr2:27038329          | 1,50E-11 | 6,25E-07 | -0.226                 | <i>CENPA</i>        | 29449                    | intergenic   | NA                                          | 0.248                                          | <i>AGBL5</i>         | NA            | NA        | NA              | FALSE             |
| chr19:37807898         | 1,61E-11 | 6,25E-07 | 0.149                  | <i>HKR1</i>         | -915                     | promoter     | 0.057                                       | -0.509                                         | <i>ZNF527</i>        | NA            | NA        | NA              | FALSE             |
| chr2:113192477         | 6,97E-11 | 2,25E-06 | 0.145                  | <i>RGPD8</i>        | -416                     | promoter     | -0.248                                      | 0.467                                          | <i>TTL</i>           | NA            | NA        | NA              | FALSE             |
| chr2:27038339          | 8,15E-11 | 2,43E-06 | -0.23                  | <i>CENPA</i>        | 29459                    | intergenic   | NA                                          | 0.238                                          | <i>AGBL5</i>         | NA            | NA        | NA              | FALSE             |
| chr4:4355602           | 1,11E-10 | 3,08E-06 | 0.189                  | <i>NSG1</i>         | 5735                     | intron       | NA                                          | 0.228                                          | <i>TMEM128</i>       | NA            | NA        | NA              | FALSE             |
| chr2:27038313          | 1,44E-10 | 3,49E-06 | -0.216                 | <i>CENPA</i>        | 29433                    | intergenic   | NA                                          | -0.251                                         | <i>TMEM214</i>       | NA            | NA        | NA              | TRUE              |
| chr4:2307965           | 1,52E-10 | 3,49E-06 | 0.237                  | <i>ZFYVE28</i>      | 34844                    | intron       | -0.244                                      | -0.244                                         | <i>ZFYVE28</i>       | NA            | NA        | NA              | FALSE             |
| chr2:27038396          | 1,81E-10 | 3,90E-06 | -0.224                 | <i>CENPA</i>        | 29516                    | intergenic   | NA                                          | 0.251                                          | <i>AGBL5</i>         | NA            | NA        | NA              | FALSE             |
| chr2:27038406          | 2,55E-10 | 4,94E-06 | -0.214                 | <i>CENPA</i>        | 29526                    | intergenic   | NA                                          | -0.266                                         | <i>TMEM214</i>       | NA            | NA        | NA              | FALSE             |
| chr15:94335575         | 2,49E-10 | 4,94E-06 | 0.274                  | <i>BCO37497</i>     | 108254                   | intron       | NA                                          | NA                                             | <i>NA</i>            | NA            | NA        | NA              | FALSE             |
| chr2:27038408          | 4,85E-09 | 8,18E-05 | -0.21                  | <i>CENPA</i>        | 29528                    | intergenic   | NA                                          | -0.303                                         | <i>TMEM214</i>       | NA            | NA        | NA              | FALSE             |
| chr19:37807915         | 6,87E-09 | 1,07E-04 | 0.147                  | <i>HKR1</i>         | -898                     | promoter     | 0.083                                       | -0.489                                         | <i>ZNF527</i>        | NA            | NA        | NA              | FALSE             |
| chr2:27038368          | 7,72E-09 | 1,15E-04 | -0.222                 | <i>CENPA</i>        | 29488                    | intergenic   | NA                                          | 0.222                                          | <i>AGBL5</i>         | NA            | NA        | NA              | FALSE             |
| chr22:39633525         | 1,04E-08 | 1,49E-04 | 0.198                  | <i>PDGFB</i>        | 3390                     | intron       | NA                                          | -0.342                                         | <i>APOBEC3G</i>      | NA            | NA        | NA              | FALSE             |
| chr19:58571349         | 1,36E-08 | 1,75E-04 | 0.121                  | <i>ZNF135</i>       | 744                      | promoter     | NA                                          | -0.512                                         | <i>ZNF417</i>        | NA            | NA        | NA              | FALSE             |
| chr19:37807709         | 1,70E-08 | 2,06E-04 | 0.114                  | <i>HKR1</i>         | -1104                    | intron       | 0.028                                       | -0.445                                         | <i>ZNF527</i>        | NA            | NA        | NA              | FALSE             |
| chr5:270987            | 2,15E-08 | 2,53E-04 | 0.206                  | <i>PDCD6</i>        | -749                     | promoter     | 0.082                                       | 0.394                                          | <i>CTD-2083E4.4</i>  | NA            | NA        | NA              | FALSE             |
| chr22:39633541         | 2,94E-08 | 3,25E-04 | 0.171                  | <i>PDGFB</i>        | 3374                     | intron       | NA                                          | -0.379                                         | <i>APOBEC3D</i>      | NA            | NA        | NA              | FALSE             |
| chr8:98812754          | 3,12E-08 | 3,27E-04 | 0.695                  | <i>LAPTM4B</i>      | 24947                    | intron       | -0.182                                      | -0.446                                         | <i>MTDH</i>          | NA            | NA        | NA              | FALSE             |
| chr18:77398359         | 3,06E-08 | 3,27E-04 | 0.18                   | <i>CTDP1</i>        | -41442                   | intergenic   | 0.093                                       | 0.093                                          | <i>CTDP1</i>         | NA            | NA        | NA              | FALSE             |
| chr1:228659024         | 3,33E-08 | 3,40E-04 | 0.147                  | <i>Histone3</i>     | -7134                    | intergenic   | NA                                          | 0.136                                          | <i>TRIM11</i>        | NA            | NA        | NA              | FALSE             |
| chr19:37807906         | 3,45E-08 | 3,43E-04 | 0.224                  | <i>HKR1</i>         | -907                     | promoter     | 0.086                                       | -0.504                                         | <i>ZNF527</i>        | NA            | NA        | NA              | FALSE             |
| chr7:22860953          | 3,68E-08 | 3,56E-04 | -0.154                 | <i>TOMM7</i>        | 1519                     | intron       | 0.14                                        | -0.158                                         | <i>IL6</i>           | NA            | NA        | NA              | FALSE             |
| chr21:47285711         | 4,88E-08 | 4,61E-04 | -0.551                 | <i>PCBP3</i>        | 15838                    | intron       | -0.494                                      | -0.494                                         | <i>PCBP3</i>         | NA            | NA        | NA              | FALSE             |
| chr16:85522260         | 5,07E-08 | 4,68E-04 | -0.155                 | <i>GSE1</i>         | -122769                  | intergenic   | -0.05                                       | -0.05                                          | <i>GSE1</i>          | NA            | NA        | NA              | FALSE             |
| chr18:77398198         | 6,31E-08 | 5,69E-04 | 0.255                  | <i>CTDP1</i>        | -41603                   | intergenic   | -0.071                                      | -0.341                                         | <i>NFATC1</i>        | NA            | NA        | NA              | FALSE             |
| chr17:21294720         | 6,68E-08 | 5,89E-04 | -0.116                 | <i>KCNJ12</i>       | -13728                   | intron       | NA                                          | 0.318                                          | <i>TMEM11</i>        | NA            | NA        | NA              | FALSE             |
| chr19:37807945         | 7,23E-08 | 6,23E-04 | 0.129                  | <i>HKR1</i>         | -868                     | promoter     | 0.046                                       | -0.521                                         | <i>ZNF527</i>        | NA            | NA        | NA              | FALSE             |
| chr21:47307815         | 7,69E-08 | 6,48E-04 | -0.207                 | <i>PCBP3</i>        | -8307                    | intron       | -0.496                                      | -0.496                                         | <i>PCBP3</i>         | NA            | NA        | NA              | FALSE             |
| chr17:55095408         | 1,13E-07 | 9,16E-04 | 0.283                  | <i>RNF126P1</i>     | -27431                   | intergenic   | NA                                          | -0.356                                         | <i>AKAP1</i>         | NA            | NA        | NA              | FALSE             |
| chr14:103227394        | 1,19E-07 | 9,42E-04 | -0.205                 | <i>TRAF3</i>        | -16422                   | intergenic   | 0.4                                         | 0.4                                            | <i>TRAF3</i>         | NA            | NA        | NA              | FALSE             |

|                 |          |          |        |              |         |            |        |        |              |    |    |    |       |
|-----------------|----------|----------|--------|--------------|---------|------------|--------|--------|--------------|----|----|----|-------|
| chr2:130794726  | 1,29E-07 | 1,00E-03 | -0.186 | LOC440905    | -5236   | intron     | NA     | 0.232  | SMPD4        | NA | NA | NA | FALSE |
| chr12:32626634  | 1,42E-07 | 1,08E-03 | -0.387 | FGD4         | -12272  | intergenic | NA     | -0.239 | DNM1L        | NA | NA | NA | FALSE |
| chr6:13873766   | 1,56E-07 | 1,10E-03 | -0.112 | RNF182       | -50911  | intergenic | NA     | 0.195  | MCUR1        | NA | NA | NA | FALSE |
| chr9:136075435  | 1,56E-07 | 1,10E-03 | 0.178  | OBP2B        | 9194    | intergenic | NA     | -0.393 | SURF2        | NA | NA | NA | FALSE |
| chr11:116506019 | 1,67E-07 | 1,14E-03 | 0.143  | BUD13        | 137696  | intergenic | -0.044 | -0.23  | ZPR1         | NA | NA | NA | FALSE |
| chr22:47130395  | 1,94E-07 | 1,21E-03 | 0.149  | CERK         | 3758    | intron     | 0.136  | -0.34  | TBC1D22A     | NA | NA | NA | FALSE |
| chr19:37807937  | 2,11E-07 | 1,30E-03 | 0.19   | HKR1         | -876    | promoter   | 0.024  | -0.475 | ZNF527       | NA | NA | NA | FALSE |
| chr22:49447830  | 2,27E-07 | 1,33E-03 | 0.259  | LOC100128946 | 185250  | intergenic | NA     | NA     | NA           | NA | NA | NA | FALSE |
| chr7:22861070   | 3,74E-07 | 2,01E-03 | -0.179 | TOMM7        | 1402    | intron     | 0.296  | 0.296  | TOMM7        | NA | NA | NA | FALSE |
| chr9:137674072  | 4,05E-07 | 2,15E-03 | -0.198 | MIR3689C     | 67144   | intron     | NA     | -0.07  | FCN1         | NA | NA | NA | FALSE |
| chr19:2561793   | 4,47E-07 | 2,34E-03 | 0.273  | BC022568     | 82057   | intron     | NA     | 0.345  | THOP1        | NA | NA | NA | FALSE |
| chr1:7908887    | 5,23E-07 | 2,48E-03 | 0.484  | UTS2         | 4292    | intron     | NA     | 0.124  | PARK7        | NA | NA | NA | FALSE |
| chr10:71801791  | 5,16E-07 | 2,48E-03 | -0.147 | H2AFY2       | -10566  | intergenic | -0.066 | 0.352  | PPA1         | NA | NA | NA | FALSE |
| chr4:186808118  | 5,70E-07 | 2,66E-03 | -0.159 | SORBS2       | 69753   | intron     | NA     | NA     | NA           | NA | NA | NA | FALSE |
| chr15:93277255  | 7,08E-07 | 3,19E-03 | 0.211  | FAM174B      | 50      | promoter   | -0.228 | -0.265 | AC013394.2   | NA | NA | NA | FALSE |
| chr19:12035043  | 7,03E-07 | 3,19E-03 | 0.105  | ZNF700       | -840    | promoter   | 0.239  | -0.342 | CTD-2006C1.2 | NA | NA | NA | FALSE |
| chr19:58571295  | 7,18E-07 | 3,20E-03 | 0.116  | ZNF135       | 690     | promoter   | NA     | -0.356 | ZNF417       | NA | NA | NA | FALSE |
| chr16:452426    | 7,79E-07 | 3,36E-03 | -0.124 | DECR2        | 535     | promoter   | -0.496 | -0.623 | LA16c-OS12.2 | NA | NA | NA | FALSE |
| chr5:43000457   | 8,34E-07 | 3,52E-03 | -0.108 | AK056817     | -7023   | intergenic | NA     | 0.21   | ANXA2R       | NA | NA | NA | FALSE |
| chr9:137673894  | 1,08E-06 | 4,21E-03 | -0.271 | MIR3689C     | 67322   | intron     | NA     | 0.267  | FCN1         | NA | NA | NA | TRUE  |
| chr13:48892804  | 1,09E-06 | 4,22E-03 | -0.134 | RB1          | 14923   | intron     | -0.086 | 0.259  | MED4         | NA | NA | NA | FALSE |
| chr16:14637963  | 1,25E-06 | 4,75E-03 | -0.405 | PARN         | 86166   | intron     | 0.029  | 0.029  | PARN         | NA | NA | NA | FALSE |
| chr1:30911320   | 1,30E-06 | 4,84E-03 | -0.129 | MATN1-AS1    | -280299 | intergenic | 0.174  | NA     | NA           | NA | NA | NA | FALSE |
| chr4:961405     | 1,29E-06 | 4,84E-03 | 0.325  | DGKQ         | 5944    | exon       | 0.504  | 0.504  | DGKQ         | NA | NA | NA | FALSE |
| chr4:132897079  | 1,44E-06 | 5,18E-03 | -0.127 | BC131768     | 247828  | intergenic | NA     | NA     | NA           | NA | NA | NA | FALSE |
| chr3:171464841  | 1,62E-06 | 5,65E-03 | -0.102 | PLD1         | 63664   | intron     | NA     | NA     | NA           | NA | NA | NA | FALSE |
| chr4:39569133   | 1,72E-06 | 5,84E-03 | -0.371 | SMIM14       | 16446   | intron     | NA     | 0.398  | RFC1         | NA | NA | NA | FALSE |
| chr19:1336301   | 1,77E-06 | 5,90E-03 | 0.183  | MUM1         | -18675  | intergenic | -0.016 | -0.372 | C19orf24     | NA | NA | NA | FALSE |
| chr10:74082076  | 1,84E-06 | 6,01E-03 | 0.158  | DNAJB12      | 32832   | intergenic | -0.078 | 0.268  | SPOCK2       | NA | NA | NA | FALSE |
| chr10:134499085 | 2,33E-06 | 7,17E-03 | -0.229 | INPP5A       | 77668   | intron     | -0.318 | -0.318 | INPP5A       | NA | NA | NA | FALSE |
| chr19:609136    | 2,44E-06 | 7,34E-03 | -0.138 | HCN2         | 19245   | intron     | NA     | -0.416 | POLRMT       | NA | NA | NA | FALSE |
| chr7:64540896   | 2,66E-06 | 7,76E-03 | -0.184 | BC044608     | 743     | promoter   | NA     | 0.408  | ZNF273       | NA | NA | NA | FALSE |
| chr22:44530074  | 2,95E-06 | 8,40E-03 | 0.161  | TRNA_SeC     | -16463  | intron     | NA     | 0.217  | SAMM50       | NA | NA | NA | FALSE |
| chr3:196694364  | 3,06E-06 | 8,65E-03 | -0.258 | PIGZ         | 1341    | intron     | NA     | -0.381 | AC127904.2   | NA | NA | NA | FALSE |
| chr16:4751653   | 3,14E-06 | 8,75E-03 | -0.126 | ANKS3        | -1350   | intron     | -0.064 | 0.377  | NUDT16L1     | NA | NA | NA | FALSE |
| chr11:122427550 | 3,37E-06 | 9,14E-03 | -0.203 | TRNA_Lys     | -3105   | intergenic | NA     | -0.024 | UBASH3B      | NA | NA | NA | FALSE |
| chr17:14362402  | 3,81E-06 | 9,72E-03 | -0.113 | MGC12916     | 155347  | intergenic | 0.039  | -0.186 | HS3ST3B1     | NA | NA | NA | FALSE |
| chr18:77398164  | 3,96E-06 | 1,00E-02 | 0.174  | CTDP1        | -41637  | intergenic | 0.109  | -0.129 | NFATC1       | NA | NA | NA | FALSE |
| chr11:122427606 | 4,02E-06 | 1,01E-02 | -0.214 | TRNA_Lys     | -3049   | intergenic | NA     | -0.041 | UBASH3B      | NA | NA | NA | FALSE |
| chr4:961427     | 4,86E-06 | 1,16E-02 | 0.246  | DGKQ         | 5922    | exon       | 0.434  | 0.434  | DGKQ         | NA | NA | NA | FALSE |
| chr22:23552492  | 4,88E-06 | 1,16E-02 | -0.168 | BCR          | -6444   | intron     | -0.391 | -0.391 | BCR          | NA | NA | NA | FALSE |
| chr2:113192407  | 5,26E-06 | 1,22E-02 | 0.139  | RGPD8        | -346    | promoter   | -0.022 | 0.336  | TTL          | NA | NA | NA | FALSE |
| chr8:95962383   | 5,46E-06 | 1,22E-02 | -0.103 | TP53INP1     | -769    | promoter   | -0.428 | -0.428 | TP53INP1     | NA | NA | NA | TRUE  |



|                 |          |          |        |                     |        |            |        |        |                   |    |    |    |       |
|-----------------|----------|----------|--------|---------------------|--------|------------|--------|--------|-------------------|----|----|----|-------|
| chr6:28459146   | 5,92E-06 | 1,30E-02 | -0.107 | <i>TRNA_Thr</i>     | -2304  | intergenic | NA     | -0.177 | <i>ZSCAN26</i>    | NA | NA | NA | FALSE |
| chr9:136075389  | 5,97E-06 | 1,31E-02 | 0.111  | <i>OBP2B</i>        | 9240   | intergenic | NA     | 0.3    | <i>RPL7A</i>      | NA | NA | NA | FALSE |
| chr9:136075393  | 6,07E-06 | 1,32E-02 | 0.149  | <i>OBP2B</i>        | 9236   | intergenic | NA     | -0.306 | <i>CACFD1</i>     | NA | NA | NA | TRUE  |
| chr13:21900452  | 6,16E-06 | 1,34E-02 | -0.102 | <i>MIPEPP3</i>      | 28190  | intron     | NA     | 0.482  | <i>ZDHHC20</i>    | NA | NA | NA | FALSE |
| chr16:89050592  | 6,80E-06 | 1,43E-02 | 0.247  | <i>CBFA2T3</i>      | -7089  | intergenic | NA     | 0.197  | <i>ACSF3</i>      | NA | NA | NA | FALSE |
| chr20:56247315  | 6,78E-06 | 1,43E-02 | -0.101 | <i>PMEPA1</i>       | 18366  | intron     | 0.105  | -0.253 | <i>ZBP1</i>       | NA | NA | NA | FALSE |
| chr19:37807939  | 8,29E-06 | 1,65E-02 | 0.167  | <i>HKR1</i>         | -874   | promoter   | 0.018  | -0.436 | <i>ZNF570</i>     | NA | NA | NA | FALSE |
| chr19:30544746  | 8,44E-06 | 1,66E-02 | 0.2    | <i>URI1</i>         | 68647  | intergenic | 0.116  | -0.234 | <i>CCNE1</i>      | NA | NA | NA | FALSE |
| chr7:98029163   | 8,81E-06 | 1,67E-02 | -0.123 | <i>BAIAP2L1</i>     | 1265   | intron     | NA     | 0.243  | <i>BRI3</i>       | NA | NA | NA | FALSE |
| chr10:15038016  | 8,55E-06 | 1,67E-02 | 0.109  | <i>DCLRE1C</i>      | 25847  | intron     | 0.232  | 0.232  | <i>DCLRE1C</i>    | NA | NA | NA | FALSE |
| chr18:60278811  | 8,66E-06 | 1,67E-02 | 0.157  | <i>DKFZp451A185</i> | 29775  | intergenic | NA     | 0.246  | <i>ZCCHC2</i>     | NA | NA | NA | FALSE |
| chr3:193693011  | 9,32E-06 | 1,68E-02 | -0.144 | <i>DPPA2P3</i>      | 19017  | intron     | NA     | -0.014 | <i>HES1</i>       | NA | NA | NA | FALSE |
| chr15:101661806 | 9,37E-06 | 1,68E-02 | -0.259 | <i>CHSY1</i>        | 66461  | intergenic | 0.069  | 0.23   | <i>VIMP</i>       | NA | NA | NA | FALSE |
| chr15:93277269  | 9,62E-06 | 1,71E-02 | 0.204  | <i>FAM174B</i>      | 36     | promoter   | -0.194 | -0.269 | <i>ACO13394.2</i> | NA | NA | NA | FALSE |
| chr17:48586137  | 9,66E-06 | 1,71E-02 | 0.168  | <i>MYCBPAP</i>      | 394    | promoter   | NA     | -0.51  | <i>ANKRD40</i>    | NA | NA | NA | FALSE |
| chr18:77474920  | 1,02E-05 | 1,75E-02 | -0.244 | <i>CTDP1</i>        | 33492  | exon       | -0.418 | -0.446 | <i>PQLC1</i>      | NA | NA | NA | FALSE |
| chr11:43321894  | 1,03E-05 | 1,76E-02 | -0.299 | <i>API5</i>         | -11611 | intergenic | 0.135  | -0.139 | <i>TTC17</i>      | NA | NA | NA | FALSE |
| chr2:113192512  | 1,05E-05 | 1,76E-02 | 0.142  | <i>RGPD8</i>        | -451   | promoter   | 0.107  | 0.375  | <i>POLR1B</i>     | NA | NA | NA | FALSE |
| chr5:176874966  | 1,08E-05 | 1,80E-02 | -0.195 | <i>PRR7-AS1</i>     | -22    | promoter   | -0.151 | -0.475 | <i>RGS14</i>      | NA | NA | NA | FALSE |
| chr22:17199041  | 1,09E-05 | 1,80E-02 | -0.116 | <i>BC038197</i>     | 30288  | intergenic | NA     | 0.182  | <i>TPTEP1</i>     | NA | NA | NA | FALSE |
| chr14:103227458 | 1,17E-05 | 1,87E-02 | -0.159 | <i>TRAF3</i>        | -16358 | intergenic | 0.324  | 0.324  | <i>TRAF3</i>      | NA | NA | NA | FALSE |
| chr18:60278889  | 1,18E-05 | 1,87E-02 | 0.163  | <i>DKFZp451A185</i> | 29853  | intergenic | NA     | 0.069  | <i>PHLPP1</i>     | NA | NA | NA | FALSE |
| chr13:48892827  | 1,23E-05 | 1,91E-02 | -0.149 | <i>RB1</i>          | 14946  | intron     | -0.119 | 0.256  | <i>MED4</i>       | NA | NA | NA | FALSE |
| chr19:18118337  | 1,23E-05 | 1,91E-02 | -0.122 | <i>ARRDC2</i>       | -640   | promoter   | 0.14   | -0.465 | <i>IFI30</i>      | NA | NA | NA | FALSE |
| chr19:58521598  | 1,30E-05 | 1,99E-02 | 0.13   | <i>ZNF606</i>       | -6885  | intergenic | -0.228 | -0.372 | <i>ZNF417</i>     | NA | NA | NA | FALSE |
| chr12:133304192 | 1,38E-05 | 2,08E-02 | -0.142 | <i>ANKLE2</i>       | 7084   | intron     | -0.22  | -0.248 | <i>FBRSL1</i>     | NA | NA | NA | FALSE |
| chr5:13939870   | 1,41E-05 | 2,11E-02 | 0.118  | <i>DNAH5</i>        | 4720   | intron     | NA     | -0.24  | <i>TRIO</i>       | NA | NA | NA | FALSE |
| chr16:2892482   | 1,48E-05 | 2,17E-02 | -0.12  | <i>PRSS30P</i>      | -10    | promoter   | NA     | -0.449 | <i>AC141586.5</i> | NA | NA | NA | FALSE |
| chr19:37807762  | 1,49E-05 | 2,17E-02 | 0.138  | <i>HKR1</i>         | -1051  | intron     | 0.078  | -0.54  | <i>ZNF527</i>     | NA | NA | NA | FALSE |
| chr2:74643306   | 1,50E-05 | 2,18E-02 | 0.139  | <i>DQ588163</i>     | 734    | promoter   | NA     | -0.335 | <i>INO80B</i>     | NA | NA | NA | FALSE |
| chr15:70871818  | 1,56E-05 | 2,23E-02 | -0.122 | <i>UACA</i>         | 122803 | intergenic | NA     | NA     | <i>NA</i>         | NA | NA | NA | FALSE |
| chr5:78337539   | 1,58E-05 | 2,25E-02 | -0.188 | <i>DMGDH</i>        | 12633  | intron     | NA     | 0.404  | <i>JMY</i>        | NA | NA | NA | FALSE |
| chr11:67297539  | 1,59E-05 | 2,26E-02 | -0.199 | <i>CABP2</i>        | -6641  | intergenic | NA     | -0.513 | <i>RAD9A</i>      | NA | NA | NA | FALSE |
| chr19:5131204   | 1,63E-05 | 2,30E-02 | -0.154 | <i>BC032415</i>     | 17313  | exon       | NA     | -0.336 | <i>KDM4B</i>      | NA | NA | NA | FALSE |
| chr10:31040696  | 1,64E-05 | 2,30E-02 | 0.143  | <i>AK302694</i>     | 59495  | intergenic | NA     | 0.193  | <i>ZNF438</i>     | NA | NA | NA | FALSE |
| chr3:50231090   | 1,67E-05 | 2,32E-02 | 0.133  | <i>GNAT1</i>        | 2049   | exon       | NA     | -0.53  | <i>RASSF1</i>     | NA | NA | NA | FALSE |
| chr4:132897092  | 1,68E-05 | 2,32E-02 | -0.121 | <i>BC131768</i>     | 247841 | intergenic | NA     | NA     | <i>NA</i>         | NA | NA | NA | FALSE |
| chr16:32289963  | 1,68E-05 | 2,32E-02 | -0.122 | <i>LOC390705</i>    | 11340  | intergenic | NA     | NA     | <i>NA</i>         | NA | NA | NA | FALSE |
| chr12:281357    | 1,76E-05 | 2,40E-02 | -0.145 | <i>LOC574538</i>    | -23026 | intron     | NA     | 0.226  | <i>CCDC77</i>     | NA | NA | NA | FALSE |
| chr6:163570179  | 1,86E-05 | 2,50E-02 | -0.294 | <i>AK296276</i>     | 42662  | intron     | NA     | NA     | <i>NA</i>         | NA | NA | NA | FALSE |
| chr10:110075780 | 1,88E-05 | 2,50E-02 | -0.143 | <i>GSK</i>          | 625289 | intergenic | NA     | NA     | <i>NA</i>         | NA | NA | NA | FALSE |
| chr11:67351952  | 1,92E-05 | 2,53E-02 | -0.104 | <i>GSTP1</i>        | 888    | promoter   | -0.567 | -0.567 | <i>GSTP1</i>      | NA | NA | NA | FALSE |
| chr18:709266    | 1,99E-05 | 2,59E-02 | -0.121 | <i>ENOSF1</i>       | 3252   | intron     | 0.049  | 0.049  | <i>ENOSF1</i>     | NA | NA | NA | FALSE |

|                 |          |          |        |              |         |            |        |        |               |    |    |    |       |
|-----------------|----------|----------|--------|--------------|---------|------------|--------|--------|---------------|----|----|----|-------|
| chr9:137673849  | 2,01E-05 | 2,60E-02 | -0.31  | MIR3689C     | 67367   | intron     | NA     | 0.202  | FCN1          | NA | NA | NA | FALSE |
| chr14:65542732  | 2,05E-05 | 2,64E-02 | 0.172  | LOC100506321 | -13904  | intron     | NA     | -0.375 | RP11-840I19.1 | NA | NA | NA | FALSE |
| chr14:19888778  | 2,07E-05 | 2,64E-02 | -0.133 | LINC00516    | -5591   | intron     | NA     | NA     | NA            | NA | NA | NA | FALSE |
| chr1:54869222   | 2,17E-05 | 2,71E-02 | 0.171  | SSBP3        | 2847    | intron     | 0.051  | 0.205  | SSBP3-AS1     | NA | NA | NA | FALSE |
| chr7:76129418   | 2,18E-05 | 2,71E-02 | -0.186 | DTX2         | 301     | promoter   | -0.36  | -0.491 | UPK3B         | NA | NA | NA | FALSE |
| chr22:49447747  | 2,16E-05 | 2,71E-02 | 0.229  | LOC100128946 | 185167  | intergenic | NA     | NA     | NA            | NA | NA | NA | FALSE |
| chr10:102467237 | 2,21E-05 | 2,74E-02 | -0.116 | PAX2         | -38231  | intergenic | NA     | -0.338 | SEC31B        | NA | NA | NA | FALSE |
| chr19:19778825  | 2,23E-05 | 2,75E-02 | 0.122  | ZNF101       | -838    | promoter   | -0.104 | -0.415 | ZNF506        | NA | NA | NA | FALSE |
| chr8:41188402   | 2,27E-05 | 2,76E-02 | -0.132 | SFRP1        | -21413  | intergenic | NA     | 0.453  | GOLGA7        | NA | NA | NA | FALSE |
| chr1:7843461    | 2,30E-05 | 2,77E-02 | 0.102  | PER3         | -919    | promoter   | -0.301 | -0.301 | PER3          | NA | NA | NA | FALSE |
| chr10:82131783  | 2,39E-05 | 2,83E-02 | 0.425  | DYDC2        | 15261   | intergenic | NA     | 0.118  | TSPAN14       | NA | NA | NA | FALSE |
| chr16:88453894  | 2,40E-05 | 2,83E-02 | 0.198  | ZNF469       | -39985  | intergenic | NA     | -0.149 | ZC3H18        | NA | NA | NA | FALSE |
| chr7:1371590    | 2,42E-05 | 2,84E-02 | -0.124 | UNCX         | 98938   | intergenic | NA     | -0.36  | INTS1         | NA | NA | NA | FALSE |
| chr9:137674085  | 2,45E-05 | 2,84E-02 | -0.125 | MIR3689C     | 67131   | intron     | NA     | -0.047 | FCN1          | NA | NA | NA | FALSE |
| chr5:26326478   | 2,61E-05 | 2,98E-02 | 0.116  | TRNA_Lys     | -127868 | intergenic | NA     | NA     | NA            | NA | NA | NA | FALSE |
| chr19:22700771  | 2,65E-05 | 3,01E-02 | 0.166  | LOC440518    | -78288  | intergenic | NA     | NA     | NA            | NA | NA | NA | FALSE |
| chr1:43814632   | 2,69E-05 | 3,03E-02 | -0.175 | CDC20        | -9994   | exon       | NA     | 0.147  | MED8          | NA | NA | NA | FALSE |
| chr2:130794732  | 2,71E-05 | 3,05E-02 | -0.204 | LOC440905    | -5242   | intron     | NA     | 0.241  | MZT2B         | NA | NA | NA | FALSE |
| chr12:32626644  | 2,80E-05 | 3,10E-02 | -0.35  | FGD4         | -12262  | intergenic | NA     | -0.223 | DNM1L         | NA | NA | NA | FALSE |
| chr2:204103125  | 3,05E-05 | 3,18E-02 | -0.121 | CYP20A1      | -39     | promoter   | -0.031 | 0.045  | ABI2          | NA | NA | NA | FALSE |
| chr1:178456070  | 3,11E-05 | 3,22E-02 | 0.114  | TEX35        | -26142  | intergenic | NA     | -0.1   | RP11-428K3.1  | NA | NA | NA | FALSE |
| chr7:76129273   | 3,28E-05 | 3,34E-02 | -0.174 | DTX2         | 156     | promoter   | -0.501 | -0.536 | UPK3B         | NA | NA | NA | FALSE |
| chr8:11086991   | 3,68E-05 | 3,57E-02 | -0.186 | XKR6         | -28117  | intergenic | NA     | -0.052 | AF131216.6    | NA | NA | NA | FALSE |
| chr2:1817426    | 4,12E-05 | 3,80E-02 | 0.203  | MYT1L        | 29233   | intron     | NA     | -0.476 | PXDN          | NA | NA | NA | FALSE |
| chr8:120951820  | 4,12E-05 | 3,80E-02 | 0.175  | DEPTOR       | 65922   | intron     | NA     | -0.011 | TAF2          | NA | NA | NA | FALSE |
| chr7:128580230  | 4,14E-05 | 3,82E-02 | 0.216  | IRF5         | -542    | promoter   | -0.169 | -0.319 | TNPO3         | NA | NA | NA | FALSE |
| chr1:178456064  | 4,19E-05 | 3,83E-02 | 0.121  | TEX35        | -26148  | intergenic | NA     | -0.059 | RALGPS2       | NA | NA | NA | FALSE |
| chr4:961370     | 4,18E-05 | 3,83E-02 | 0.156  | DGKQ         | 5979    | exon       | 0.438  | 0.438  | DGKQ          | NA | NA | NA | FALSE |
| chr2:73496134   | 4,29E-05 | 3,84E-02 | -0.105 | FBXO41       | 715     | promoter   | 0.016  | -0.266 | ALMS1-IT1     | NA | NA | NA | FALSE |
| chr12:118421892 | 4,56E-05 | 4,02E-02 | 0.269  | KSR2         | -15865  | intergenic | NA     | -0.278 | RFC5          | NA | NA | NA | FALSE |
| chr22:26323697  | 4,61E-05 | 4,03E-02 | -0.149 | MYO18B       | -27448  | intron     | NA     | NA     | NA            | NA | NA | NA | FALSE |
| chr19:1097295   | 4,77E-05 | 4,07E-02 | -0.342 | POLR2E       | -1905   | intergenic | 0.152  | 0.406  | GPX4          | NA | NA | NA | FALSE |
| chr5:179193600  | 4,95E-05 | 4,17E-02 | -0.197 | LTC4S        | -27386  | exon       | NA     | -0.548 | RUFY1         | NA | NA | NA | FALSE |
| chr11:68782089  | 5,24E-05 | 4,36E-02 | -0.11  | MARGPRF      | -1240   | intron     | NA     | -0.219 | TPCN2         | NA | NA | NA | FALSE |
| chr16:67997921  | 5,24E-05 | 4,36E-02 | -0.187 | SLC12A4      | 48      | promoter   | -0.08  | -0.257 | DUS2          | NA | NA | NA | TRUE  |
| chr6:121069653  | 5,26E-05 | 4,36E-02 | -0.118 | C6orf170     | 488556  | intergenic | NA     | NA     | NA            | NA | NA | NA | FALSE |
| chr7:75280121   | 5,32E-05 | 4,40E-02 | -0.117 | HIP1         | 88163   | intron     | NA     | 0.273  | RHBDD2        | NA | NA | NA | FALSE |
| chr22:25233624  | 5,51E-05 | 4,49E-02 | 0.164  | SGSM1        | -5803   | intron     | NA     | -0.212 | NA            | NA | NA | NA | FALSE |
| chr22:44529998  | 5,58E-05 | 4,53E-02 | 0.131  | TRNA_SeC     | -16539  | intron     | NA     | 0.249  | SAMM50        | NA | NA | NA | FALSE |
| chr1:21380201   | 6,06E-05 | 4,74E-02 | 0.208  | EIF4G3       | -2715   | intron     | 0.149  | 0.207  | RP5-1071N3.1  | NA | NA | NA | FALSE |
| chr19:728131    | 6,06E-05 | 4,74E-02 | -0.151 | PALM         | 347     | promoter   | NA     | -0.388 | POLRMT        | NA | NA | NA | FALSE |
| chr1:178456078  | 6,22E-05 | 4,77E-02 | 0.105  | TEX35        | -26134  | intergenic | NA     | -0.141 | RP11-428K3.1  | NA | NA | NA | FALSE |
| chr19:48000364  | 6,19E-05 | 4,77E-02 | -0.122 | NAPA-AS1     | 12827   | intron     | 0.026  | 0.35   | GLTSCR2       | NA | NA | NA | TRUE  |

|                 |            |          |        |                     |         |            |        |        |                     |    |    |    |       |
|-----------------|------------|----------|--------|---------------------|---------|------------|--------|--------|---------------------|----|----|----|-------|
| chr4:132897121  | 6,63E-05   | 4,93E-02 | -0.106 | <i>BC131768</i>     | 247870  | intergenic | NA     | NA     | <i>NA</i>           | NA | NA | NA | FALSE |
| chr2:131695535  | 6,79E-05   | 5,00E-02 | -0.214 | <i>ARHGEF4</i>      | 7012    | intron     | -0.052 | 0.6    | <i>FAM168B</i>      | NA | NA | NA | FALSE |
| chr3:171464959  | 7,44E-05   | 5,33E-02 | -0.115 | <i>PLD1</i>         | 63546   | intron     | NA     | NA     | <i>NA</i>           | NA | NA | NA | FALSE |
| chr22:49447896  | 7,76E-05   | 5,45E-02 | 0.258  | <i>LOC100128946</i> | 185316  | intergenic | NA     | NA     | <i>NA</i>           | NA | NA | NA | FALSE |
| chr11:122427556 | 7,86E-05   | 5,46E-02 | -0.202 | <i>TRNA_Lys</i>     | -3099   | intergenic | NA     | -0.059 | <i>UBASH3B</i>      | NA | NA | NA | FALSE |
| chr4:675792     | 7,92E-05   | 5,46E-02 | -0.133 | <i>MFSD7</i>        | 3099    | exon       | NA     | -0.392 | <i>ATP5I</i>        | NA | NA | NA | FALSE |
| chr4:186318341  | 8,23E-05   | 5,63E-02 | -0.151 | <i>ANKRD37</i>      | 503     | promoter   | 0.127  | 0.35   | <i>SNX25</i>        | NA | NA | NA | FALSE |
| chr6:9971838    | 8,50E-05   | 5,72E-02 | -0.103 | <i>OFCC1</i>        | 5995    | intron     | NA     | NA     | <i>NA</i>           | NA | NA | NA | FALSE |
| chr13:48892838  | 8,78E-05   | 5,79E-02 | -0.142 | <i>RB1</i>          | 14957   | intron     | 0.01   | 0.227  | <i>ITM2B</i>        | NA | NA | NA | FALSE |
| chr16:89050546  | 8,82E-05   | 5,80E-02 | 0.235  | <i>CBFA2T3</i>      | -7043   | intergenic | NA     | -0.294 | <i>APRT</i>         | NA | NA | NA | FALSE |
| chr22:49448504  | 8,87E-05   | 5,81E-02 | 0.114  | <i>LOC100128946</i> | 185924  | intergenic | NA     | NA     | <i>NA</i>           | NA | NA | NA | FALSE |
| chr4:961400     | 9,04E-05   | 5,84E-02 | 0.239  | <i>DGKQ</i>         | 5949    | exon       | 0.339  | 0.339  | <i>DGKQ</i>         | NA | NA | NA | FALSE |
| chr1:110939144  | 9,56E-05   | 5,95E-02 | -0.211 | <i>SLC16A4</i>      | -5441   | intergenic | NA     | 0.338  | <i>RBM15</i>        | NA | NA | NA | FALSE |
| chr3:171464839  | 9,40E-05   | 5,95E-02 | -0.102 | <i>PLD1</i>         | 63666   | intron     | NA     | NA     | <i>NA</i>           | NA | NA | NA | FALSE |
| chr6:28459170   | 9,78E-05   | 6,03E-02 | -0.102 | <i>TRNA_Thr</i>     | -2328   | intergenic | NA     | -0.237 | <i>PGBD1</i>        | NA | NA | NA | FALSE |
| chr7:22860983   | 9,83E-05   | 6,04E-02 | -0.224 | <i>TOMM7</i>        | 1489    | intron     | 0.12   | -0.287 | <i>AC005682.5</i>   | NA | NA | NA | FALSE |
| chr2:1817753    | 9,85E-05   | 6,05E-02 | 0.174  | <i>MYT1L</i>        | 28906   | intron     | NA     | -0.629 | <i>PXDN</i>         | NA | NA | NA | FALSE |
| chr10:132961346 | 9,90E-05   | 6,06E-02 | -0.15  | <i>TCERG1L</i>      | 97362   | intron     | NA     | NA     | <i>NA</i>           | NA | NA | NA | FALSE |
| chr4:961408     | 9,96E-05   | 6,07E-02 | 0.291  | <i>DGKQ</i>         | 5941    | exon       | 0.276  | 0.276  | <i>DGKQ</i>         | NA | NA | NA | FALSE |
| chr12:127631111 | 0,00010069 | 6,12E-02 | -0.154 | <i>BC032874</i>     | -86170  | intergenic | NA     | NA     | <i>NA</i>           | NA | NA | NA | FALSE |
| chr17:28563513  | 0,00010457 | 6,27E-02 | 0.158  | <i>SLC6A4</i>       | -528    | promoter   | NA     | -0.218 | <i>BLMH</i>         | NA | NA | NA | FALSE |
| chr1:152161883  | 0,00010489 | 6,27E-02 | 0.114  | <i>RPTN</i>         | -30180  | intergenic | NA     | 0.338  | <i>S100A10</i>      | NA | NA | NA | FALSE |
| chr3:196694374  | 0,00010563 | 6,30E-02 | -0.246 | <i>PIGZ</i>         | 1331    | intron     | NA     | -0.153 | <i>AC127904.2</i>   | NA | NA | NA | FALSE |
| chr4:3835991    | 0,00010941 | 6,38E-02 | -0.164 | <i>ADRA2C</i>       | 67697   | intergenic | NA     | NA     | <i>NA</i>           | NA | NA | NA | FALSE |
| chr4:2062464    | 0,00010972 | 6,39E-02 | -0.145 | <i>NAT8L</i>        | 1227    | intron     | NA     | -0.255 | <i>LETM1</i>        | NA | NA | NA | FALSE |
| chr8:99017504   | 0,00011092 | 6,40E-02 | 0.104  | <i>SNORA72</i>      | 36942   | intron     | 0.07   | -0.208 | <i>HRSP12</i>       | NA | NA | NA | FALSE |
| chr7:95181231   | 0,00011299 | 6,44E-02 | -0.142 | <i>PDK4</i>         | 40842   | intergenic | NA     | 0.045  | <i>PON2</i>         | NA | NA | NA | FALSE |
| chr11:472217    | 0,00011345 | 6,44E-02 | 0.107  | <i>PTDSS2</i>       | 21939   | intron     | 0.399  | 0.419  | <i>RP11-326C3.1</i> | NA | NA | NA | FALSE |
| chr18:77398054  | 0,00011344 | 6,44E-02 | 0.102  | <i>CTDP1</i>        | -41747  | intergenic | 0.042  | -0.184 | <i>NFATC1</i>       | NA | NA | NA | FALSE |
| chr1:96689954   | 0,00011943 | 6,66E-02 | 0.505  | <i>7SK</i>          | 471770  | intergenic | NA     | NA     | <i>NA</i>           | NA | NA | NA | FALSE |
| chr7:69896013   | 0,000121   | 6,71E-02 | 0.17   | <i>AUTS2</i>        | -335235 | intron     | 0.303  | NA     | <i>NA</i>           | NA | NA | NA | FALSE |
| chr11:818429    | 0,00012181 | 6,74E-02 | -0.128 | <i>PNPLA2</i>       | -472    | promoter   | -0.024 | -0.488 | <i>TALDO1</i>       | NA | NA | NA | FALSE |
| chr1:62752894   | 0,00012368 | 6,79E-02 | -0.248 | <i>KANK4</i>        | -14432  | intron     | NA     | 0.275  | <i>USP1</i>         | NA | NA | NA | FALSE |
| chr2:241143204  | 0,00012368 | 6,79E-02 | -0.174 | <i>OTOS</i>         | -63132  | intergenic | NA     | 0.167  | <i>NDUFA10</i>      | NA | NA | NA | FALSE |
| chr19:1047217   | 0,00012413 | 6,80E-02 | 0.266  | <i>ABCA7</i>        | 4558    | exon       | -0.28  | -0.458 | <i>WDR18</i>        | NA | NA | NA | FALSE |
| chr22:44530028  | 0,00013526 | 7,14E-02 | 0.196  | <i>TRNA_SeC</i>     | -16509  | intron     | NA     | 0.305  | <i>PARVB</i>        | NA | NA | NA | FALSE |
| chr9:137674016  | 0,0001358  | 7,15E-02 | -0.216 | <i>MIR3689C</i>     | 67200   | intron     | NA     | -0.079 | <i>FCN1</i>         | NA | NA | NA | FALSE |
| chr5:1246448    | 0,00014109 | 7,30E-02 | 0.173  | <i>SLC6A18</i>      | 20980   | intergenic | NA     | 0.22   | <i>CLPTM1L</i>      | NA | NA | NA | FALSE |
| chr8:144659988  | 0,00014284 | 7,35E-02 | 0.104  | <i>NAPRT1</i>       | 526     | promoter   | -0.6   | -0.6   | <i>NAPRT1</i>       | NA | NA | NA | FALSE |
| chr1:42105342   | 0,00014554 | 7,44E-02 | -0.171 | <i>HIVEP3</i>       | -54354  | intron     | 0.124  | NA     | <i>NA</i>           | NA | NA | NA | FALSE |
| chr1:181944035  | 0,00014563 | 7,44E-02 | -0.158 | <i>ZNF648</i>       | 83111   | intergenic | NA     | NA     | <i>NA</i>           | NA | NA | NA | FALSE |
| chr7:76129434   | 0,00014897 | 7,54E-02 | -0.174 | <i>DTX2</i>         | 317     | promoter   | -0.409 | -0.514 | <i>UPK3B</i>        | NA | NA | NA | FALSE |
| chr2:47015505   | 0,00015579 | 7,73E-02 | -0.27  | <i>LOC388948</i>    | -28302  | intergenic | NA     | -0.449 | <i>RHOQ</i>         | NA | NA | NA | FALSE |

|                 |            |          |        |                     |         |            |        |        |                 |    |    |    |       |
|-----------------|------------|----------|--------|---------------------|---------|------------|--------|--------|-----------------|----|----|----|-------|
| chr2:232348540  | 0,00015672 | 7,73E-02 | 0.139  | <i>NCL</i>          | -19336  | intergenic | -0.177 | -0.177 | <i>NCL</i>      | NA | NA | NA | FALSE |
| chr14:19889020  | 0,00015671 | 7,73E-02 | -0.166 | <i>LINC00516</i>    | -5349   | intron     | NA     | NA     | <i>NA</i>       | NA | NA | NA | FALSE |
| chr20:56247302  | 0,00015696 | 7,73E-02 | -0.109 | <i>PMEP1</i>        | 18379   | intron     | 0.161  | -0.334 | <i>ZBP1</i>     | NA | NA | NA | TRUE  |
| chr22:49447907  | 0,00015645 | 7,73E-02 | 0.294  | <i>LOC100128946</i> | 185327  | intergenic | NA     | NA     | <i>NA</i>       | NA | NA | NA | FALSE |
| chr21:46677404  | 0,00016064 | 7,83E-02 | 0.215  | <i>POFUT2</i>       | 19922   | intron     | -0.078 | -0.375 | <i>ADARB1</i>   | NA | NA | NA | FALSE |
| chr10:1416894   | 0,00016394 | 7,96E-02 | -0.234 | <i>ADARB2-AS1</i>   | -151931 | intron     | NA     | NA     | <i>NA</i>       | NA | NA | NA | FALSE |
| chr6:163570442  | 0,00016635 | 8,05E-02 | -0.143 | <i>AK296276</i>     | 42399   | intron     | NA     | NA     | <i>NA</i>       | NA | NA | NA | FALSE |
| chr1:43425452   | 0,00017051 | 8,13E-02 | 0.164  | <i>SLC2A1</i>       | -606    | promoter   | -0.144 | -0.309 | <i>EBNA1BP2</i> | NA | NA | NA | FALSE |
| chr11:42895488  | 0,00017076 | 8,13E-02 | 0.308  | <i>HNRNP3</i>       | 395432  | intergenic | NA     | NA     | <i>NA</i>       | NA | NA | NA | FALSE |
| chr10:70979777  | 0,00017152 | 8,13E-02 | 0.116  | <i>HKDC1</i>        | -282    | promoter   | 0.173  | -0.336 | <i>SRGN</i>     | NA | NA | NA | TRUE  |
| chr16:32290010  | 0,00017305 | 8,16E-02 | -0.108 | <i>LOC390705</i>    | 11293   | intergenic | NA     | NA     | <i>NA</i>       | NA | NA | NA | FALSE |
| chr17:7758222   | 0,00017378 | 8,19E-02 | -0.11  | <i>TMEM88</i>       | -162    | promoter   | -0.13  | -0.394 | <i>SAT2</i>     | NA | NA | NA | FALSE |
| chr8:12401905   | 0,00017717 | 8,24E-02 | -0.109 | <i>AX747586</i>     | -25074  | intron     | NA     | 0.183  | <i>LONRF1</i>   | NA | NA | NA | FALSE |
| chr18:76003069  | 0,00017741 | 8,24E-02 | -0.225 | <i>SALL3</i>        | -737206 | intergenic | NA     | NA     | <i>NA</i>       | NA | NA | NA | FALSE |
| chr22:28200203  | 0,00017809 | 8,24E-02 | 0.104  | <i>MN1</i>          | -2718   | intergenic | -0.069 | -0.41  | <i>PITPNB</i>   | NA | NA | NA | FALSE |
| chr22:44529945  | 0,00017967 | 8,27E-02 | 0.146  | <i>TRNA_SeC</i>     | -16592  | intron     | NA     | 0.184  | <i>SAMM50</i>   | NA | NA | NA | FALSE |
| chr19:1047215   | 0,0001832  | 8,35E-02 | 0.233  | <i>ABCA7</i>        | 4556    | exon       | -0.202 | 0.391  | <i>CNN2</i>     | NA | NA | NA | FALSE |
| chr2:74643321   | 0,00018422 | 8,36E-02 | 0.139  | <i>DQ588163</i>     | 749     | promoter   | NA     | 0.266  | <i>MTHFD2</i>   | NA | NA | NA | FALSE |
| chr4:132896374  | 0,00018486 | 8,37E-02 | -0.133 | <i>BC131768</i>     | 247123  | intergenic | NA     | NA     | <i>NA</i>       | NA | NA | NA | TRUE  |
| chr21:46714738  | 0,0001848  | 8,37E-02 | -0.166 | <i>LOC642852</i>    | 6759    | exon       | NA     | -0.529 | <i>POFUT2</i>   | NA | NA | NA | FALSE |
| chr4:961402     | 0,00018569 | 8,37E-02 | 0.337  | <i>DGKQ</i>         | 5947    | exon       | 0.403  | 0.403  | <i>DGKQ</i>     | NA | NA | NA | FALSE |
| chr6:39798623   | 0,00018558 | 8,37E-02 | 0.133  | <i>DAAM2</i>        | -17719  | intron     | NA     | NA     | <i>NA</i>       | NA | NA | NA | FALSE |
| chr20:25847039  | 0,00018541 | 8,37E-02 | 0.105  | <i>FAM182B</i>      | 1748    | intron     | NA     | 0.204  | <i>ZNF337</i>   | NA | NA | NA | FALSE |
| chr2:150177111  | 0,00018618 | 8,37E-02 | 0.136  | <i>LYPD6</i>        | -9388   | intergenic | NA     | NA     | <i>NA</i>       | NA | NA | NA | FALSE |
| chr2:1817466    | 0,00018786 | 8,42E-02 | 0.269  | <i>MYT1L</i>        | 29193   | intron     | NA     | -0.695 | <i>PXDN</i>     | NA | NA | NA | FALSE |
| chr17:135250    | 0,00019037 | 8,48E-02 | 0.161  | <i>RPH3AL</i>       | 42121   | intron     | NA     | -0.178 | <i>FAM101B</i>  | NA | NA | NA | FALSE |
| chr7:1857068    | 0,00019087 | 8,49E-02 | -0.118 | <i>MIR4655</i>      | 26822   | intron     | NA     | -0.051 | <i>MAD1L1</i>   | NA | NA | NA | FALSE |
| chr18:60278825  | 0,00019831 | 8,68E-02 | 0.127  | <i>DKFZp451A185</i> | 29789   | intergenic | NA     | 0.238  | <i>ZCCHC2</i>   | NA | NA | NA | FALSE |
| chr8:94129854   | 0,00020777 | 8,91E-02 | -0.152 | <i>C8orf87</i>      | 49226   | intergenic | NA     | NA     | <i>NA</i>       | NA | NA | NA | FALSE |
| chr11:78614302  | 0,00021165 | 9,02E-02 | 0.139  | <i>ODZ4</i>         | 59097   | intron     | NA     | NA     | <i>NA</i>       | NA | NA | NA | FALSE |
| chr18:77398380  | 0,00022233 | 9,29E-02 | 0.167  | <i>CTDP1</i>        | -41421  | intergenic | 0.128  | 0.128  | <i>CTDP1</i>    | NA | NA | NA | FALSE |
| chr2:241484089  | 0,00022347 | 9,31E-02 | -0.227 | <i>ANKMY1</i>       | 13317   | intron     | -0.009 | -0.5   | <i>RNPEPL1</i>  | NA | NA | NA | FALSE |
| chr7:128580153  | 0,00022653 | 9,39E-02 | 0.167  | <i>IRF5</i>         | -619    | promoter   | -0.25  | -0.379 | <i>TNPO3</i>    | NA | NA | NA | FALSE |
| chr4:132897090  | 0,00022976 | 9,44E-02 | -0.11  | <i>BC131768</i>     | 247839  | intergenic | NA     | NA     | <i>NA</i>       | NA | NA | NA | FALSE |
| chr18:11972554  | 0,00023449 | 9,56E-02 | 0.119  | <i>IMPA2</i>        | -8873   | intergenic | 0.008  | -0.164 | <i>CHMP1B</i>   | NA | NA | NA | FALSE |
| chr11:400234    | 0,00023534 | 9,57E-02 | 0.12   | <i>PKP3</i>         | 6019    | intron     | NA     | -0.382 | <i>LRRCS6</i>   | NA | NA | NA | FALSE |
| chr10:134648734 | 0,00023591 | 9,58E-02 | 0.195  | <i>NKX6-2</i>       | -49198  | intron     | NA     | NA     | <i>NA</i>       | NA | NA | NA | FALSE |
| chr22:19751804  | 0,00024641 | 9,84E-02 | 0.124  | <i>TBX1</i>         | 7580    | exon       | NA     | 0.184  | <i>C22orf29</i> | NA | NA | NA | FALSE |
| chr2:232347976  | 0,00025181 | 9,92E-02 | 0.118  | <i>NCL</i>          | -18772  | intergenic | -0.26  | -0.26  | <i>NCL</i>      | NA | NA | NA | FALSE |
| chr15:79092841  | 0,00025189 | 9,92E-02 | 0.136  | <i>ADAMTS7</i>      | 10933   | exon       | NA     | -0.206 | <i>MORF4L1</i>  | NA | NA | NA | FALSE |
| chr19:5131447   | 0,00025155 | 9,92E-02 | -0.131 | <i>BC032415</i>     | 17556   | exon       | NA     | 0.319  | <i>ARRDC5</i>   | NA | NA | NA | FALSE |

**ESM Table 10. Differentially methylated CpGs identified in the CD8<sup>+</sup> T cell fraction between cases and controls prior to seroconversion**

| Methylation difference |          |          |                        | Nearest gene        |                          |              | Methylation-expression correlation analysis |                                                |                      | eQTM analysis |           |                 |                   |
|------------------------|----------|----------|------------------------|---------------------|--------------------------|--------------|---------------------------------------------|------------------------------------------------|----------------------|---------------|-----------|-----------------|-------------------|
| CpG site               | P value  | FDR      | Methylation difference | Nearest gene        | Distance to nearest gene | Genomic part | Nearest gene correlation, Spearman rho      | The highest observed correlation, Spearman rho | Correlating gene     | CpG name      | eQTM, FDR | Overall Z Score | CpG found on 450K |
| chr21:47285711         | 9,16E-22 | 4,78E-16 | -0.427                 | <i>PCBP3</i>        | 15838                    | intron       | -0.512                                      | -0.512                                         | <i>PCBP3</i>         | NA            | NA        | NA              | FALSE             |
| chr17:71322457         | 1,92E-11 | 2,28E-06 | 0.548                  | <i>CDC42EP4</i>     | -14315                   | intergenic   | -0.04                                       | 0.516                                          | <i>SLC39A11</i>      | NA            | NA        | NA              | FALSE             |
| chr7:3169674           | 3,00E-10 | 2,31E-05 | 0.162                  | <i>BC038729</i>     | 44614                    | intergenic   | NA                                          | 0.056                                          | <i>CARD11</i>        | NA            | NA        | NA              | FALSE             |
| chr19:12035022         | 3,10E-10 | 2,31E-05 | 0.115                  | <i>ZNF700</i>       | -861                     | promoter     | 0.195                                       | 0.364                                          | <i>ZNF439</i>        | NA            | NA        | NA              | FALSE             |
| chr14:45343058         | 6,22E-10 | 4,33E-05 | -0.259                 | <i>C14orf28</i>     | -23449                   | intergenic   | -0.065                                      | -0.163                                         | <i>FAM179B</i>       | NA            | NA        | NA              | FALSE             |
| chr7:3169658           | 4,11E-09 | 2,38E-04 | 0.218                  | <i>BC038729</i>     | 44630                    | intergenic   | NA                                          | 0.013                                          | <i>CARD11</i>        | NA            | NA        | NA              | FALSE             |
| chr21:47307753         | 6,48E-09 | 3,38E-04 | -0.129                 | <i>PCBP3</i>        | -8369                    | intron       | -0.501                                      | -0.501                                         | <i>PCBP3</i>         | NA            | NA        | NA              | FALSE             |
| chr14:65839593         | 7,98E-09 | 3,97E-04 | 0.155                  | <i>MIR4708</i>      | -37693                   | intergenic   | NA                                          | -0.118                                         | <i>FUT8</i>          | NA            | NA        | NA              | FALSE             |
| chr16:58534501         | 8,70E-09 | 4,13E-04 | 0.135                  | <i>NDRG4</i>        | 456                      | promoter     | NA                                          | 0.432                                          | <i>CNOT1</i>         | NA            | NA        | NA              | FALSE             |
| chr21:10597321         | 2,94E-08 | 1,09E-03 | -0.174                 | <i>AK311573</i>     | 122                      | promoter     | NA                                          | NA                                             | NA                   | NA            | NA        | NA              | FALSE             |
| chr9:137673887         | 3,92E-08 | 1,35E-03 | -0.303                 | <i>MIR3689C</i>     | 67329                    | intron       | NA                                          | -0.267                                         | <i>FCN1</i>          | NA            | NA        | NA              | FALSE             |
| chr18:60278825         | 4,29E-08 | 1,35E-03 | 0.11                   | <i>DKFZp451A185</i> | 29789                    | intergenic   | NA                                          | 0.273                                          | <i>ZCCHC2</i>        | NA            | NA        | NA              | FALSE             |
| chr4:56023764          | 8,68E-08 | 2,45E-03 | 0.168                  | <i>KDR</i>          | -32003                   | intergenic   | NA                                          | 0.1                                            | <i>TMEM165</i>       | NA            | NA        | NA              | FALSE             |
| chr19:37807937         | 1,40E-07 | 3,61E-03 | 0.127                  | <i>HKR1</i>         | -876                     | promoter     | 0.043                                       | -0.326                                         | <i>ZNF540</i>        | NA            | NA        | NA              | FALSE             |
| chr7:64516680          | 1,77E-07 | 4,40E-03 | -0.385                 | <i>CCT6P3</i>       | 17950                    | intron       | 0.002                                       | 0.09                                           | <i>ERV3-1</i>        | NA            | NA        | NA              | FALSE             |
| chr21:46714732         | 1,98E-07 | 4,59E-03 | -0.145                 | <i>LOC642852</i>    | 6753                     | exon         | NA                                          | -0.286                                         | <i>POFUT2</i>        | NA            | NA        | NA              | FALSE             |
| chr7:95008632          | 2,76E-07 | 6,00E-03 | 0.126                  | <i>PON1</i>         | 17056                    | intron       | NA                                          | 0.031                                          | <i>PON2</i>          | NA            | NA        | NA              | FALSE             |
| chr6:41720213          | 3,05E-07 | 6,25E-03 | 0.162                  | <i>PGC</i>          | -5075                    | intergenic   | NA                                          | -0.308                                         | <i>FRS3</i>          | NA            | NA        | NA              | FALSE             |
| chr16:8960779          | 3,16E-07 | 6,34E-03 | -0.155                 | <i>CARHSP1</i>      | 507                      | promoter     | 0.103                                       | -0.245                                         | <i>ABAT</i>          | NA            | NA        | NA              | FALSE             |
| chr1:145385344         | 3,51E-07 | 6,42E-03 | 0.134                  | <i>TRNA_Asn</i>     | -385                     | promoter     | NA                                          | -0.364                                         | <i>PIAS3</i>         | NA            | NA        | NA              | FALSE             |
| chr6:87680077          | 4,04E-07 | 6,81E-03 | -0.13                  | <i>HTR1E</i>        | 33055                    | intron       | NA                                          | 0.02                                           | <i>ZNF292</i>        | NA            | NA        | NA              | FALSE             |
| chr18:77454510         | 4,13E-07 | 6,85E-03 | -0.284                 | <i>CTDP1</i>        | 13082                    | intron       | -0.031                                      | -0.031                                         | <i>CTDP1</i>         | NA            | NA        | NA              | FALSE             |
| chr14:24801107         | 4,51E-07 | 7,14E-03 | -0.142                 | <i>ADCY4</i>        | 3171                     | exon         | -0.049                                      | 0.357                                          | <i>TINF2</i>         | NA            | NA        | NA              | FALSE             |
| chr16:58534596         | 4,49E-07 | 7,14E-03 | 0.143                  | <i>NDRG4</i>        | 551                      | promoter     | NA                                          | -0.299                                         | <i>GINS3</i>         | NA            | NA        | NA              | FALSE             |
| chr11:42895488         | 5,21E-07 | 7,77E-03 | 0.289                  | <i>HNRNP KP3</i>    | 395432                   | intergenic   | NA                                          | NA                                             | NA                   | NA            | NA        | NA              | FALSE             |
| chr6:53069739          | 5,61E-07 | 8,02E-03 | -0.185                 | <i>GCM1</i>         | -56116                   | intergenic   | NA                                          | 0.388                                          | <i>RN7SK</i>         | NA            | NA        | NA              | FALSE             |
| chr13:20528307         | 7,23E-07 | 9,93E-03 | -0.357                 | <i>ZMYM2</i>        | -4503                    | intergenic   | -0.006                                      | 0.243                                          | <i>PSPC1</i>         | NA            | NA        | NA              | FALSE             |
| chr21:47307758         | 8,33E-07 | 1,07E-02 | -0.118                 | <i>PCBP3</i>        | -8364                    | intron       | -0.421                                      | -0.421                                         | <i>PCBP3</i>         | NA            | NA        | NA              | FALSE             |
| chr22:50473537         | 8,97E-07 | 1,13E-02 | -0.105                 | <i>IL17REL</i>      | -22483                   | intergenic   | NA                                          | -0.372                                         | <i>RP3-402G11.25</i> | NA            | NA        | NA              | FALSE             |
| chr4:132897258         | 9,74E-07 | 1,16E-02 | -0.11                  | <i>BC131768</i>     | 248007                   | intergenic   | NA                                          | NA                                             | NA                   | NA            | NA        | NA              | FALSE             |
| chr4:8890318           | 9,90E-07 | 1,16E-02 | 0.121                  | <i>HMX1</i>         | -16776                   | intergenic   | NA                                          | NA                                             | NA                   | NA            | NA        | NA              | FALSE             |
| chr5:270983            | 1,12E-06 | 1,27E-02 | 0.159                  | <i>PDCD6</i>        | -753                     | promoter     | 0.081                                       | 0.424                                          | <i>CTD-2083E4.4</i>  | NA            | NA        | NA              | FALSE             |
| chr5:80529135          | 1,30E-06 | 1,37E-02 | -0.195                 | <i>CKMT2</i>        | -4                       | promoter     | NA                                          | 0.318                                          | <i>ZCCHC9</i>        | NA            | NA        | NA              | TRUE              |
| chr11:3662811          | 1,32E-06 | 1,38E-02 | -0.149                 | <i>ART5</i>         | 675                      | promoter     | NA                                          | -0.314                                         | <i>PGAP2</i>         | NA            | NA        | NA              | FALSE             |
| chr4:3835991           | 1,38E-06 | 1,41E-02 | -0.195                 | <i>ADRA2C</i>       | 67697                    | intergenic   | NA                                          | NA                                             | NA                   | NA            | NA        | NA              | FALSE             |
| chr1:12184835          | 1,55E-06 | 1,44E-02 | -0.23                  | <i>TNFRSF8</i>      | -1123                    | intron       | NA                                          | -0.192                                         | <i>TNFRSF1B</i>      | NA            | NA        | NA              | FALSE             |
| chr2:155146645         | 1,55E-06 | 1,44E-02 | 0.149                  | <i>GALNT13</i>      | 44322                    | intron       | NA                                          | NA                                             | NA                   | NA            | NA        | NA              | FALSE             |
| chr17:80272875         | 1,53E-06 | 1,44E-02 | 0.168                  | <i>CD7</i>          | 2606                     | exon         | -0.13                                       | -0.187                                         | <i>SLC16A3</i>       | NA            | NA        | NA              | FALSE             |
| chr4:39569133          | 1,58E-06 | 1,45E-02 | -0.409                 | <i>SMIM14</i>       | 16446                    | intron       | NA                                          | 0.14                                           | <i>RFC1</i>          | NA            | NA        | NA              | FALSE             |

|                 |          |          |        |              |        |            |        |        |              |    |    |    |       |
|-----------------|----------|----------|--------|--------------|--------|------------|--------|--------|--------------|----|----|----|-------|
| chr19:53511567  | 1,78E-06 | 1,56E-02 | -0.106 | AK127846     | 804    | promoter   | NA     | -0.307 | ZNF600       | NA | NA | NA | FALSE |
| chr22:39633525  | 1,90E-06 | 1,62E-02 | 0.114  | PDGFB        | 3390   | intron     | NA     | -0.484 | CBX7         | NA | NA | NA | FALSE |
| chr11:55640460  | 1,99E-06 | 1,63E-02 | -0.182 | TRIM51       | -10313 | intergenic | NA     | NA     | NA           | NA | NA | NA | FALSE |
| chr14:34269955  | 2,18E-06 | 1,75E-02 | -0.146 | EGLN3        | 150078 | exon       | NA     | NA     | NA           | NA | NA | NA | FALSE |
| chr6:44243633   | 2,38E-06 | 1,84E-02 | 0.202  | SPATS1       | 2832   | intron     | NA     | -0.153 | TMEM63B      | NA | NA | NA | FALSE |
| chr8:144660722  | 2,53E-06 | 1,87E-02 | 0.142  | NAPRT1       | -210   | promoter   | -0.543 | -0.543 | NAPRT1       | NA | NA | NA | FALSE |
| chr19:37807898  | 2,54E-06 | 1,87E-02 | 0.107  | HKR1         | -915   | promoter   | 0.036  | -0.239 | ZNF540       | NA | NA | NA | FALSE |
| chr20:35001212  | 2,50E-06 | 1,87E-02 | 0.103  | DLGAP4       | 5766   | intron     | -0.04  | 0.34   | C20orf24     | NA | NA | NA | FALSE |
| chr19:42021679  | 2,96E-06 | 2,04E-02 | -0.281 | LOC100505495 | -15126 | intergenic | NA     | 0.494  | ATP5SL       | NA | NA | NA | FALSE |
| chr22:49447970  | 3,10E-06 | 2,06E-02 | 0.247  | LOC100128946 | 185390 | intergenic | NA     | NA     | NA           | NA | NA | NA | FALSE |
| chr9:137445381  | 3,51E-06 | 2,29E-02 | -0.134 | COL5A1       | -88270 | intergenic | NA     | 0.087  | RXRA         | NA | NA | NA | FALSE |
| chr20:48404038  | 3,71E-06 | 2,36E-02 | -0.161 | SLC9A8       | -25212 | intergenic | -0.007 | 0.289  | SNAI1        | NA | NA | NA | FALSE |
| chr4:81110000   | 3,78E-06 | 2,38E-02 | -0.229 | PRDM8        | 3578   | intron     | 0.039  | 0.039  | PRDM8        | NA | NA | NA | FALSE |
| chr1:145385336  | 3,90E-06 | 2,42E-02 | 0.13   | TRNA_Asn     | -393   | promoter   | NA     | -0.444 | PIAS3        | NA | NA | NA | FALSE |
| chr5:80529187   | 4,21E-06 | 2,51E-02 | -0.115 | CKMT2        | 50     | promoter   | NA     | 0.409  | ZCCHC9       | NA | NA | NA | TRUE  |
| chr12:11812633  | 5,18E-06 | 2,90E-02 | -0.147 | ETV6         | 9847   | intron     | -0.471 | -0.471 | ETV6         | NA | NA | NA | FALSE |
| chr16:21373131  | 5,22E-06 | 2,90E-02 | 0.166  | SNX29P1      | 12449  | intron     | NA     | -0.144 | NPIP3        | NA | NA | NA | FALSE |
| chr19:23076831  | 5,21E-06 | 2,90E-02 | 0.133  | ZNF728       | 93375  | intergenic | NA     | NA     | NA           | NA | NA | NA | FALSE |
| chr19:23076811  | 5,31E-06 | 2,92E-02 | 0.118  | ZNF728       | 93395  | intergenic | NA     | NA     | NA           | NA | NA | NA | FALSE |
| chr8:1950591    | 5,43E-06 | 2,97E-02 | 0.201  | KBTBD11      | 1234   | exon       | NA     | 0.376  | CTD-2336O2.1 | NA | NA | NA | FALSE |
| chr4:129135369  | 5,83E-06 | 3,12E-02 | 0.294  | LARP1B       | 14777  | intron     | 0.119  | -0.416 | PGRMC2       | NA | NA | NA | FALSE |
| chr20:47013316  | 6,51E-06 | 3,40E-02 | -0.219 | LINC00494    | 18928  | intergenic | NA     | NA     | NA           | NA | NA | NA | FALSE |
| chr10:103885908 | 7,51E-06 | 3,73E-02 | 0.127  | LDB1         | -5699  | intergenic | -0.016 | -0.357 | HPS6         | NA | NA | NA | FALSE |
| chr16:1122053   | 7,70E-06 | 3,77E-02 | 0.111  | SSTR5        | -703   | promoter   | NA     | -0.19  | CACNA1H      | NA | NA | NA | FALSE |
| chr1:19110630   | 8,46E-06 | 4,01E-02 | 0.176  | TAS1R2       | 75526  | intergenic | NA     | 0.06   | FFO2         | NA | NA | NA | FALSE |
| chr16:1122013   | 8,52E-06 | 4,01E-02 | 0.105  | SSTR5        | -743   | promoter   | NA     | -0.187 | UBE2I        | NA | NA | NA | FALSE |
| chr22:50473370  | 8,70E-06 | 4,03E-02 | -0.13  | IL17REL      | -22316 | intergenic | NA     | 0.333  | CITF22-1A6.3 | NA | NA | NA | FALSE |
| chr11:2121703   | 8,77E-06 | 4,04E-02 | 0.142  | INS-IGF2     | 33202  | intergenic | NA     | -0.416 | TSPAN32      | NA | NA | NA | FALSE |
| chr9:140395291  | 8,94E-06 | 4,09E-02 | 0.176  | PNPLA7       | -13212 | intron     | 0.152  | -0.257 | NELFB        | NA | NA | NA | FALSE |
| chr9:89416194   | 9,31E-06 | 4,17E-02 | 0.115  | GAS1         | 145911 | intergenic | NA     | NA     | NA           | NA | NA | NA | FALSE |
| chr5:177921624  | 9,68E-06 | 4,21E-02 | -0.368 | COL23A1      | 95933  | intron     | NA     | 0.274  | CLK4         | NA | NA | NA | FALSE |
| chr12:65285275  | 9,91E-06 | 4,24E-02 | -0.32  | FLJ41278     | 7723   | intron     | NA     | -0.017 | GNS          | NA | NA | NA | FALSE |
| chr7:155211164  | 1,04E-05 | 4,34E-02 | -0.198 | BC150495     | 36395  | intergenic | NA     | 0.411  | RBM33        | NA | NA | NA | FALSE |
| chr9:137673998  | 1,06E-05 | 4,41E-02 | -0.352 | MIR3689C     | 67218  | intron     | NA     | -0.017 | FCN1         | NA | NA | NA | FALSE |
| chr2:242055173  | 1,12E-05 | 4,59E-02 | -0.399 | MTERFD2      | -13427 | intron     | 0.082  | 0.319  | PASK         | NA | NA | NA | FALSE |
| chr16:8960535   | 1,17E-05 | 4,76E-02 | -0.152 | CARHSP1      | 751    | promoter   | -0.023 | -0.253 | ABAT         | NA | NA | NA | FALSE |
| chr1:121143463  | 1,21E-05 | 4,80E-02 | -0.18  | SRGAP2D      | 36313  | intergenic | NA     | -0.107 | NA           | NA | NA | NA | FALSE |
| chr17:21273093  | 1,23E-05 | 4,80E-02 | -0.12  | KCNJ12       | -6606  | intergenic | NA     | 0.206  | TMEM11       | NA | NA | NA | FALSE |
| chr3:194705950  | 1,35E-05 | 4,93E-02 | -0.18  | XXYL1        | 136975 | intergenic | -0.145 | NA     | NA           | NA | NA | NA | FALSE |
| chr16:32290010  | 1,42E-05 | 5,14E-02 | -0.127 | LOC390705    | 11293  | intergenic | NA     | NA     | NA           | NA | NA | NA | FALSE |
| chr4:129135308  | 1,49E-05 | 5,26E-02 | 0.327  | LARP1B       | 14716  | intron     | 0.07   | -0.373 | PGRMC2       | NA | NA | NA | FALSE |
| chr8:52321396   | 1,49E-05 | 5,26E-02 | -0.196 | PXDNL        | 726    | promoter   | NA     | NA     | NA           | NA | NA | NA | FALSE |
| chr4:56023753   | 1,57E-05 | 5,34E-02 | 0.163  | KDR          | -31992 | intergenic | NA     | -0.088 | TMEM165      | NA | NA | NA | FALSE |
| chr1:55766588   | 1,64E-05 | 5,43E-02 | -0.429 | MIR4422      | 75276  | intergenic | NA     | 0.026  | USP24        | NA | NA | NA | FALSE |
| chr7:99067371   | 1,67E-05 | 5,47E-02 | 0.189  | TRNA_Trp     | 66     | promoter   | NA     | -0.173 | ZKSCAN5      | NA | NA | NA | FALSE |
| chr10:70776965  | 1,68E-05 | 5,47E-02 | 0.295  | KIAA1279     | 28490  | intergenic | -0.029 | -0.208 | VPS26A       | NA | NA | NA | FALSE |
| chr14:103603372 | 1,70E-05 | 5,50E-02 | -0.375 | TNFAIP2      | 4287   | exon       | -0.31  | -0.31  | TNFAIP2      | NA | NA | NA | FALSE |

|                 |          |          |        |              |         |            |        |        |               |    |    |    |       |
|-----------------|----------|----------|--------|--------------|---------|------------|--------|--------|---------------|----|----|----|-------|
| chr19:53511717  | 1,75E-05 | 5,59E-02 | -0.123 | AK127846     | 954     | promoter   | NA     | -0.47  | NDUFV2P1      | NA | NA | NA | FALSE |
| chr9:137673849  | 1,80E-05 | 5,65E-02 | -0.289 | MIR3689C     | 67367   | intron     | NA     | -0.269 | FCN1          | NA | NA | NA | FALSE |
| chr4:1522024    | 1,81E-05 | 5,67E-02 | 0.235  | AX748388     | 55943   | intergenic | NA     | 0.396  | TMEM129       | NA | NA | NA | FALSE |
| chr21:19130093  | 1,87E-05 | 5,80E-02 | 0.181  | C21orf91-OT1 | 34734   | intergenic | NA     | -0.177 | BTG3          | NA | NA | NA | FALSE |
| chr5:51168      | 1,90E-05 | 5,88E-02 | -0.152 | PLEKHG4B     | -89205  | intergenic | NA     | 0.315  | SDHA          | NA | NA | NA | FALSE |
| chr19:37807906  | 2,01E-05 | 6,05E-02 | 0.143  | HKR1         | -907    | promoter   | 0.069  | -0.267 | ZNF540        | NA | NA | NA | FALSE |
| chr16:14637963  | 2,05E-05 | 6,06E-02 | -0.34  | PARN         | 86166   | intron     | -0.183 | -0.183 | PARN          | NA | NA | NA | FALSE |
| chr4:25828446   | 2,13E-05 | 6,19E-02 | 0.161  | SEL1L3       | -22073  | intron     | -0.26  | -0.26  | SEL1L3        | NA | NA | NA | FALSE |
| chr4:81111507   | 2,15E-05 | 6,19E-02 | -0.17  | PRDM8        | 5085    | intron     | 0.142  | 0.142  | PRDM8         | NA | NA | NA | FALSE |
| chr3:49570603   | 2,21E-05 | 6,26E-02 | 0.115  | BSN-AS2      | 21197   | exon       | NA     | -0.226 | RHOA          | NA | NA | NA | FALSE |
| chr10:105058506 | 2,33E-05 | 6,45E-02 | -0.21  | INA          | 21588   | intergenic | NA     | -0.103 | PDCD11        | NA | NA | NA | FALSE |
| chr16:9005505   | 2,38E-05 | 6,55E-02 | -0.217 | USP7         | 25039   | intron     | 0.045  | 0.313  | RP11-47311.9  | NA | NA | NA | FALSE |
| chr19:49000956  | 2,39E-05 | 6,55E-02 | 0.111  | LMTK3        | 15491   | exon       | 0.006  | -0.325 | CA11          | NA | NA | NA | FALSE |
| chr6:163570410  | 2,41E-05 | 6,56E-02 | -0.202 | AK296276     | 42431   | intron     | NA     | NA     | NA            | NA | NA | NA | FALSE |
| chr4:56023797   | 2,43E-05 | 6,57E-02 | 0.122  | KDR          | -32036  | intergenic | NA     | -0.129 | TMEM165       | NA | NA | NA | FALSE |
| chr20:61642359  | 2,47E-05 | 6,65E-02 | 0.17   | LOC63930     | 1626    | intron     | NA     | -0.414 | YTHDF1        | NA | NA | NA | FALSE |
| chr13:108449714 | 2,48E-05 | 6,66E-02 | 0.142  | BC043519     | 38086   | intron     | NA     | NA     | NA            | NA | NA | NA | FALSE |
| chr2:3454241    | 2,51E-05 | 6,73E-02 | 0.155  | TRAPPC12     | 62852   | intron     | 0.039  | 0.303  | TSSC1         | NA | NA | NA | FALSE |
| chr4:81109946   | 2,61E-05 | 6,97E-02 | -0.185 | PRDM8        | 3524    | intron     | 0.067  | 0.067  | PRDM8         | NA | NA | NA | FALSE |
| chr8:144788313  | 2,75E-05 | 7,21E-02 | 0.108  | CCDC166      | 1967    | intron     | NA     | -0.354 | BREA2         | NA | NA | NA | FALSE |
| chr2:237085537  | 2,84E-05 | 7,31E-02 | 0.156  | GBX2         | -8886   | intergenic | NA     | NA     | NA            | NA | NA | NA | FALSE |
| chr6:2972312    | 2,88E-05 | 7,31E-02 | -0.127 | SERPINB6     | 88      | promoter   | 0.384  | 0.384  | SERPINB6      | NA | NA | NA | FALSE |
| chr22:50472562  | 2,90E-05 | 7,33E-02 | -0.171 | IL17REL      | -21508  | intergenic | NA     | -0.227 | RP3-402G11.25 | NA | NA | NA | FALSE |
| chr15:29684327  | 3,05E-05 | 7,55E-02 | 0.147  | NDNL2        | -122308 | intron     | -0.093 | -0.093 | NDNL2         | NA | NA | NA | FALSE |
| chr4:56023751   | 3,15E-05 | 7,64E-02 | 0.195  | KDR          | -31990  | intergenic | NA     | -0.08  | TMEM165       | NA | NA | NA | TRUE  |
| chr7:151137499  | 3,17E-05 | 7,64E-02 | -0.172 | CRYGN        | -401    | promoter   | NA     | -0.28  | WDR86-AS1     | NA | NA | NA | FALSE |
| chr4:1522095    | 3,38E-05 | 7,82E-02 | 0.295  | AX748388     | 55872   | intergenic | NA     | 0.487  | UVSSA         | NA | NA | NA | FALSE |
| chr4:8891755    | 3,41E-05 | 7,85E-02 | 0.144  | HMX1         | -18213  | intergenic | NA     | NA     | NA            | NA | NA | NA | FALSE |
| chr6:53069733   | 3,47E-05 | 7,95E-02 | -0.208 | GCM1         | -56110  | intergenic | NA     | 0.45   | RN7SK         | NA | NA | NA | FALSE |
| chr8:1950540    | 3,59E-05 | 8,08E-02 | 0.145  | KBTD11       | 1183    | exon       | NA     | 0.171  | CLN8          | NA | NA | NA | FALSE |
| chr15:101661802 | 3,57E-05 | 8,08E-02 | -0.215 | CHSY1        | 66465   | intergenic | 0.165  | 0.258  | VIMP          | NA | NA | NA | FALSE |
| chr4:132897056  | 3,81E-05 | 8,34E-02 | -0.275 | BC131768     | 247805  | intergenic | NA     | NA     | NA            | NA | NA | NA | FALSE |
| chr10:134597708 | 3,86E-05 | 8,40E-02 | 0.122  | NKX6-2       | 1830    | intergenic | NA     | 0.019  | INPP5A        | NA | NA | NA | FALSE |
| chr2:129160452  | 3,92E-05 | 8,47E-02 | -0.192 | HS6ST1       | -84282  | intergenic | -0.128 | -0.128 | HS6ST1        | NA | NA | NA | FALSE |
| chr5:126111684  | 3,95E-05 | 8,48E-02 | -0.146 | LMNB1        | -631    | promoter   | -0.153 | 0.249  | PHAX          | NA | NA | NA | FALSE |
| chr16:121845    | 3,95E-05 | 8,48E-02 | -0.31  | RHBDF1       | 785     | promoter   | NA     | -0.426 | SNRNP25       | NA | NA | NA | FALSE |
| chr20:3733249   | 4,06E-05 | 8,59E-02 | -0.172 | C20orf27     | 15204   | exon       | 0.152  | 0.372  | AP5S1         | NA | NA | NA | FALSE |
| chr16:433927    | 4,30E-05 | 8,77E-02 | -0.204 | LOC100134368 | 1688    | intron     | NA     | -0.484 | TMEM8A        | NA | NA | NA | FALSE |
| chr11:96144166  | 4,37E-05 | 8,77E-02 | -0.224 | JRKL         | 21010   | intergenic | NA     | -0.169 | CCDC82        | NA | NA | NA | FALSE |
| chr16:8960813   | 4,40E-05 | 8,77E-02 | -0.15  | CARHSP1      | 473     | promoter   | 0.002  | -0.196 | NA            | NA | NA | NA | FALSE |
| chr3:96205331   | 4,44E-05 | 8,80E-02 | -0.23  | Mir_548      | -179709 | intergenic | NA     | NA     | NA            | NA | NA | NA | FALSE |
| chr7:155211169  | 4,45E-05 | 8,81E-02 | -0.202 | BC150495     | 36400   | intergenic | NA     | 0.26   | INSIG1        | NA | NA | NA | FALSE |
| chr22:49588344  | 4,61E-05 | 8,95E-02 | -0.155 | LOC100128946 | 325764  | intergenic | NA     | NA     | NA            | NA | NA | NA | FALSE |
| chr3:194705962  | 4,69E-05 | 9,01E-02 | -0.135 | XXYL1        | 136963  | intergenic | 0.183  | NA     | NA            | NA | NA | NA | FALSE |
| chr19:1047251   | 4,70E-05 | 9,01E-02 | 0.177  | ABCA7        | 4592    | exon       | -0.087 | 0.3    | CIRBP-AS1     | NA | NA | NA | FALSE |
| chr3:128151227  | 4,81E-05 | 9,11E-02 | -0.171 | DNAJB8       | 30862   | intergenic | NA     | 0.346  | RPN1          | NA | NA | NA | FALSE |
| chr11:55640449  | 4,83E-05 | 9,13E-02 | -0.148 | TRIM51       | -10324  | intergenic | NA     | NA     | NA            | NA | NA | NA | FALSE |

|                 |          |          |        |                  |        |            |        |        |                 |    |    |    |       |
|-----------------|----------|----------|--------|------------------|--------|------------|--------|--------|-----------------|----|----|----|-------|
| chr14:34269943  | 4,86E-05 | 9,15E-02 | -0.193 | <i>EGLN3</i>     | 150090 | exon       | NA     | NA     | <i>NA</i>       | NA | NA | NA | FALSE |
| chr10:114335940 | 4,93E-05 | 9,20E-02 | 0.165  | <i>MIR4295</i>   | -57989 | intron     | NA     | 0.205  | <i>VTI1A</i>    | NA | NA | NA | FALSE |
| chr4:123286282  | 5,02E-05 | 9,30E-02 | -0.161 | <i>ADAD1</i>     | -13839 | intergenic | NA     | 0.175  | <i>KIAA1109</i> | NA | NA | NA | FALSE |
| chr17:72916411  | 5,06E-05 | 9,32E-02 | 0.114  | <i>USH1G</i>     | 2941   | exon       | NA     | 0.339  | <i>KCTD2</i>    | NA | NA | NA | FALSE |
| chr6:117536160  | 5,15E-05 | 9,37E-02 | -0.351 | <i>VGLL2</i>     | -50561 | intergenic | NA     | NA     | <i>NA</i>       | NA | NA | NA | FALSE |
| chr19:40726376  | 5,38E-05 | 9,64E-02 | 0.175  | <i>TTC9B</i>     | -2071  | intergenic | NA     | 0.325  | <i>MAP3K10</i>  | NA | NA | NA | FALSE |
| chr20:2690396   | 5,50E-05 | 9,77E-02 | -0.187 | <i>EBF4</i>      | 16874  | intron     | -0.152 | 0.488  | <i>PCED1A</i>   | NA | NA | NA | FALSE |
| chr3:13275522   | 5,53E-05 | 9,80E-02 | -0.155 | <i>NUP210</i>    | 120673 | intergenic | -0.13  | 0.176  | <i>HDAC11</i>   | NA | NA | NA | FALSE |
| chr9:137674085  | 5,57E-05 | 9,85E-02 | -0.13  | <i>MIR3689C</i>  | 67131  | intron     | NA     | -0.425 | <i>FCN1</i>     | NA | NA | NA | FALSE |
| chr20:4180020   | 5,73E-05 | 9,94E-02 | -0.178 | <i>LOC728228</i> | 6285   | intergenic | NA     | 0.301  | <i>RNF24</i>    | NA | NA | NA | FALSE |
| chr21:47307825  | 5,84E-05 | 9,98E-02 | -0.142 | <i>PCBP3</i>     | -8297  | intron     | -0.534 | -0.534 | <i>PCBP3</i>    | NA | NA | NA | FALSE |



**ESM Table 11. Differentially methylated CpGs identified in the CD4<sup>+</sup>CD8<sup>+</sup> cell fraction between cases and controls prior to seroconversion**

| Methylation difference |          |          |                        | Nearest gene        |                          |              | Methylation-expression correlation analysis |                                                |                       | eQTM analysis |           |                 |                   |
|------------------------|----------|----------|------------------------|---------------------|--------------------------|--------------|---------------------------------------------|------------------------------------------------|-----------------------|---------------|-----------|-----------------|-------------------|
| CpG site               | P value  | FDR      | Methylation difference | Nearest gene        | Distance to nearest gene | Genomic part | Nearest gene correlation, Spearman rho      | The highest observed correlation, Spearman rho | Correlating gene      | CpG name      | eQTM, FDR | Overall Z Score | CpG found on 450K |
| chr11:134709660        | 5,41E-17 | 4,72E-11 | 0.228                  | <i>AK125040</i>     | 103823                   | intergenic   | NA                                          | NA                                             | <i>NA</i>             | NA            | NA        | NA              | FALSE             |
| chr2:113192534         | 6,45E-13 | 1,87E-07 | 0.132                  | <i>RGPD8</i>        | -473                     | promoter     | 0.014                                       | 0.253                                          | <i>TTL</i>            | NA            | NA        | NA              | FALSE             |
| chr8:144788521         | 1,09E-12 | 2,37E-07 | 0.18                   | <i>CCDC166</i>      | 1759                     | intron       | NA                                          | 0.328                                          | <i>ZC3H3</i>          | NA            | NA        | NA              | FALSE             |
| chr3:194706028         | 9,52E-12 | 1,38E-06 | -0.135                 | <i>XXYL1</i>        | 136897                   | intergenic   | -0.263                                      | NA                                             | <i>NA</i>             | NA            | NA        | NA              | FALSE             |
| chr6:163570666         | 5,53E-10 | 4,25E-05 | -0.219                 | <i>AK296276</i>     | 42175                    | intron       | NA                                          | NA                                             | <i>NA</i>             | NA            | NA        | NA              | FALSE             |
| chr9:136063981         | 4,89E-10 | 4,25E-05 | -0.173                 | <i>OBP2B</i>        | 20648                    | intergenic   | NA                                          | 0.226                                          | <i>SURF2</i>          | NA            | NA        | NA              | FALSE             |
| chr2:176121849         | 6,44E-10 | 4,32E-05 | -0.276                 | <i>ATP5G3</i>       | -75360                   | intergenic   | 0.068                                       | 0.068                                          | <i>ATP5G3</i>         | NA            | NA        | NA              | FALSE             |
| chr1:3811367           | 9,27E-10 | 5,77E-05 | 0.238                  | <i>C1orf174</i>     | 5491                     | intron       | 0.116                                       | 0.558                                          | <i>DFFB</i>           | NA            | NA        | NA              | FALSE             |
| chr22:49447907         | 1,85E-09 | 1,08E-04 | 0.263                  | <i>LOC100128946</i> | 185327                   | intergenic   | NA                                          | NA                                             | <i>NA</i>             | NA            | NA        | NA              | FALSE             |
| chr10:123909315        | 3,11E-09 | 1,70E-04 | 0.113                  | <i>TACC2</i>        | -13790                   | intron       | NA                                          | -0.108                                         | <i>PLEKHA1</i>        | NA            | NA        | NA              | FALSE             |
| chr3:194705954         | 4,26E-09 | 2,19E-04 | -0.133                 | <i>XXYL1</i>        | 136971                   | intergenic   | -0.122                                      | NA                                             | <i>NA</i>             | NA            | NA        | NA              | TRUE              |
| chr11:65359968         | 6,92E-09 | 3,14E-04 | -0.32                  | <i>KCNK7</i>        | 3500                     | exon         | 0.129                                       | -0.545                                         | <i>LTBP3</i>          | NA            | NA        | NA              | FALSE             |
| chr9:136075476         | 1,36E-08 | 5,18E-04 | 0.191                  | <i>OBP2B</i>        | 9153                     | intergenic   | NA                                          | 0.31                                           | <i>SURF1</i>          | NA            | NA        | NA              | FALSE             |
| chr9:137674085         | 1,43E-08 | 5,18E-04 | -0.131                 | <i>MIR3689C</i>     | 67131                    | intron       | NA                                          | 0.297                                          | <i>FCN1</i>           | NA            | NA        | NA              | FALSE             |
| chr22:49447894         | 1,99E-08 | 6,67E-04 | 0.217                  | <i>LOC100128946</i> | 185314                   | intergenic   | NA                                          | NA                                             | <i>NA</i>             | NA            | NA        | NA              | FALSE             |
| chr4:8890312           | 2,46E-08 | 7,96E-04 | 0.177                  | <i>HMX1</i>         | -16770                   | intergenic   | NA                                          | NA                                             | <i>NA</i>             | NA            | NA        | NA              | FALSE             |
| chr11:122427613        | 2,84E-08 | 8,84E-04 | -0.252                 | <i>TRNA_Lys</i>     | -3042                    | intergenic   | NA                                          | -0.117                                         | <i>UBASH3B</i>        | NA            | NA        | NA              | FALSE             |
| chr10:1416833          | 4,08E-08 | 1,19E-03 | -0.242                 | <i>ADARB2-AS1</i>   | -151992                  | intron       | NA                                          | NA                                             | <i>NA</i>             | NA            | NA        | NA              | FALSE             |
| chr11:122427583        | 4,40E-08 | 1,20E-03 | -0.236                 | <i>TRNA_Lys</i>     | -3072                    | intergenic   | NA                                          | -0.156                                         | <i>UBASH3B</i>        | NA            | NA        | NA              | FALSE             |
| chr11:122427610        | 5,13E-08 | 1,32E-03 | -0.217                 | <i>TRNA_Lys</i>     | -3045                    | intergenic   | NA                                          | -0.167                                         | <i>UBASH3B</i>        | NA            | NA        | NA              | FALSE             |
| chr16:32289963         | 6,46E-08 | 1,61E-03 | -0.142                 | <i>LOC390705</i>    | 11340                    | intergenic   | NA                                          | NA                                             | <i>NA</i>             | NA            | NA        | NA              | FALSE             |
| chr11:122427556        | 8,65E-08 | 1,88E-03 | -0.232                 | <i>TRNA_Lys</i>     | -3099                    | intergenic   | NA                                          | -0.075                                         | <i>UBASH3B</i>        | NA            | NA        | NA              | FALSE             |
| chr11:122427599        | 8,82E-08 | 1,88E-03 | -0.246                 | <i>TRNA_Lys</i>     | -3056                    | intergenic   | NA                                          | -0.177                                         | <i>UBASH3B</i>        | NA            | NA        | NA              | FALSE             |
| chr2:113192563         | 9,66E-08 | 2,01E-03 | 0.146                  | <i>RGPD8</i>        | -502                     | promoter     | 0.024                                       | 0.336                                          | <i>TTL</i>            | NA            | NA        | NA              | FALSE             |
| chr2:198768428         | 1,17E-07 | 2,33E-03 | 0.47                   | <i>PLCL1</i>        | 99004                    | intron       | 0.398                                       | 0.398                                          | <i>PLCL1</i>          | NA            | NA        | NA              | FALSE             |
| chr12:132699571        | 1,24E-07 | 2,40E-03 | -0.12                  | <i>GALNT9</i>       | -8999                    | intron       | NA                                          | 0.416                                          | <i>NOC4L</i>          | NA            | NA        | NA              | FALSE             |
| chr1:43425490          | 1,92E-07 | 3,22E-03 | 0.142                  | <i>SLC2A1</i>       | -644                     | promoter     | -0.129                                      | 0.264                                          | <i>ERMAP</i>          | NA            | NA        | NA              | FALSE             |
| chr2:27038368          | 1,99E-07 | 3,27E-03 | -0.21                  | <i>CENPA</i>        | 29488                    | intergenic   | NA                                          | 0.365                                          | <i>TMEM214</i>        | NA            | NA        | NA              | FALSE             |
| chr11:132662819        | 2,14E-07 | 3,46E-03 | -0.229                 | <i>OPCML</i>        | 150219                   | intron       | NA                                          | NA                                             | <i>NA</i>             | NA            | NA        | NA              | FALSE             |
| chr11:55640232         | 3,37E-07 | 5,16E-03 | -0.197                 | <i>TRIM51</i>       | -10541                   | intergenic   | NA                                          | NA                                             | <i>NA</i>             | NA            | NA        | NA              | FALSE             |
| chr6:109705383         | 3,55E-07 | 5,34E-03 | -0.238                 | <i>CD164</i>        | -1622                    | intergenic   | 0.07                                        | -0.377                                         | <i>RP11-425D10.10</i> | NA            | NA        | NA              | FALSE             |
| chr14:65542732         | 4,27E-07 | 5,91E-03 | 0.15                   | <i>LOC100506321</i> | -13904                   | intron       | NA                                          | -0.401                                         | <i>RP11-840I19.3</i>  | NA            | NA        | NA              | FALSE             |
| chr10:80504266         | 4,87E-07 | 6,44E-03 | 0.133                  | <i>AX747983</i>     | 259295                   | intergenic   | NA                                          | NA                                             | <i>NA</i>             | NA            | NA        | NA              | FALSE             |
| chr19:17930969         | 4,95E-07 | 6,44E-03 | 0.364                  | <i>INSL3</i>        | 1415                     | intron       | 0.213                                       | 0.319                                          | <i>JAK3</i>           | NA            | NA        | NA              | FALSE             |
| chr2:27038339          | 5,31E-07 | 6,68E-03 | -0.217                 | <i>CENPA</i>        | 29459                    | intergenic   | NA                                          | 0.326                                          | <i>TMEM214</i>        | NA            | NA        | NA              | FALSE             |
| chr5:1064074           | 5,81E-07 | 6,71E-03 | 0.122                  | <i>MIR4635</i>      | -986                     | promoter     | NA                                          | 0.227                                          | <i>BRD9</i>           | NA            | NA        | NA              | FALSE             |
| chr16:50876453         | 6,11E-07 | 6,71E-03 | 0.122                  | <i>CYLD</i>         | 54758                    | intergenic   | 0.029                                       | -0.142                                         | <i>SNX20</i>          | NA            | NA        | NA              | FALSE             |
| chr11:59323373         | 6,30E-07 | 6,79E-03 | 0.113                  | <i>TRNA_Lys</i>     | -529                     | promoter     | NA                                          | -0.277                                         | <i>OSBP</i>           | NA            | NA        | NA              | FALSE             |
| chr11:122427608        | 7,05E-07 | 7,20E-03 | -0.19                  | <i>TRNA_Lys</i>     | -3047                    | intergenic   | NA                                          | -0.146                                         | <i>UBASH3B</i>        | NA            | NA        | NA              | FALSE             |
| chr22:49447896         | 8,09E-07 | 7,67E-03 | 0.225                  | <i>LOC100128946</i> | 185316                   | intergenic   | NA                                          | NA                                             | <i>NA</i>             | NA            | NA        | NA              | FALSE             |

|                 |          |          |        |              |         |            |        |        |              |    |    |    |       |
|-----------------|----------|----------|--------|--------------|---------|------------|--------|--------|--------------|----|----|----|-------|
| chr19:37463844  | 1,04E-06 | 9,32E-03 | 0.143  | ZNF568       | -271    | promoter   | 0.098  | -0.208 | ZNF345       | NA | NA | NA | FALSE |
| chr8:144660146  | 1,39E-06 | 1,10E-02 | 0.101  | NAPRT1       | 368     | promoter   | -0.285 | 0.361  | ZNF623       | NA | NA | NA | FALSE |
| chr7:154684199  | 1,44E-06 | 1,13E-02 | -0.147 | LOC100132707 | -36028  | exon       | NA     | 0.274  | PAXIP10S     | NA | NA | NA | FALSE |
| chr11:122427568 | 1,52E-06 | 1,17E-02 | -0.226 | TRNA_Lys     | -3087   | intergenic | NA     | -0.181 | UBASH3B      | NA | NA | NA | FALSE |
| chr11:122427550 | 1,61E-06 | 1,21E-02 | -0.228 | TRNA_Lys     | -3105   | intergenic | NA     | -0.068 | UBASH3B      | NA | NA | NA | FALSE |
| chr6:163570725  | 1,84E-06 | 1,30E-02 | -0.127 | AK296276     | 42116   | intron     | NA     | NA     | NA           | NA | NA | NA | TRUE  |
| chr6:121069679  | 1,95E-06 | 1,36E-02 | -0.152 | C6orf170     | 488530  | intergenic | NA     | NA     | NA           | NA | NA | NA | FALSE |
| chr10:2964694   | 2,05E-06 | 1,41E-02 | -0.121 | PFKP         | -145018 | intergenic | -0.114 | -0.114 | PFKP         | NA | NA | NA | FALSE |
| chr20:52556902  | 2,20E-06 | 1,47E-02 | 0.12   | BCAS1        | 55835   | intergenic | NA     | NA     | NA           | NA | NA | NA | FALSE |
| chr19:20179097  | 2,37E-06 | 1,57E-02 | -0.131 | ZNF90        | -9706   | intergenic | NA     | -0.21  | ZNF682       | NA | NA | NA | FALSE |
| chr18:77476221  | 2,64E-06 | 1,68E-02 | 0.125  | CTDP1        | 34793   | intron     | 0.191  | 0.191  | CTDP1        | NA | NA | NA | FALSE |
| chr5:110230057  | 3,03E-06 | 1,82E-02 | -0.119 | SLC25A46     | 155305  | intergenic | -0.115 | -0.115 | SLC25A46     | NA | NA | NA | FALSE |
| chr4:6550122    | 3,48E-06 | 2,01E-02 | -0.248 | PPP2R2C      | 7284    | intron     | NA     | -0.306 | AC093323.3   | NA | NA | NA | FALSE |
| chr8:95962352   | 3,66E-06 | 2,05E-02 | -0.129 | TP53INP1     | -738    | promoter   | -0.277 | -0.277 | TP53INP1     | NA | NA | NA | TRUE  |
| chr17:1479190   | 4,36E-06 | 2,29E-02 | -0.163 | PITPNA       | -13081  | intron     | -0.08  | 0.339  | INPP5K       | NA | NA | NA | FALSE |
| chr7:154684290  | 4,86E-06 | 2,44E-02 | -0.176 | LOC100132707 | -35937  | exon       | NA     | -0.163 | PAXIP1-AS1   | NA | NA | NA | FALSE |
| chr11:122427585 | 4,87E-06 | 2,44E-02 | -0.186 | TRNA_Lys     | -3070   | intergenic | NA     | -0.087 | UBASH3B      | NA | NA | NA | FALSE |
| chr10:46097162  | 5,20E-06 | 2,54E-02 | -0.116 | MARCH8       | -6809   | intergenic | 0.076  | 0.432  | ALOX5        | NA | NA | NA | FALSE |
| chr16:49569399  | 5,99E-06 | 2,74E-02 | 0.175  | ZNF423       | 128738  | intron     | NA     | NA     | NA           | NA | NA | NA | FALSE |
| chr2:27038329   | 6,17E-06 | 2,80E-02 | -0.217 | CENPA        | 29449   | intergenic | NA     | 0.39   | TMEM214      | NA | NA | NA | FALSE |
| chr22:49447865  | 6,30E-06 | 2,82E-02 | 0.283  | LOC100128946 | 185285  | intergenic | NA     | NA     | NA           | NA | NA | NA | FALSE |
| chr10:1416828   | 7,16E-06 | 2,98E-02 | -0.283 | ADARB2-AS1   | -151997 | intron     | NA     | NA     | NA           | NA | NA | NA | FALSE |
| chr16:1480869   | 7,38E-06 | 3,04E-02 | 0.135  | C16orf91     | -1525   | intergenic | -0.06  | 0.611  | TSR3         | NA | NA | NA | TRUE  |
| chr2:232061966  | 7,47E-06 | 3,06E-02 | 0.3    | ARMC9        | -1328   | intergenic | NA     | -0.186 | ACO17104.6   | NA | NA | NA | FALSE |
| chr18:11972539  | 7,53E-06 | 3,07E-02 | 0.157  | IMPA2        | -8888   | intergenic | 0.123  | -0.172 | MPPE1        | NA | NA | NA | FALSE |
| chr7:45854635   | 7,78E-06 | 3,16E-02 | 0.243  | DQ583079     | 4347    | intergenic | NA     | 0.347  | RP11-63818.1 | NA | NA | NA | FALSE |
| chr2:107200953  | 7,89E-06 | 3,19E-02 | -0.232 | RGPD3        | -116153 | intergenic | NA     | NA     | NA           | NA | NA | NA | FALSE |
| chr1:2785745    | 8,54E-06 | 3,33E-02 | -0.127 | TTC34        | -79516  | intergenic | NA     | NA     | NA           | NA | NA | NA | FALSE |
| chr20:61642401  | 8,55E-06 | 3,33E-02 | 0.125  | LOC63930     | 1668    | intron     | NA     | 0.483  | OGFR         | NA | NA | NA | FALSE |
| chr19:37807945  | 8,70E-06 | 3,37E-02 | 0.112  | HKR1         | -868    | promoter   | -0.162 | -0.462 | ZNF570       | NA | NA | NA | FALSE |
| chr1:172419808  | 9,17E-06 | 3,41E-02 | 0.161  | PIGC         | -6579   | intron     | -0.278 | -0.278 | PIGC         | NA | NA | NA | FALSE |
| chr9:136075132  | 9,36E-06 | 3,43E-02 | 0.133  | OBP2B        | 9497    | intergenic | NA     | -0.352 | SURF2        | NA | NA | NA | FALSE |
| chr19:13337161  | 9,34E-06 | 3,43E-02 | -0.144 | CACNA1A      | 31205   | intron     | NA     | -0.153 | NFIX         | NA | NA | NA | FALSE |
| chr7:98029163   | 9,54E-06 | 3,47E-02 | -0.16  | BAIAP2L1     | 1265    | intron     | 0.242  | -0.349 | TECPR1       | NA | NA | NA | FALSE |
| chr11:62370238  | 9,98E-06 | 3,54E-02 | -0.137 | MTA2         | -927    | promoter   | 0.281  | -0.427 | INTSS        | NA | NA | NA | FALSE |
| chr12:12225262  | 1,02E-05 | 3,56E-02 | -0.182 | BCL2L14      | 862     | promoter   | NA     | NA     | NA           | NA | NA | NA | TRUE  |
| chr11:42894941  | 1,04E-05 | 3,58E-02 | 0.309  | HNRNPKP3     | 395979  | intergenic | NA     | NA     | NA           | NA | NA | NA | FALSE |
| chr2:184044615  | 1,11E-05 | 3,72E-02 | -0.13  | NUP35        | 55534   | intergenic | 0.003  | 0.003  | NUP35        | NA | NA | NA | FALSE |
| chr3:194705981  | 1,11E-05 | 3,72E-02 | -0.125 | XXYL1        | 136944  | intergenic | -0.041 | NA     | NA           | NA | NA | NA | FALSE |
| chr20:46526153  | 1,11E-05 | 3,72E-02 | -0.121 | BX648826     | -58890  | intergenic | NA     | 0.307  | SULF2        | NA | NA | NA | FALSE |
| chr2:113192585  | 1,16E-05 | 3,81E-02 | 0.127  | RGPD8        | -524    | promoter   | -0.185 | -0.214 | ZC3H6        | NA | NA | NA | FALSE |
| chr6:1599310    | 1,18E-05 | 3,83E-02 | 0.104  | FOXC1        | -11371  | intergenic | NA     | NA     | NA           | NA | NA | NA | FALSE |
| chr2:113192546  | 1,20E-05 | 3,87E-02 | 0.101  | RGPD8        | -485    | promoter   | -0.175 | -0.192 | ZC3H8        | NA | NA | NA | FALSE |
| chr9:136075222  | 1,23E-05 | 3,94E-02 | 0.168  | OBP2B        | 9407    | intergenic | NA     | -0.256 | SURF2        | NA | NA | NA | FALSE |
| chr2:113192477  | 1,32E-05 | 4,13E-02 | 0.162  | RGPD8        | -416    | promoter   | -0.016 | 0.417  | TTL          | NA | NA | NA | FALSE |
| chr1:172419795  | 1,52E-05 | 4,44E-02 | 0.149  | PIGC         | -6566   | intron     | -0.13  | 0.172  | FASLG        | NA | NA | NA | FALSE |
| chr7:154684272  | 1,58E-05 | 4,55E-02 | -0.179 | LOC100132707 | -35955  | exon       | NA     | -0.062 | PAXIP1       | NA | NA | NA | FALSE |

|                 |          |          |        |                     |         |            |        |        |                     |    |    |    |       |
|-----------------|----------|----------|--------|---------------------|---------|------------|--------|--------|---------------------|----|----|----|-------|
| chr7:73648167   | 1,61E-05 | 4,57E-02 | -0.149 | <i>RFC2</i>         | 20572   | intron     | 0.016  | -0.313 | <i>LAT2</i>         | NA | NA | NA | FALSE |
| chr14:24801107  | 1,61E-05 | 4,57E-02 | -0.143 | <i>ADCY4</i>        | 3171    | exon       | 0.021  | 0.438  | <i>PSME2</i>        | NA | NA | NA | FALSE |
| chr16:87709152  | 1,65E-05 | 4,60E-02 | 0.37   | <i>FLJ00104</i>     | 26179   | intron     | NA     | 0.15   | <i>KLHDC4</i>       | NA | NA | NA | FALSE |
| chr9:136075488  | 1,83E-05 | 4,98E-02 | 0.139  | <i>OBP2B</i>        | 9141    | intergenic | NA     | 0.328  | <i>MED22</i>        | NA | NA | NA | FALSE |
| chr11:122427545 | 1,86E-05 | 5,01E-02 | -0.2   | <i>TRNA_Lys</i>     | -3110   | intergenic | NA     | -0.117 | <i>UBASH3B</i>      | NA | NA | NA | FALSE |
| chr9:136075435  | 1,93E-05 | 5,14E-02 | 0.124  | <i>OBP2B</i>        | 9194    | intergenic | NA     | 0.378  | <i>GBGT1</i>        | NA | NA | NA | FALSE |
| chr2:27038396   | 2,02E-05 | 5,23E-02 | -0.195 | <i>CENPA</i>        | 29516   | intergenic | NA     | 0.374  | <i>TMEM214</i>      | NA | NA | NA | FALSE |
| chr15:93277269  | 2,05E-05 | 5,30E-02 | 0.102  | <i>FAM174B</i>      | 36      | promoter   | NA     | -0.217 | <i>CHD2</i>         | NA | NA | NA | FALSE |
| chr2:176121784  | 2,15E-05 | 5,51E-02 | -0.142 | <i>ATP5G3</i>       | -75295  | intergenic | -0.043 | -0.099 | <i>ATF2</i>         | NA | NA | NA | FALSE |
| chr20:62797416  | 2,29E-05 | 5,68E-02 | 0.114  | <i>MYT1</i>         | 1591    | intron     | NA     | 0.206  | <i>RGS19</i>        | NA | NA | NA | FALSE |
| chr10:46097166  | 2,30E-05 | 5,70E-02 | -0.106 | <i>Mar.08</i>       | -6813   | intergenic | 0.205  | 0.372  | <i>ALOX5</i>        | NA | NA | NA | FALSE |
| chr18:77476218  | 2,32E-05 | 5,71E-02 | 0.105  | <i>CTDP1</i>        | 34790   | intron     | 0.151  | 0.151  | <i>CTDP1</i>        | NA | NA | NA | FALSE |
| chr19:22700806  | 2,42E-05 | 5,86E-02 | 0.233  | <i>LOC440518</i>    | -78253  | intergenic | NA     | NA     | <i>NA</i>           | NA | NA | NA | FALSE |
| chr19:37807898  | 2,42E-05 | 5,86E-02 | 0.166  | <i>HKR1</i>         | -915    | promoter   | -0.095 | -0.425 | <i>ZNF570</i>       | NA | NA | NA | FALSE |
| chr9:136063893  | 2,44E-05 | 5,89E-02 | -0.107 | <i>OBP2B</i>        | 20736   | intergenic | NA     | 0.137  | <i>GBGT1</i>        | NA | NA | NA | FALSE |
| chr3:118892467  | 2,53E-05 | 5,96E-02 | 0.219  | <i>UPK1B</i>        | 44      | promoter   | NA     | 0.261  | <i>ARHGAP31</i>     | NA | NA | NA | FALSE |
| chr6:39280817   | 2,51E-05 | 5,96E-02 | -0.187 | <i>KCNK17</i>       | 1421    | intron     | NA     | -0.364 | <i>SAYS1</i>        | NA | NA | NA | FALSE |
| chr8:72754307   | 2,50E-05 | 5,96E-02 | 0.108  | <i>LOC100132891</i> | -1051   | exon       | NA     | 0.42   | <i>MSC</i>          | NA | NA | NA | FALSE |
| chr5:173991159  | 2,58E-05 | 6,03E-02 | 0.138  | <i>MSX2</i>         | -160416 | intergenic | NA     | NA     | <i>NA</i>           | NA | NA | NA | FALSE |
| chr19:56769427  | 2,65E-05 | 6,09E-02 | -0.175 | <i>ZSCAN5A</i>      | -29769  | intron     | NA     | -0.338 | <i>ZNF444</i>       | NA | NA | NA | FALSE |
| chr21:46677471  | 2,65E-05 | 6,09E-02 | 0.523  | <i>POFUT2</i>       | 19855   | intron     | 0.279  | 0.279  | <i>POFUT2</i>       | NA | NA | NA | FALSE |
| chr6:1599373    | 2,72E-05 | 6,18E-02 | 0.149  | <i>FOXC1</i>        | -11308  | intergenic | NA     | NA     | <i>NA</i>           | NA | NA | NA | FALSE |
| chr4:81110085   | 2,88E-05 | 6,40E-02 | -0.265 | <i>PRDM8</i>        | 3663    | intron     | -0.002 | -0.116 | <i>ANTXR2</i>       | NA | NA | NA | FALSE |
| chr8:54935437   | 2,92E-05 | 6,40E-02 | 0.108  | <i>TCEA1</i>        | -430    | promoter   | -0.275 | -0.275 | <i>TCEA1</i>        | NA | NA | NA | FALSE |
| chr10:1416879   | 2,87E-05 | 6,40E-02 | -0.197 | <i>ADARB2-AS1</i>   | -151946 | intron     | NA     | NA     | <i>NA</i>           | NA | NA | NA | FALSE |
| chr17:4805462   | 3,03E-05 | 6,52E-02 | 0.146  | <i>CHRNE</i>        | 908     | promoter   | -0.138 | 0.389  | <i>GP1BA</i>        | NA | NA | NA | FALSE |
| chr10:1416819   | 3,09E-05 | 6,60E-02 | -0.294 | <i>ADARB2-AS1</i>   | -152006 | intron     | NA     | NA     | <i>NA</i>           | NA | NA | NA | FALSE |
| chr11:122427594 | 3,08E-05 | 6,60E-02 | -0.225 | <i>TRNA_Lys</i>     | -3061   | intergenic | NA     | -0.126 | <i>UBASH3B</i>      | NA | NA | NA | FALSE |
| chr8:54935522   | 3,12E-05 | 6,63E-02 | 0.148  | <i>TCEA1</i>        | -515    | promoter   | 0.157  | 0.214  | <i>ATP6V1H</i>      | NA | NA | NA | FALSE |
| chr12:32626634  | 3,26E-05 | 6,79E-02 | -0.411 | <i>FGD4</i>         | -12272  | intergenic | 0.05   | 0.229  | <i>DNM1L</i>        | NA | NA | NA | FALSE |
| chr16:9091790   | 3,50E-05 | 7,06E-02 | -0.111 | <i>USP7</i>         | -34450  | intergenic | 0.11   | 0.325  | <i>PMM2</i>         | NA | NA | NA | FALSE |
| chr6:1594275    | 3,75E-05 | 7,39E-02 | 0.121  | <i>FOXC1</i>        | -16406  | intergenic | NA     | NA     | <i>NA</i>           | NA | NA | NA | TRUE  |
| chr11:59323375  | 3,73E-05 | 7,39E-02 | 0.117  | <i>TRNA_Lys</i>     | -527    | promoter   | NA     | -0.151 | <i>STX3</i>         | NA | NA | NA | FALSE |
| chr11:122427537 | 3,86E-05 | 7,56E-02 | -0.196 | <i>TRNA_Lys</i>     | -3118   | intergenic | NA     | -0.052 | <i>UBASH3B</i>      | NA | NA | NA | FALSE |
| chr14:19888831  | 3,92E-05 | 7,61E-02 | -0.127 | <i>LINC00516</i>    | -5538   | intron     | NA     | NA     | <i>NA</i>           | NA | NA | NA | FALSE |
| chr21:46714850  | 4,03E-05 | 7,77E-02 | -0.153 | <i>LOC642852</i>    | 6871    | exon       | NA     | -0.347 | <i>POFUT2</i>       | NA | NA | NA | FALSE |
| chr4:81111299   | 4,08E-05 | 7,82E-02 | -0.234 | <i>PRDM8</i>        | 4877    | intron     | 0.037  | -0.15  | <i>ANTXR2</i>       | NA | NA | NA | FALSE |
| chr5:271209     | 4,12E-05 | 7,86E-02 | 0.109  | <i>PDCD6</i>        | -527    | promoter   | -0.031 | 0.195  | <i>CTD-2228K2.5</i> | NA | NA | NA | FALSE |
| chr3:193678373  | 4,18E-05 | 7,94E-02 | -0.108 | <i>DPPA2P3</i>      | 33655   | intron     | NA     | 0.215  | <i>HES1</i>         | NA | NA | NA | FALSE |
| chr10:1416906   | 4,26E-05 | 8,00E-02 | -0.214 | <i>ADARB2-AS1</i>   | -151919 | intron     | NA     | NA     | <i>NA</i>           | NA | NA | NA | FALSE |
| chr10:132893061 | 4,40E-05 | 8,09E-02 | 0.26   | <i>MIR378C</i>      | -132131 | intron     | NA     | NA     | <i>NA</i>           | NA | NA | NA | FALSE |
| chr19:1047251   | 4,93E-05 | 8,68E-02 | 0.171  | <i>ABCA7</i>        | 4592    | exon       | 0.077  | 0.501  | <i>ATP5D</i>        | NA | NA | NA | FALSE |
| chr19:22800813  | 4,94E-05 | 8,68E-02 | 0.101  | <i>BC030765</i>     | 5961    | intron     | NA     | NA     | <i>NA</i>           | NA | NA | NA | FALSE |
| chr7:64540916   | 4,97E-05 | 8,70E-02 | -0.159 | <i>BC044608</i>     | 723     | promoter   | NA     | 0.215  | <i>ERV3-1</i>       | NA | NA | NA | FALSE |
| chr9:137673947  | 5,04E-05 | 8,72E-02 | -0.262 | <i>MIR3689C</i>     | 67269   | intron     | NA     | 0.49   | <i>FCN1</i>         | NA | NA | NA | FALSE |
| chr14:105636665 | 5,10E-05 | 8,78E-02 | -0.226 | <i>JAG2</i>         | -1505   | intergenic | 0.174  | 0.262  | <i>NUDT14</i>       | NA | NA | NA | FALSE |
| chr11:122427606 | 5,26E-05 | 8,99E-02 | -0.241 | <i>TRNA_Lys</i>     | -3049   | intergenic | NA     | -0.118 | <i>UBASH3B</i>      | NA | NA | NA | FALSE |

|                |          |          |        |                 |         |            |        |        |               |            |             |           |       |
|----------------|----------|----------|--------|-----------------|---------|------------|--------|--------|---------------|------------|-------------|-----------|-------|
| chr19:50962487 | 5,31E-05 | 9,00E-02 | 0.121  | <i>EMC10</i>    | -17170  | exon       | 0.012  | 0.527  | <i>KCNC3</i>  | NA         | NA          | NA        | FALSE |
| chr3:96495764  | 5,74E-05 | 9,29E-02 | -0.151 | <i>EPHA6</i>    | -37661  | intergenic | NA     | NA     | <i>NA</i>     | NA         | NA          | NA        | FALSE |
| chr16:1310093  | 5,81E-05 | 9,32E-02 | 0.12   | <i>TPSD1</i>    | 3578    | intergenic | NA     | 0.372  | <i>GNPTG</i>  | NA         | NA          | NA        | FALSE |
| chr19:22800795 | 5,93E-05 | 9,44E-02 | 0.111  | <i>BCO30765</i> | 5979    | intron     | NA     | NA     | <i>NA</i>     | NA         | NA          | NA        | FALSE |
| chr2:113190197 | 6,01E-05 | 9,55E-02 | 0.132  | <i>RGPD8</i>    | 1026    | intron     | -0.151 | 0.152  | <i>TTL</i>    | NA         | NA          | NA        | TRUE  |
| chr19:50962477 | 6,22E-05 | 9,76E-02 | 0.137  | <i>EMC10</i>    | -17180  | exon       | -0.1   | -0.275 | <i>MYBPC2</i> | NA         | NA          | NA        | FALSE |
| chr12:6252166  | 6,54E-05 | 9,92E-02 | -0.193 | <i>VWF</i>      | -18331  | intergenic | NA     | -0.165 | <i>CD9</i>    | NA         | NA          | NA        | FALSE |
| chr22:38714287 | 6,47E-05 | 9,92E-02 | 0.112  | <i>CSNK1E</i>   | -199    | promoter   | 0.041  | 0.041  | <i>CSNK1E</i> | cg06748147 | 0.042906225 | -3.660446 | TRUE  |
| chr2:107200920 | 6,62E-05 | 9,98E-02 | -0.185 | <i>RGPD3</i>    | -116120 | intergenic | NA     | NA     | <i>NA</i>     | NA         | NA          | NA        | FALSE |

**ESM Table 12. Differentially methylated regions identified in the CD4<sup>+</sup>T cell fraction between cases and controls prior to seroconversion**

| Differentially methylated region |               |                            |                         |                         |                         |                     | Nearest gene        |                          |              | GeneHancer analysis |                                                         |
|----------------------------------|---------------|----------------------------|-------------------------|-------------------------|-------------------------|---------------------|---------------------|--------------------------|--------------|---------------------|---------------------------------------------------------|
| DMR                              | Area size, bp | Number of significant CpGs | Number of positive CpGs | Number of negative CpGs | Best P value within DMR | Best FDR within FDR | Nearest gene        | Distance to nearest gene | Genomic part | GeneHancer database | Genes possibly regulated by enhancer or promoter        |
| chr19:18118304-chr19:18118337    | 33            | 2                          | 0                       | 2                       | 4,22E-22                | 1,64E-16            | <i>ARRDC2</i>       | -673                     | promoter     |                     |                                                         |
| chr7:3169658-chr7:3169674        | 16            | 2                          | 2                       | 0                       | 4,76E-13                | 4,62E-08            | <i>BC038729</i>     | 44630                    | intergenic   |                     |                                                         |
| chr2:27038313-chr2:27038448      | 135           | 8                          | 0                       | 8                       | 1,50E-11                | 6,25E-07            | <i>CENPA</i>        | 29459                    | intergenic   |                     |                                                         |
| chr19:37807627-chr19:37807945    | 318           | 19                         | 19                      | 0                       | 1,61E-11                | 6,25E-07            | <i>HKR1</i>         | -907                     | promoter     | promoter            | <i>ZNF527, ZNF793, LINCO1535, HKR1, ENSG00000267682</i> |
| chr2:113192114-chr2:113192585    | 471           | 8                          | 8                       | 0                       | 6,97E-11                | 2,25E-06            | <i>RGPD8</i>        | -100                     | promoter     |                     |                                                         |
| chr22:39633525-chr22:39633541    | 16            | 2                          | 2                       | 0                       | 1,04E-08                | 1,49E-04            | <i>PDGFB</i>        | 3390                     | intron       | promoter            | <i>CBX7, SYNGR1, PDGFB</i>                              |
| chr19:58571181-chr19:58571458    | 277           | 9                          | 9                       | 0                       | 1,36E-08                | 1,75E-04            | <i>ZNF135</i>       | 836                      | promoter     | promoter            | <i>ZNF135</i>                                           |
| chr5:270987-chr5:271170          | 183           | 3                          | 3                       | 0                       | 2,15E-08                | 2,53E-04            | <i>PDCD6</i>        | -749                     | promoter     | promoter            | <i>HRAT5</i>                                            |
| chr18:77397918-chr18:77398519    | 601           | 21                         | 21                      | 0                       | 3,06E-08                | 3,27E-04            | <i>CTDP1</i>        | -41603                   | intergenic   |                     |                                                         |
| chr1:228658942-chr1:228659210    | 268           | 12                         | 12                      | 0                       | 3,33E-08                | 3,40E-04            | <i>Histone3</i>     | -7151                    | intergenic   |                     |                                                         |
| chr7:22860953-chr7:22861119      | 166           | 13                         | 0                       | 13                      | 3,68E-08                | 3,56E-04            | <i>TOMM7</i>        | 1487                     | intron       | promoter            | <i>TOMM7</i>                                            |
| chr21:47307634-chr21:47307825    | 191           | 9                          | 0                       | 9                       | 7,69E-08                | 6,48E-04            | <i>PCBP3</i>        | -8310                    | intron       | enhancer            | <i>PCBP3</i>                                            |
| chr14:103227394-chr14:103227476  | 82            | 3                          | 0                       | 3                       | 1,19E-07                | 9,42E-04            | <i>TRAF3</i>        | -16422                   | intergenic   |                     |                                                         |
| chr2:130794723-chr2:130794741    | 18            | 5                          | 0                       | 5                       | 1,29E-07                | 1,00E-03            | <i>LOC440905</i>    | -5242                    | intron       |                     |                                                         |
| chr12:32626634-chr12:32626743    | 109           | 3                          | 0                       | 3                       | 1,42E-07                | 1,08E-03            | <i>FGD4</i>         | -12272                   | intergenic   |                     |                                                         |
| chr9:136074985-chr9:136075539    | 554           | 13                         | 13                      | 0                       | 1,56E-07                | 1,10E-03            | <i>OBP2B</i>        | 9194                     | intergenic   |                     |                                                         |
| chr22:49447601-chr22:49448582    | 981           | 23                         | 23                      | 0                       | 2,27E-07                | 1,33E-03            | <i>LOC100128946</i> | 185327                   | intergenic   |                     |                                                         |
| chr9:137673743-chr9:137674085    | 342           | 15                         | 0                       | 15                      | 4,05E-07                | 2,15E-03            | <i>MIR3689C</i>     | 67367                    | intron       |                     |                                                         |
| chr19:2561771-chr19:2561793      | 22            | 2                          | 2                       | 0                       | 4,47E-07                | 2,34E-03            | <i>BC022568</i>     | 82057                    | intron       |                     |                                                         |
| chr10:71801791-chr10:71802193    | 402           | 4                          | 0                       | 4                       | 5,16E-07                | 2,48E-03            | <i>H2AFY2</i>       | -10200                   | intergenic   |                     |                                                         |
| chr4:186808118-chr4:186808125    | 7             | 2                          | 0                       | 2                       | 5,70E-07                | 2,66E-03            | <i>SORBS2</i>       | 69753                    | intron       |                     |                                                         |
| chr15:93277255-chr15:93277269    | 14            | 2                          | 2                       | 0                       | 7,08E-07                | 3,19E-03            | <i>FAM174B</i>      | 50                       | promoter     | promoter            | <i>FAM174B</i>                                          |
| chr5:43000441-chr5:43000725      | 284           | 4                          | 0                       | 4                       | 8,34E-07                | 3,52E-03            | <i>AK056817</i>     | -7183                    | intergenic   |                     |                                                         |
| chr13:48892744-chr13:48892861    | 117           | 5                          | 0                       | 5                       | 1,09E-06                | 4,22E-03            | <i>RB1</i>          | 14946                    | intron       |                     |                                                         |
| chr4:961370-chr4:962384          | 1014          | 18                         | 18                      | 0                       | 1,29E-06                | 4,84E-03            | <i>DGKQ</i>         | 5947                     | exon         |                     |                                                         |
| chr1:30911320-chr1:30911425      | 105           | 2                          | 0                       | 2                       | 1,30E-06                | 4,84E-03            | <i>MATN1-AS1</i>    | -280194                  | intergenic   |                     |                                                         |
| chr4:132896374-chr4:132897121    | 747           | 6                          | 0                       | 6                       | 1,44E-06                | 5,18E-03            | <i>BC131768</i>     | 247749                   | intergenic   |                     |                                                         |
| chr3:171464839-chr3:171464959    | 120           | 3                          | 0                       | 3                       | 1,62E-06                | 5,65E-03            | <i>PLD1</i>         | 63546                    | intron       |                     |                                                         |
| chr19:1336229-chr19:1336307      | 78            | 4                          | 4                       | 0                       | 1,77E-06                | 5,90E-03            | <i>MUM1</i>         | -18675                   | intergenic   |                     |                                                         |
| chr10:74082048-chr10:74082090    | 42            | 4                          | 4                       | 0                       | 1,84E-06                | 6,01E-03            | <i>DNAJB12</i>      | 32852                    | intergenic   | enhancer            | <i>DDIT4, DNAJB12</i>                                   |
| chr7:64540896-chr7:64541058      | 162           | 3                          | 0                       | 3                       | 2,66E-06                | 7,76E-03            | <i>BC044608</i>     | 743                      | promoter     | enhancer            | <i>GTF2IP14</i>                                         |
| chr22:44529945-chr22:44530101    | 156           | 6                          | 6                       | 0                       | 2,95E-06                | 8,40E-03            | <i>TRNA_Sec</i>     | -16509                   | intron       |                     |                                                         |
| chr3:196694114-chr3:196694374    | 260           | 9                          | 0                       | 9                       | 3,06E-06                | 8,65E-03            | <i>PIGZ</i>         | 1341                     | intron       |                     |                                                         |
| chr11:122427377-chr11:122427617  | 240           | 13                         | 0                       | 13                      | 3,37E-06                | 9,14E-03            | <i>TRNA_Lys</i>     | -3049                    | intergenic   |                     |                                                         |
| chr8:95962244-chr8:95962383      | 139           | 7                          | 0                       | 7                       | 5,46E-06                | 1,22E-02            | <i>TP53INP1</i>     | -656                     | promoter     | promoter            | <i>NDUFAF6, TP53INP1</i>                                |
| chr6:28459146-chr6:28459170      | 24            | 2                          | 0                       | 2                       | 5,92E-06                | 1,30E-02            | <i>TRNA_Thr</i>     | -2304                    | intergenic   |                     |                                                         |
| chr13:21900270-chr13:21900480    | 210           | 9                          | 0                       | 9                       | 6,16E-06                | 1,34E-02            | <i>MIPEPP3</i>      | 28098                    | intron       | enhancer            | <i>GRK6P1, LINCO0539</i>                                |
| chr20:56247302-chr20:56247315    | 13            | 2                          | 0                       | 2                       | 6,78E-06                | 1,43E-02            | <i>PMEPA1</i>       | 18379                    | intron       | enhancer            | <i>PMEPA1</i>                                           |
| chr16:89050366-chr16:89050672    | 306           | 7                          | 7                       | 0                       | 6,80E-06                | 1,43E-02            | <i>CBFA2T3</i>      | -7089                    | intergenic   | enhancer            | <i>CBFA2T3</i>                                          |
| chr10:15038010-chr10:15038132    | 122           | 4                          | 4                       | 0                       | 8,55E-06                | 1,67E-02            | <i>DCLRE1C</i>      | 25731                    | intron       |                     |                                                         |
| chr18:60278762-chr18:60278915    | 153           | 6                          | 6                       | 0                       | 8,66E-06                | 1,67E-02            | <i>DKFZp451A185</i> | 29853                    | intergenic   |                     |                                                         |
| chr15:101661777-chr15:101662001  | 224           | 8                          | 0                       | 8                       | 9,37E-06                | 1,68E-02            | <i>CHSY1</i>        | 66461                    | intergenic   | enhancer            | <i>CHSY1</i>                                            |

|                                      |     |    |    |    |          |          |            |         |            |          |                                |
|--------------------------------------|-----|----|----|----|----------|----------|------------|---------|------------|----------|--------------------------------|
| chr17:48586117-chr17:48586230        | 113 | 7  | 7  | 0  | 9,66E-06 | 1,71E-02 | MYCBPAP    | 487     | promoter   | promoter | EPN3, MYCBPAP                  |
| chr22:17198946-chr22:17199120        | 174 | 9  | 0  | 9  | 1,09E-05 | 1,80E-02 | BC038197   | 30355   | intergenic |          |                                |
| chr19:58521594-chr19:58521598        | 4   | 2  | 2  | 0  | 1,30E-05 | 1,99E-02 | ZNF606     | -6881   | intergenic | promoter | LOC100128398                   |
| chr12:133304192-chr12:133304215      | 23  | 2  | 0  | 2  | 1,38E-05 | 2,08E-02 | ANKLE2     | 7084    | intron     |          |                                |
| chr2:74643130-chr2:74643331          | 201 | 12 | 12 | 0  | 1,50E-05 | 2,18E-02 | DQ588163   | 679     | promoter   |          |                                |
| chr11:67297539-chr11:67297564        | 25  | 2  | 0  | 2  | 1,59E-05 | 2,26E-02 | CABP2      | -6641   | intergenic |          |                                |
| chr19:5131177-chr19:5131521          | 344 | 8  | 0  | 8  | 1,63E-05 | 2,30E-02 | BC032415   | 17592   | exon       |          |                                |
| chr10:31040591-chr10:31040696        | 105 | 4  | 4  | 0  | 1,64E-05 | 2,30E-02 | AK302694   | 59491   | intergenic |          |                                |
| chr3:50231090-chr3:50231414          | 324 | 5  | 5  | 0  | 1,67E-05 | 2,32E-02 | GNAT1      | 2079    | intron     | enhancer | RBM6, HYAL3                    |
| chr16:32289963-chr16:32290029        | 66  | 3  | 0  | 3  | 1,68E-05 | 2,32E-02 | LOC390705  | 11340   | intergenic |          |                                |
| chr6:163570179-chr6:163570616        | 437 | 17 | 0  | 17 | 1,86E-05 | 2,50E-02 | AK296276   | 42662   | intron     |          |                                |
| chr10:110075471-chr10:110075815      | 344 | 14 | 0  | 14 | 1,88E-05 | 2,50E-02 | 7SK        | 625445  | intergenic |          |                                |
| chr11:67351930-chr11:67351952        | 22  | 5  | 0  | 5  | 1,92E-05 | 2,53E-02 | GSTP1      | 873     | promoter   | promoter | NDUVF1, NUDT8, ENSG00000255119 |
| chr14:19888706-chr14:19889043        | 337 | 5  | 0  | 5  | 2,07E-05 | 2,64E-02 | LINC00516  | -5349   | intron     |          |                                |
| chr7:76129266-chr7:76129437          | 171 | 9  | 0  | 9  | 2,18E-05 | 2,71E-02 | DTX2       | 301     | promoter   |          |                                |
| chr1:7843461-chr1:7843473            | 12  | 2  | 2  | 0  | 2,30E-05 | 2,77E-02 | PER3       | -907    | promoter   | promoter | PER3                           |
| chr16:88453817-chr16:88453894        | 77  | 5  | 5  | 0  | 2,40E-05 | 2,83E-02 | ZNF469     | -39985  | intergenic | enhancer | ZNF469                         |
| chr7:1371569-chr7:1371590            | 21  | 2  | 0  | 2  | 2,42E-05 | 2,84E-02 | UNCX       | 98917   | intergenic |          |                                |
| chr19:22700771-chr19:22700778        | 7   | 2  | 2  | 0  | 2,65E-05 | 3,01E-02 | LOC440518  | -78288  | intergenic |          |                                |
| chr1:43814495-chr1:43814672          | 177 | 14 | 0  | 14 | 2,69E-05 | 3,03E-02 | CDC20      | -10049  | exon       |          |                                |
| chr1:178456064-chr1:178456108        | 44  | 5  | 5  | 0  | 3,11E-05 | 3,22E-02 | TEX35      | -26148  | intergenic |          |                                |
| chr2:1817284-chr2:1817793            | 509 | 23 | 23 | 0  | 4,12E-05 | 3,80E-02 | MYT1L      | 29193   | intron     |          |                                |
| <b>chr7:128580072-chr7:128580230</b> | 158 | 5  | 5  | 0  | 4,14E-05 | 3,82E-02 | IRF5       | -542    | promoter   | promoter | IRF5                           |
| chr2:73496134-chr2:73496203          | 69  | 5  | 0  | 5  | 4,29E-05 | 3,84E-02 | FBXO41     | 655     | promoter   |          |                                |
| chr22:26323528-chr22:26323710        | 182 | 4  | 0  | 4  | 4,61E-05 | 4,03E-02 | MYO18B     | -27435  | intron     |          |                                |
| chr11:68782089-chr11:68782202        | 113 | 4  | 0  | 4  | 5,24E-05 | 4,36E-02 | MRGPRF     | -1266   | intron     | promoter | MRPL21, IGHMBP2, MRGPRF        |
| chr16:67997858-chr16:67997921        | 63  | 2  | 0  | 2  | 5,24E-05 | 4,36E-02 | SLC12A4    | 48      | promoter   | promoter | PRMT7                          |
| chr6:121069653-chr6:121069703        | 50  | 4  | 0  | 4  | 5,26E-05 | 4,36E-02 | C6orf170   | 488540  | intergenic |          |                                |
| chr7:75280121-chr7:75280192          | 71  | 3  | 0  | 3  | 5,32E-05 | 4,40E-02 | HIP1       | 88134   | intron     | enhancer | HIP1                           |
| chr22:25233624-chr22:25233695        | 71  | 4  | 4  | 0  | 5,51E-05 | 4,49E-02 | SGSM1      | -5803   | intron     |          |                                |
| chr19:728066-chr19:728176            | 110 | 6  | 0  | 6  | 6,06E-05 | 4,74E-02 | PALM       | 351     | promoter   |          |                                |
| chr19:48000357-chr19:48000450        | 93  | 3  | 0  | 3  | 6,19E-05 | 4,77E-02 | NAPA-AS1   | 12820   | intron     |          |                                |
| chr4:675645-chr4:675792              | 147 | 12 | 0  | 12 | 7,92E-05 | 5,46E-02 | MFSD7      | 3246    | intron     |          |                                |
| chr4:186318341-chr4:186318356        | 15  | 3  | 0  | 3  | 8,23E-05 | 5,63E-02 | ANKRD37    | 510     | promoter   | promoter | LRP2BP, UFPS2, C4orf47         |
| chr10:132961346-chr10:132961395      | 49  | 2  | 0  | 2  | 9,90E-05 | 6,06E-02 | TCERG1L    | 97313   | exon       |          |                                |
| chr12:127631022-chr12:127631189      | 167 | 10 | 0  | 10 | 1,01E-04 | 6,12E-02 | BC032874   | -86124  | intergenic | promoter | ENSG00000256001                |
| chr1:152161878-chr1:152161927        | 49  | 5  | 5  | 0  | 1,05E-04 | 6,27E-02 | RPTN       | -30175  | intergenic | promoter | FLG-AS1                        |
| chr4:3835894-chr4:3835991            | 97  | 3  | 0  | 3  | 1,09E-04 | 6,38E-02 | ADRA2C     | 67685   | intergenic |          |                                |
| chr4:2062464-chr4:2062937            | 473 | 12 | 0  | 12 | 1,10E-04 | 6,39E-02 | NAT8L      | 1651    | exon       |          |                                |
| chr1:62752777-chr1:62752894          | 117 | 2  | 0  | 2  | 1,24E-04 | 6,79E-02 | KANK4      | -14432  | intron     | enhancer | KANK4                          |
| chr19:1047141-chr19:1047348          | 207 | 8  | 8  | 0  | 1,24E-04 | 6,80E-02 | ABCA7      | 4558    | exon       |          |                                |
| chr5:1246414-chr5:1246456            | 42  | 4  | 4  | 0  | 1,41E-04 | 7,30E-02 | SLC6A18    | 20980   | intergenic |          |                                |
| chr8:144659799-chr8:144659988        | 189 | 18 | 18 | 0  | 1,43E-04 | 7,35E-02 | NAPRT1     | 549     | promoter   | promoter | NAPRT                          |
| chr2:232347976-chr2:232348566        | 590 | 14 | 14 | 0  | 1,57E-04 | 7,73E-02 | NCL        | -19318  | intergenic |          |                                |
| chr21:46677404-chr21:46677632        | 228 | 9  | 9  | 0  | 1,61E-04 | 7,83E-02 | POFUT2     | 19846   | intron     |          |                                |
| chr10:1416791-chr10:1416983          | 192 | 11 | 0  | 11 | 1,64E-04 | 7,96E-02 | ADARB2-AS1 | -151997 | intron     |          |                                |
| chr1:43425385-chr1:43425514          | 129 | 8  | 8  | 0  | 1,71E-04 | 8,13E-02 | SLC2A1     | -606    | promoter   | promoter | SVBP, SLC2A1, SLC2A1-AS1       |
| chr18:76002967-chr18:76003069        | 102 | 3  | 0  | 3  | 1,77E-04 | 8,24E-02 | SALL3      | -737206 | intergenic |          |                                |

|                               |     |    |    |    |          |          |                  |                  |          |                          |
|-------------------------------|-----|----|----|----|----------|----------|------------------|------------------|----------|--------------------------|
| chr21:46714650-chr21:46714850 | 200 | 10 | 0  | 10 | 1,85E-04 | 8,37E-02 | <i>LOC642852</i> | 6797 exon        | enhancer | <i>POFUT2, LINC00205</i> |
| chr2:150177044-chr2:150177357 | 313 | 4  | 4  | 0  | 1,86E-04 | 8,37E-02 | <i>LYPD6</i>     | -9142 intergenic |          |                          |
| chr17:135245-chr17:135302     | 57  | 5  | 5  | 0  | 1,90E-04 | 8,48E-02 | <i>RPH3AL</i>    | 42121 intron     |          |                          |
| chr11:78614302-chr11:78614306 | 4   | 2  | 2  | 0  | 2,12E-04 | 9,02E-02 | <i>ODZ4</i>      | 59097 intron     |          |                          |
| chr18:11972458-chr18:11972666 | 208 | 6  | 6  | 0  | 2,34E-04 | 9,56E-02 | <i>IMPA2</i>     | -8899 intergenic |          |                          |
| chr11:400130-chr11:400432     | 302 | 14 | 14 | 0  | 2,35E-04 | 9,57E-02 | <i>PKP3</i>      | 6026 intron      |          |                          |
| chr15:79092681-chr15:79092841 | 160 | 7  | 7  | 0  | 2,52E-04 | 9,92E-02 | <i>ADAMTS7</i>   | 10938 exon       |          |                          |

**ESM Table 13. Differentially methylated regions identified in the CD8<sup>+</sup>T cell fraction between cases and controls prior to seroconversion**

| Differentially methylated region |               |                            |                         |                         |                         |                     | Nearest gene        |                          |              | GeneHancer analysis |                                                         |
|----------------------------------|---------------|----------------------------|-------------------------|-------------------------|-------------------------|---------------------|---------------------|--------------------------|--------------|---------------------|---------------------------------------------------------|
| DMR                              | Area size, bp | Number of significant CpGs | Number of positive CpGs | Number of negative CpGs | Best P value within DMR | Best FDR within FDR | Nearest gene        | Distance to nearest gene | Genomic part | GeneHancer database | Genes possibly regulated by enhancer or promoter        |
| chr7:3169658-chr7:3169674        | 16            | 2                          | 2                       | 0                       | 3,00E-10                | 2,31E-05            | <i>BC038729</i>     | 44630                    | intergenic   |                     |                                                         |
| chr19:12035022-chr19:12035043    | 21            | 2                          | 2                       | 0                       | 3,10E-10                | 2,31E-05            | <i>ZNF700</i>       | -840                     | promoter     | promoter            | <i>ZNF700, ZNF763, ENSG00000267274</i>                  |
| chr14:45343058-chr14:45343116    | 58            | 2                          | 0                       | 2                       | 6,22E-10                | 4,33E-05            | <i>C14orf28</i>     | -23449                   | intergenic   |                     |                                                         |
| chr21:47307692-chr21:47307825    | 133           | 6                          | 0                       | 6                       | 6,48E-09                | 3,38E-04            | <i>PCBP3</i>        | -8385                    | intron       | enhancer            | <i>PCBP3</i>                                            |
| chr16:58534501-chr16:58534640    | 139           | 3                          | 3                       | 0                       | 8,70E-09                | 4,13E-04            | <i>NDRG4</i>        | 551                      | promoter     | promoter            | <i>NDRG4</i>                                            |
| chr9:137673739-chr9:137675444    | 1705          | 28                         | 0                       | 28                      | 3,92E-08                | 1,35E-03            | <i>MIR3689C</i>     | 67218                    | intron       |                     |                                                         |
| chr18:60278578-chr18:60278825    | 247           | 5                          | 5                       | 0                       | 4,29E-08                | 1,35E-03            | <i>DKFZp451A185</i> | 29589                    | intergenic   |                     |                                                         |
| chr4:56023751-chr4:56023797      | 46            | 4                          | 4                       | 0                       | 8,68E-08                | 2,45E-03            | <i>KDR</i>          | -31990                   | intergenic   |                     |                                                         |
| chr19:37807633-chr19:37807939    | 306           | 13                         | 13                      | 0                       | 1,40E-07                | 3,61E-03            | <i>HKR1</i>         | -1025                    | intron       | promoter            | <i>ZNF527, LINC01535, ZNF793, HKR1, ENSG00000267682</i> |
| chr21:46714714-chr21:46714891    | 177           | 7                          | 0                       | 7                       | 1,98E-07                | 4,59E-03            | <i>LOC642852</i>    | 6912                     | exon         | enhancer            | <i>LINC00205</i>                                        |
| chr16:8960438-chr16:8960833      | 395           | 18                         | 0                       | 18                      | 3,16E-07                | 6,34E-03            | <i>CARHSP1</i>      | 772                      | promoter     | promoter            | <i>PMM2, CARHSP1, ENSG00000260276</i>                   |
| chr1:145385184-chr1:145385411    | 227           | 15                         | 14                      | 1                       | 3,51E-07                | 6,42E-03            | <i>TRNA_Asn</i>     | -430                     | promoter     |                     |                                                         |
| chr14:24801052-chr14:24801180    | 128           | 5                          | 0                       | 5                       | 4,51E-07                | 7,14E-03            | <i>ADCY4</i>        | 3171                     | exon         |                     |                                                         |
| chr11:42895488-chr11:42895608    | 120           | 3                          | 3                       | 0                       | 5,21E-07                | 7,77E-03            | <i>HNRNPKP3</i>     | 395432                   | intergenic   |                     |                                                         |
| chr6:53069701-chr6:53069739      | 38            | 3                          | 0                       | 3                       | 5,61E-07                | 8,02E-03            | <i>GCM1</i>         | -56110                   | intergenic   |                     |                                                         |
| chr22:50472562-chr22:50473702    | 1140          | 6                          | 0                       | 6                       | 8,97E-07                | 1,13E-02            | <i>IL17REL</i>      | -21508                   | intergenic   |                     |                                                         |
| chr4:132896405-chr4:132897280    | 875           | 23                         | 0                       | 23                      | 9,74E-07                | 1,16E-02            | <i>BC131768</i>     | 247839                   | intergenic   |                     |                                                         |
| chr4:8890256-chr4:8891755        | 1499          | 8                          | 8                       | 0                       | 9,90E-07                | 1,16E-02            | <i>HMX1</i>         | -16714                   | intergenic   |                     |                                                         |
| chr5:270919-chr5:271170          | 251           | 8                          | 8                       | 0                       | 1,12E-06                | 1,27E-02            | <i>PDCD6</i>        | -682                     | promoter     | promoter            | <i>HRAT5</i>                                            |
| chr5:80529067-chr5:80529208      | 141           | 8                          | 0                       | 8                       | 1,30E-06                | 1,37E-02            | <i>CKMT2</i>        | -72                      | promoter     | promoter            | <i>CKMT2-AS1</i>                                        |
| chr11:3662811-chr11:3662967      | 156           | 2                          | 0                       | 2                       | 1,32E-06                | 1,38E-02            | <i>ART5</i>         | 675                      | promoter     | promoter            | <i>ART5</i>                                             |
| chr4:3835938-chr4:3835991        | 53            | 3                          | 0                       | 3                       | 1,38E-06                | 1,41E-02            | <i>ADRA2C</i>       | 67685                    | intergenic   |                     |                                                         |
| chr17:80272853-chr17:80272875    | 22            | 2                          | 2                       | 0                       | 1,53E-06                | 1,44E-02            | <i>CD7</i>          | 2606                     | exon         |                     |                                                         |
| chr1:12184835-chr1:12184846      | 11            | 2                          | 0                       | 2                       | 1,55E-06                | 1,44E-02            | <i>TNFRSF8</i>      | -1112                    | intron       |                     |                                                         |
| chr19:53511567-chr19:53511717    | 150           | 2                          | 0                       | 2                       | 1,78E-06                | 1,56E-02            | <i>AK127846</i>     | 954                      | promoter     |                     |                                                         |
| chr11:55640248-chr11:55640479    | 231           | 15                         | 0                       | 15                      | 1,99E-06                | 1,63E-02            | <i>TRIM51</i>       | -10418                   | intergenic   |                     |                                                         |
| chr14:34269670-chr14:34270090    | 420           | 18                         | 0                       | 18                      | 2,18E-06                | 1,75E-02            | <i>EGLN3</i>        | 150027                   | exon         |                     |                                                         |
| chr6:44243475-chr6:44243633      | 158           | 7                          | 7                       | 0                       | 2,38E-06                | 1,84E-02            | <i>SPATS1</i>       | 2832                     | intron       |                     |                                                         |
| chr8:144660146-chr8:144660722    | 576           | 4                          | 4                       | 0                       | 2,53E-06                | 1,87E-02            | <i>NAPRT1</i>       | -181                     | promoter     | promoter            | <i>NAPRT</i>                                            |
| chr19:42021679-chr19:42021799    | 120           | 4                          | 0                       | 4                       | 2,96E-06                | 2,04E-02            | <i>LOC100505495</i> | -15126                   | intergenic   |                     |                                                         |
| chr22:49447609-chr22:49448436    | 827           | 22                         | 22                      | 0                       | 3,10E-06                | 2,06E-02            | <i>LOC100128946</i> | 185390                   | intergenic   |                     |                                                         |
| chr4:81109888-chr4:81111756      | 1868          | 60                         | 0                       | 60                      | 3,78E-06                | 2,38E-02            | <i>PRDM8</i>        | 3915                     | intron       |                     |                                                         |
| chr19:23076700-chr19:23076831    | 131           | 3                          | 3                       | 0                       | 5,21E-06                | 2,90E-02            | <i>ZNF728</i>       | 93375                    | intergenic   |                     |                                                         |
| chr8:1950540-chr8:1950658        | 118           | 12                         | 12                      | 0                       | 5,43E-06                | 2,97E-02            | <i>KBTBD11</i>      | 1234                     | exon         | enhancer            | <i>KBTBD11</i>                                          |
| chr4:129135308-chr4:129135369    | 61            | 2                          | 2                       | 0                       | 5,83E-06                | 3,12E-02            | <i>LARP1B</i>       | 14716                    | intron       |                     |                                                         |
| chr20:47013135-chr20:47013950    | 815           | 22                         | 1                       | 21                      | 6,51E-06                | 3,40E-02            | <i>LINC00494</i>    | 19361                    | intergenic   |                     |                                                         |
| chr16:1122013-chr16:1122053      | 40            | 4                          | 4                       | 0                       | 7,70E-06                | 3,77E-02            | <i>SSTR5</i>        | -703                     | promoter     |                     |                                                         |
| chr1:19110630-chr1:19110910      | 280           | 5                          | 5                       | 0                       | 8,46E-06                | 4,01E-02            | <i>TAS1R2</i>       | 75526                    | intergenic   |                     |                                                         |
| chr9:140395198-chr9:140395357    | 159           | 7                          | 7                       | 0                       | 8,94E-06                | 4,09E-02            | <i>PNPLA7</i>       | -13212                   | intron       |                     |                                                         |
| chr7:155211140-chr7:155211176    | 36            | 7                          | 0                       | 7                       | 1,04E-05                | 4,34E-02            | <i>BC150495</i>     | 36387                    | intergenic   |                     |                                                         |
| chr1:121143410-chr1:121143613    | 203           | 10                         | 0                       | 10                      | 1,21E-05                | 4,80E-02            | <i>SRGAP2D</i>      | 36313                    | intergenic   |                     |                                                         |
| chr3:194705950-chr3:194706107    | 157           | 5                          | 0                       | 5                       | 1,35E-05                | 4,93E-02            | <i>XXYL1</i>        | 136975                   | intergenic   |                     |                                                         |
| chr16:32289928-chr16:32290380    | 452           | 10                         | 0                       | 10                      | 1,42E-05                | 5,14E-02            | <i>LOC390705</i>    | 11324                    | intergenic   |                     |                                                         |
| chr8:52321396-chr8:52321489      | 93            | 2                          | 0                       | 2                       | 1,49E-05                | 5,26E-02            | <i>PXDNL</i>        | 726                      | promoter     |                     |                                                         |
| chr7:99067328-chr7:99067371      | 43            | 4                          | 4                       | 0                       | 1,67E-05                | 5,47E-02            | <i>TRNA_Trp</i>     | 66                       | promoter     |                     |                                                         |
| chr10:70776965-chr10:70776986    | 21            | 2                          | 2                       | 0                       | 1,68E-05                | 5,47E-02            | <i>KIAA1279</i>     | 28511                    | intergenic   |                     |                                                         |



|                                 |      |    |    |    |          |          |                     |        |            |          |                                            |
|---------------------------------|------|----|----|----|----------|----------|---------------------|--------|------------|----------|--------------------------------------------|
| chr14:103603202-chr14:103603554 | 352  | 10 | 0  | 10 | 1,70E-05 | 5,50E-02 | <i>TNFAIP2</i>      | 4287   | exon       | enhancer | <i>NDUFB4P11</i>                           |
| chr4:1521934-chr4:1522400       | 466  | 24 | 24 | 0  | 1,81E-05 | 5,67E-02 | <i>AX748388</i>     | 55872  | intergenic |          |                                            |
| chr5:51168-chr5:51230           | 62   | 3  | 0  | 3  | 1,90E-05 | 5,88E-02 | <i>PLEKHG4B</i>     | -89152 | intergenic |          |                                            |
| chr19:49000956-chr19:49001623   | 667  | 4  | 4  | 0  | 2,39E-05 | 6,55E-02 | <i>LMTK3</i>        | 14824  | exon       |          |                                            |
| chr6:163570179-chr6:163570776   | 597  | 34 | 0  | 34 | 2,41E-05 | 6,56E-02 | <i>AK296276</i>     | 42574  | intron     |          |                                            |
| chr20:61642309-chr20:61642387   | 78   | 5  | 5  | 0  | 2,47E-05 | 6,65E-02 | <i>LOC63930</i>     | 1626   | intron     | enhancer | <i>BHLHE23, LINC01749</i>                  |
| chr8:144787910-chr8:144789427   | 1517 | 24 | 24 | 0  | 2,75E-05 | 7,21E-02 | <i>CCDC166</i>      | 1666   | intron     |          |                                            |
| chr6:2972312-chr6:2972326       | 14   | 3  | 0  | 3  | 2,88E-05 | 7,31E-02 | <i>SERPINB6</i>     | 74     | promoter   | promoter | <i>SERPINB6</i>                            |
| chr15:101661802-chr15:101662001 | 199  | 8  | 0  | 8  | 3,57E-05 | 8,08E-02 | <i>CHSY1</i>        | 66465  | intergenic | enhancer | <i>CHSY1</i>                               |
| chr10:134597567-chr10:134597708 | 141  | 2  | 2  | 0  | 3,86E-05 | 8,40E-02 | <i>NKX6-2</i>       | 1971   | intergenic |          |                                            |
| chr5:126111555-chr5:126111694   | 139  | 6  | 0  | 6  | 3,95E-05 | 8,48E-02 | <i>LMNB1</i>        | -631   | promoter   |          |                                            |
| chr16:121845-chr16:121905       | 60   | 3  | 0  | 3  | 3,95E-05 | 8,48E-02 | <i>RHBDF1</i>       | 785    | promoter   | promoter | <i>NPRL3, ENSG00000268836, MPG, RHBDF1</i> |
| chr20:3733245-chr20:3733249     | 4    | 2  | 0  | 2  | 4,06E-05 | 8,59E-02 | <i>C20orf27</i>     | 15208  | exon       | enhancer | <i>HSPA12B, CDC25B</i>                     |
| chr16:433855-chr16:434103       | 248  | 8  | 0  | 8  | 4,30E-05 | 8,77E-02 | <i>LOC100134368</i> | 1864   | intron     | promoter | <i>TMEM8A, MRPL28</i>                      |
| chr11:96144166-chr11:96144326   | 160  | 2  | 0  | 2  | 4,37E-05 | 8,77E-02 | <i>JRKL</i>         | 21010  | intergenic |          |                                            |
| chr22:49588344-chr22:49588480   | 136  | 6  | 0  | 6  | 4,61E-05 | 8,95E-02 | <i>LOC100128946</i> | 325900 | intergenic |          |                                            |
| chr19:1047141-chr19:1047391     | 250  | 15 | 15 | 0  | 4,70E-05 | 9,01E-02 | <i>ABCA7</i>        | 4529   | exon       |          |                                            |
| chr3:128151140-chr3:128151291   | 151  | 7  | 0  | 7  | 4,81E-05 | 9,11E-02 | <i>DNAJB8</i>       | 30862  | intergenic |          |                                            |
| chr4:123286278-chr4:123286282   | 4    | 2  | 0  | 2  | 5,02E-05 | 9,30E-02 | <i>ADAD1</i>        | -13843 | intergenic |          |                                            |
| chr17:72916365-chr17:72916434   | 69   | 5  | 5  | 0  | 5,06E-05 | 9,32E-02 | <i>USH1G</i>        | 2923   | exon       |          |                                            |
| chr20:2690382-chr20:2690396     | 14   | 2  | 0  | 2  | 5,50E-05 | 9,77E-02 | <i>EBF4</i>         | 16860  | intron     |          |                                            |
| chr3:13275511-chr3:13275522     | 11   | 3  | 0  | 3  | 5,53E-05 | 9,80E-02 | <i>NUP210</i>       | 120673 | intergenic |          |                                            |

**ESM Table 14. Differentially methylated regions identified in the CD4<sup>+</sup>CD8<sup>+</sup> cell fraction between cases and controls prior to seroconversion**

| Differentially methylated region |               |                            |                         |                         |                         |                     | Nearest gene        |                          |              | GeneHancer analysis |                                                  |
|----------------------------------|---------------|----------------------------|-------------------------|-------------------------|-------------------------|---------------------|---------------------|--------------------------|--------------|---------------------|--------------------------------------------------|
| DMR                              | Area size, bp | Number of significant CpGs | Number of positive CpGs | Number of negative CpGs | Best P value within DMR | Best FDR within FDR | Nearest gene        | Distance to nearest gene | Genomic part | GeneHancer database | Genes possibly regulated by enhancer or promoter |
| chr2:113192187-chr2:113192585    | 398           | 9                          | 9                       | 0                       | 6,45E-13                | 1,87E-07            | <i>RGPD8</i>        | -416                     | promoter     |                     |                                                  |
| chr8:144787766-chr8:144788824    | 1058          | 23                         | 23                      | 0                       | 1,09E-12                | 2,37E-07            | <i>CCDC166</i>      | 1666                     | intron       |                     |                                                  |
| chr3:194705950-chr3:194706146    | 196           | 9                          | 0                       | 9                       | 9,52E-12                | 1,38E-06            | <i>XXYL1</i>        | 136975                   | intergenic   |                     |                                                  |
| chr9:136063893-chr9:136063981    | 88            | 2                          | 0                       | 2                       | 4,89E-10                | 4,25E-05            | <i>OBP2B</i>        | 20648                    | intergenic   |                     |                                                  |
| chr6:163570410-chr6:163570776    | 366           | 16                         | 0                       | 16                      | 5,53E-10                | 4,25E-05            | <i>AK296276</i>     | 42175                    | intron       |                     |                                                  |
| chr2:176121784-chr2:176121927    | 143           | 8                          | 0                       | 8                       | 6,44E-10                | 4,32E-05            | <i>ATP5G3</i>       | -75360                   | intergenic   |                     |                                                  |
| chr22:49447601-chr22:49447913    | 312           | 13                         | 13                      | 0                       | 1,85E-09                | 1,08E-04            | <i>LOC100128946</i> | 185265                   | intergenic   |                     |                                                  |
| chr10:123909315-chr10:123909514  | 199           | 2                          | 2                       | 0                       | 3,11E-09                | 1,70E-04            | <i>TACC2</i>        | -13591                   | intron       |                     |                                                  |
| chr11:65359906-chr11:65360009    | 103           | 12                         | 0                       | 12                      | 6,92E-09                | 3,14E-04            | <i>KCNK7</i>        | 3500                     | exon         | enhancer            | <i>MAP3K11, EHBP1L1</i>                          |
| chr9:136075028-chr9:136075533    | 505           | 14                         | 14                      | 0                       | 1,36E-08                | 5,18E-04            | <i>OBP2B</i>        | 9153                     | intergenic   |                     |                                                  |
| chr9:137673849-chr9:137674085    | 236           | 14                         | 0                       | 14                      | 1,43E-08                | 5,18E-04            | <i>MIR3689C</i>     | 67265                    | intron       |                     |                                                  |
| chr4:8890133-chr4:8891755        | 1622          | 7                          | 7                       | 0                       | 2,46E-08                | 7,96E-04            | <i>HMX1</i>         | -16770                   | intergenic   |                     |                                                  |
| chr11:122427537-chr11:122427617  | 80            | 14                         | 0                       | 14                      | 2,84E-08                | 8,84E-04            | <i>TRNA_Lys</i>     | -3042                    | intergenic   |                     |                                                  |
| chr10:1416791-chr10:1416983      | 192           | 17                         | 0                       | 17                      | 4,08E-08                | 1,19E-03            | <i>ADARB2-AS1</i>   | -152006                  | intron       |                     |                                                  |
| chr16:32289963-chr16:32290196    | 233           | 7                          | 0                       | 7                       | 6,46E-08                | 1,61E-03            | <i>LOC390705</i>    | 11107                    | intergenic   |                     |                                                  |
| chr1:43425385-chr1:43425514      | 129           | 7                          | 7                       | 0                       | 1,92E-07                | 3,22E-03            | <i>SLC2A1</i>       | -633                     | promoter     | promoter            | <i>SVBP, SLC2A1, SLC2A1-AS1</i>                  |
| chr11:132662753-chr11:132662968  | 215           | 5                          | 0                       | 5                       | 2,14E-07                | 3,46E-03            | <i>OPCML</i>        | 150219                   | intron       |                     |                                                  |
| chr11:55640097-chr11:55640479    | 382           | 19                         | 0                       | 19                      | 3,37E-07                | 5,16E-03            | <i>TRIM51</i>       | -10541                   | intergenic   |                     |                                                  |
| chr6:109705248-chr6:109705383    | 135           | 6                          | 0                       | 6                       | 3,55E-07                | 5,34E-03            | <i>CD164</i>        | -1568                    | intergenic   | promoter            | <i>SMPD2, ZBTB24</i>                             |
| chr11:59323373-chr11:59323375    | 2             | 2                          | 2                       | 0                       | 6,30E-07                | 6,79E-03            | <i>TRNA_Lys</i>     | -527                     | promoter     | enhancer            | <i>STX3</i>                                      |
| chr19:37463627-chr19:37463867    | 240           | 6                          | 6                       | 0                       | 1,04E-06                | 9,32E-03            | <i>ZNF568</i>       | -296                     | promoter     | promoter            | <i>ZNF383, ZNF527, ZNF568</i>                    |
| chr8:144659799-chr8:144660146    | 347           | 17                         | 17                      | 0                       | 1,39E-06                | 1,10E-02            | <i>NAPRT1</i>       | 494                      | promoter     | promoter            | <i>NAPRT</i>                                     |
| chr7:154684101-chr7:154684455    | 354           | 12                         | 0                       | 12                      | 1,44E-06                | 1,13E-02            | <i>LOC100132707</i> | -35955                   | exon         |                     |                                                  |
| chr6:121069599-chr6:121069769    | 170           | 6                          | 0                       | 6                       | 1,95E-06                | 1,36E-02            | <i>C6orf170</i>     | 488506                   | intergenic   |                     |                                                  |
| chr10:2964694-chr10:2964704      | 10            | 2                          | 0                       | 2                       | 2,05E-06                | 1,41E-02            | <i>PFKP</i>         | -145018                  | intergenic   |                     |                                                  |
| chr18:77476218-chr18:77476246    | 28            | 3                          | 3                       | 0                       | 2,64E-06                | 1,68E-02            | <i>CTDP1</i>        | 34793                    | intron       |                     |                                                  |
| chr5:110229890-chr5:110230059    | 169           | 5                          | 0                       | 5                       | 3,03E-06                | 1,82E-02            | <i>SLC25A46</i>     | 155138                   | intergenic   |                     |                                                  |
| chr8:95962270-chr8:95962352      | 82            | 3                          | 0                       | 3                       | 3,66E-06                | 2,05E-02            | <i>TP53INP1</i>     | -673                     | promoter     | promoter            | <i>TP53INP1, NDUFAF6</i>                         |
| chr17:1479078-chr17:1479190      | 112           | 4                          | 0                       | 4                       | 4,36E-06                | 2,29E-02            | <i>PITPNA</i>       | -13081                   | intron       | enhancer            | <i>SLC43A2</i>                                   |
| chr10:46097162-chr10:46097166    | 4             | 3                          | 0                       | 3                       | 5,20E-06                | 2,54E-02            | <i>MARCH8</i>       | -6811                    | intergenic   |                     |                                                  |
| chr2:107200907-chr2:107200963    | 56            | 9                          | 0                       | 9                       | 7,89E-06                | 3,19E-02            | <i>RGPD3</i>        | -116153                  | intergenic   |                     |                                                  |
| chr20:61642298-chr20:61642401    | 103           | 6                          | 6                       | 0                       | 8,55E-06                | 3,33E-02            | <i>LOC63930</i>     | 1626                     | intron       | enhancer            | <i>BHLHE23, LINC01749</i>                        |
| chr19:37807567-chr19:37807945    | 378           | 22                         | 22                      | 0                       | 8,70E-06                | 3,37E-02            | <i>HKR1</i>         | -1156                    | intron       | promoter            | <i>ZNF527, LINC01535, ZNF793, HKR1</i>           |
| chr1:172419795-chr1:172419861    | 66            | 3                          | 3                       | 0                       | 9,17E-06                | 3,41E-02            | <i>PIGC</i>         | -6579                    | intron       | enhancer            | <i>C1orf105, PIGC, SUCO</i>                      |
| chr7:98029126-chr7:98029163      | 37            | 2                          | 0                       | 2                       | 9,54E-06                | 3,47E-02            | <i>BAIAP2L1</i>     | 1265                     | intron       | promoter            | <i>BR13, BAIAP2L1</i>                            |
| chr11:62370220-chr11:62370410    | 190           | 11                         | 0                       | 11                      | 9,98E-06                | 3,54E-02            | <i>MTA2</i>         | -1099                    | intron       | promoter            | <i>EML3, GANAB, TUT1, MTA2</i>                   |
| chr12:12225214-chr12:12225285    | 71            | 6                          | 0                       | 6                       | 1,02E-05                | 3,56E-02            | <i>BCL2L14</i>      | 885                      | promoter     | promoter            | <i>BCL2L14</i>                                   |
| chr20:46526131-chr20:46526153    | 22            | 2                          | 0                       | 2                       | 1,11E-05                | 3,72E-02            | <i>BX648826</i>     | -58890                   | intergenic   |                     |                                                  |
| chr6:1599255-chr6:1599388        | 133           | 8                          | 8                       | 0                       | 1,18E-05                | 3,83E-02            | <i>FOXC1</i>        | -11293                   | intergenic   |                     |                                                  |
| chr14:24801057-chr14:24801180    | 123           | 4                          | 0                       | 4                       | 1,61E-05                | 4,57E-02            | <i>ADCY4</i>        | 3171                     | exon         |                     |                                                  |
| chr16:87709144-chr16:87709241    | 97            | 4                          | 4                       | 0                       | 1,65E-05                | 4,60E-02            | <i>FLJ00104</i>     | 26179                    | intron       |                     |                                                  |

|                                 |      |    |    |    |          |          |                     |                   |          |                         |
|---------------------------------|------|----|----|----|----------|----------|---------------------|-------------------|----------|-------------------------|
| chr19:22700742-chr19:22700806   | 64   | 3  | 3  | 0  | 2,42E-05 | 5,86E-02 | <i>LOC440518</i>    | -78253 intergenic |          |                         |
| chr8:72754075-chr8:72754314     | 239  | 7  | 7  | 0  | 2,50E-05 | 5,96E-02 | <i>LOC100132891</i> | -1269 exon        | promoter | <i>MSC</i>              |
| chr6:39280817-chr6:39280861     | 44   | 4  | 0  | 4  | 2,51E-05 | 5,96E-02 | <i>KCNK17</i>       | 1421 intron       | enhancer | <i>KCNK17</i>           |
| chr3:118892305-chr3:118892496   | 191  | 10 | 10 | 0  | 2,53E-05 | 5,96E-02 | <i>UPK1B</i>        | 44 promoter       |          |                         |
| chr19:56769408-chr19:56769430   | 22   | 3  | 0  | 3  | 2,65E-05 | 6,09E-02 | <i>ZSCAN5A</i>      | -29750 intron     |          |                         |
| chr21:46675864-chr21:46677632   | 1768 | 27 | 27 | 0  | 2,65E-05 | 6,09E-02 | <i>POFUT2</i>       | 19855 intron      |          |                         |
| chr4:81109972-chr4:81111756     | 1784 | 51 | 0  | 51 | 2,88E-05 | 6,40E-02 | <i>PRDM8</i>        | 3856 intron       |          |                         |
| chr8:54935437-chr8:54935522     | 85   | 2  | 2  | 0  | 2,92E-05 | 6,40E-02 | <i>TCEA1</i>        | -515 promoter     |          |                         |
| chr17:4805462-chr17:4805474     | 12   | 2  | 2  | 0  | 3,03E-05 | 6,52E-02 | <i>CHRNE</i>        | 908 promoter      | promoter | <i>CHRNE, C17orf107</i> |
| chr12:32626634-chr12:32626743   | 109  | 3  | 0  | 3  | 3,26E-05 | 6,79E-02 | <i>FGD4</i>         | -12272 intergenic |          |                         |
| chr6:1594275-chr6:1594451       | 176  | 3  | 3  | 0  | 3,75E-05 | 7,39E-02 | <i>FOXC1</i>        | -16406 intergenic |          |                         |
| chr14:19888706-chr14:19889624   | 918  | 19 | 0  | 19 | 3,92E-05 | 7,61E-02 | <i>LINC00516</i>    | -4792 intron      |          |                         |
| chr21:46714714-chr21:46714850   | 136  | 3  | 0  | 3  | 4,03E-05 | 7,77E-02 | <i>LOC642852</i>    | 6871 exon         | enhancer | <i>LINC00205</i>        |
| chr5:270919-chr5:271209         | 290  | 7  | 7  | 0  | 4,12E-05 | 7,86E-02 | <i>PDCD6</i>        | -682 promoter     | promoter | <i>HRAT5</i>            |
| chr3:193678336-chr3:193678373   | 37   | 2  | 0  | 2  | 4,18E-05 | 7,94E-02 | <i>DPPA2P3</i>      | 33692 intron      |          |                         |
| chr19:1047188-chr19:1047323     | 135  | 11 | 11 | 0  | 4,93E-05 | 8,68E-02 | <i>ABCA7</i>        | 4605 exon         |          |                         |
| chr19:22800715-chr19:22800880   | 165  | 4  | 4  | 0  | 4,94E-05 | 8,68E-02 | <i>BC030765</i>     | 5979 intron       |          |                         |
| chr7:64540916-chr7:64540960     | 44   | 3  | 0  | 3  | 4,97E-05 | 8,70E-02 | <i>BC044608</i>     | 723 promoter      | enhancer | <i>GTF2IP14</i>         |
| chr14:105636575-chr14:105636711 | 136  | 5  | 0  | 5  | 5,10E-05 | 8,78E-02 | <i>JAG2</i>         | -1415 intergenic  |          |                         |
| chr19:50962477-chr19:50962487   | 10   | 2  | 2  | 0  | 5,31E-05 | 9,00E-02 | <i>EMC10</i>        | -17180 exon       |          |                         |
| chr3:96495764-chr3:96495824     | 60   | 5  | 0  | 5  | 5,74E-05 | 9,29E-02 | <i>EPHA6</i>        | -37653 intergenic |          |                         |
| chr2:113190019-chr2:113190239   | 220  | 9  | 9  | 0  | 6,01E-05 | 9,55E-02 | <i>RGPD8</i>        | 1026 intron       | promoter | <i>RGPD8</i>            |
